# Supplementary material for: Genetic Liability to Insomnia and Lung Cancer Risk: A Mendelian Randomization Analysis
Source: Frontiers journal article supplement (doi:10.3389/fgene.2021.756908), 2021-12-01
Supplement: Data_Sheet_1.PDF [file Data_Sheet_1.PDF]

# **Genetic Liability to Insomnia and Lung Cancer Risk: a Mendelian Randomization Analysis**

## **Contents:**

**Supplementary figure 1.** Mendelian randomization regression slopes of the MR analysis between insomnia and lung cancer;

**Supplementary figure 2.** Single SNP analysis in the MR analysis between insomnia and lung cancer;

**Supplementary figure 3.** Leave-one-out analysis in the MR analysis between insomnia and lung cancer;

**Supplementary figure 4.** Funnel plot in the MR Egger analysis between insomnia and lung cancer;

**Supplementary figure 5.** Mendelian randomization regression slopes of the MR analysis between insomnia and lung adenocarcinoma;

**Supplementary figure 6.** Mendelian randomization regression slopes of the MR analysis between insomnia and lung squamous cell carcinoma;

**Supplementary figure 7.** Single SNP analysis in the MR analysis between insomnia and lung adenocarcinoma;

**Supplementary figure 8.** Single SNP analysis in the MR analysis between insomnia and lung squamous cell carcinoma;

**Supplementary figure 9.** Leave-one-out analysis in the MR analysis between insomnia and lung adenocarcinoma;

**Supplementary figure 10.** Leave-one-out analysis in the MR analysis between insomnia and lung squamous cell carcinoma;

**Supplementary figure 11.** Funnel plot in the MR Egger analysis between insomnia and lung adenocarcinoma;

**Supplementary figure 12.** Funnel plot in the MR Egger analysis between insomnia and lung squamous cell carcinoma.

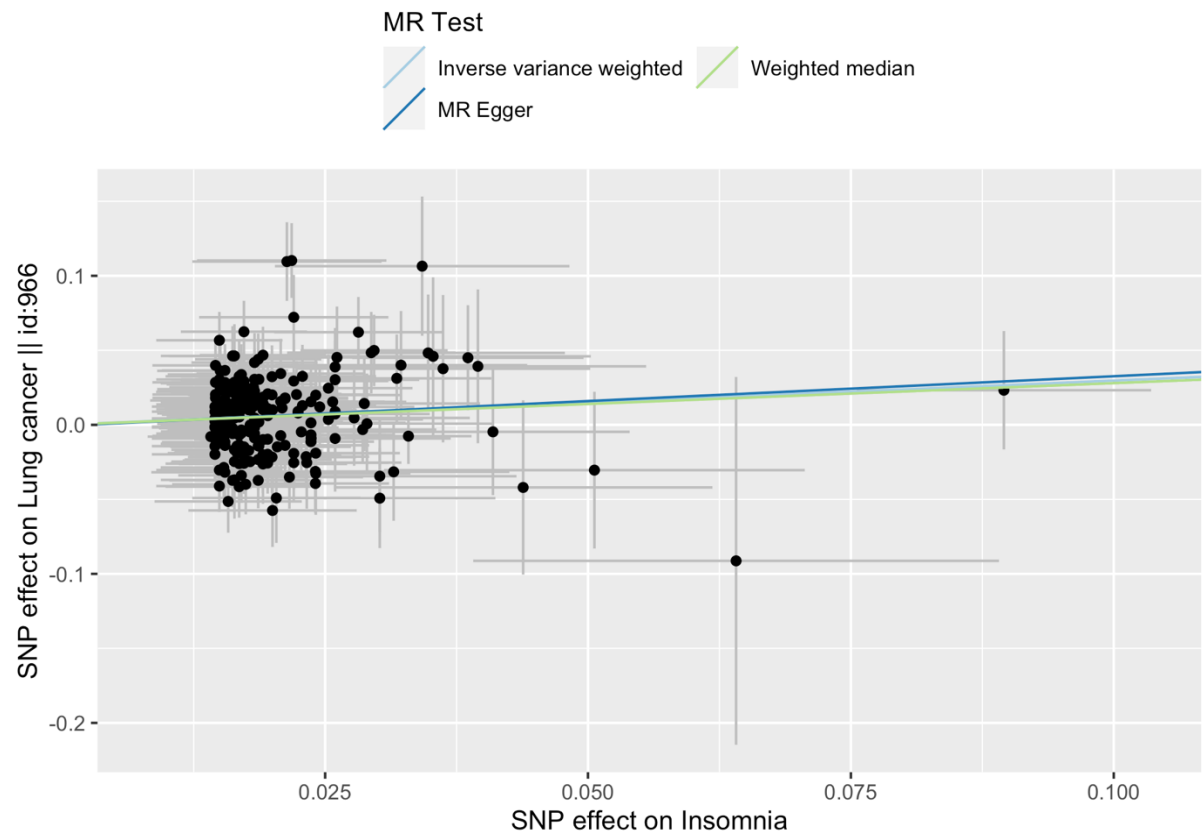

**Supplementary figure 1.** Mendelian randomization regression slopes of the MR analysis between insomnia and lung cancer.

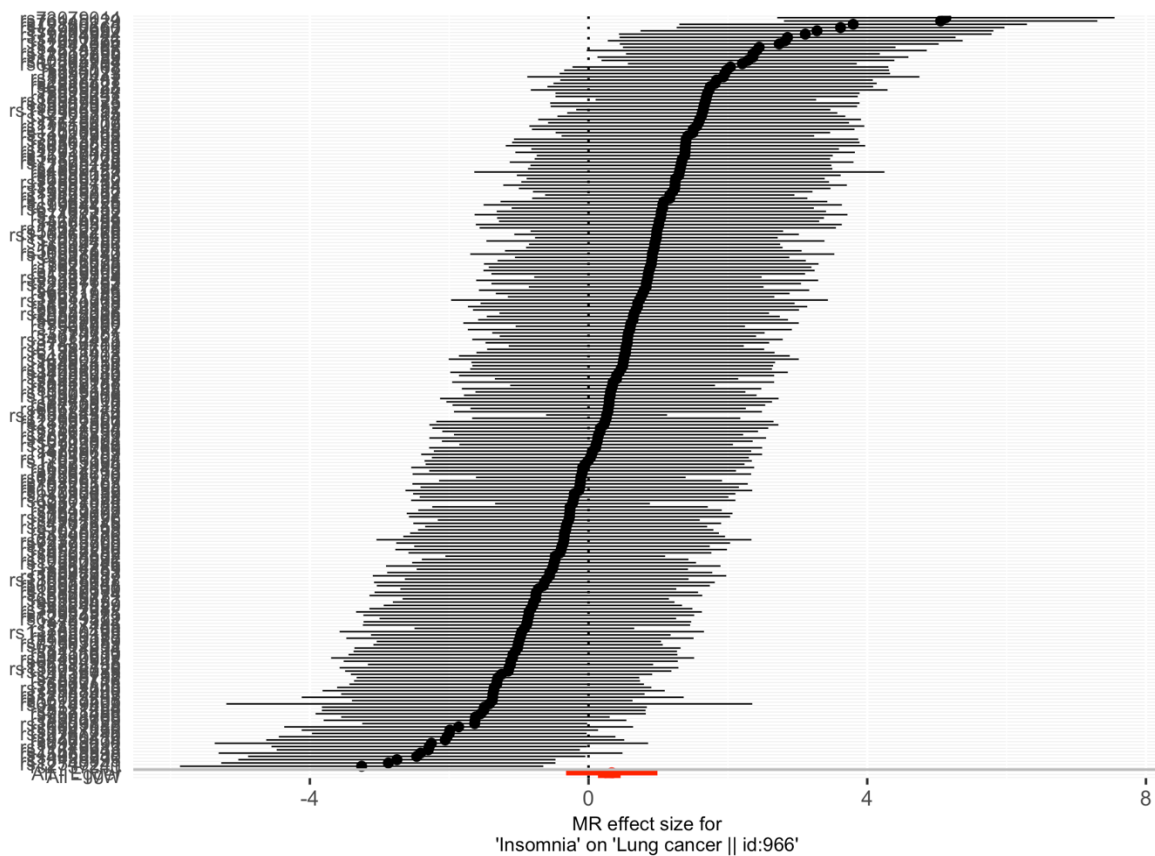

**Supplementary figure 2.** Single SNP analysis in the MR analysis between insomnia and lung cancer.

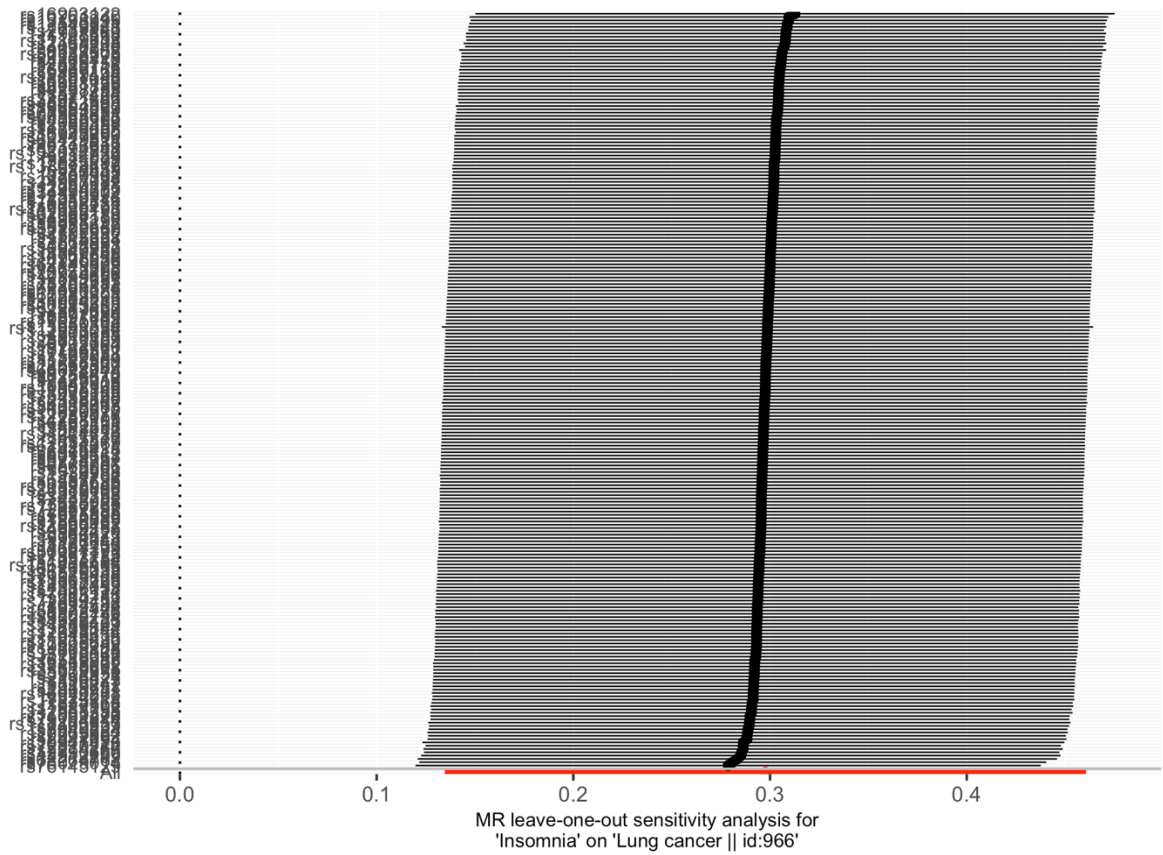

**Supplementary figure 3.** Leave-one-out analysis in the MR analysis between insomnia and lung cancer.

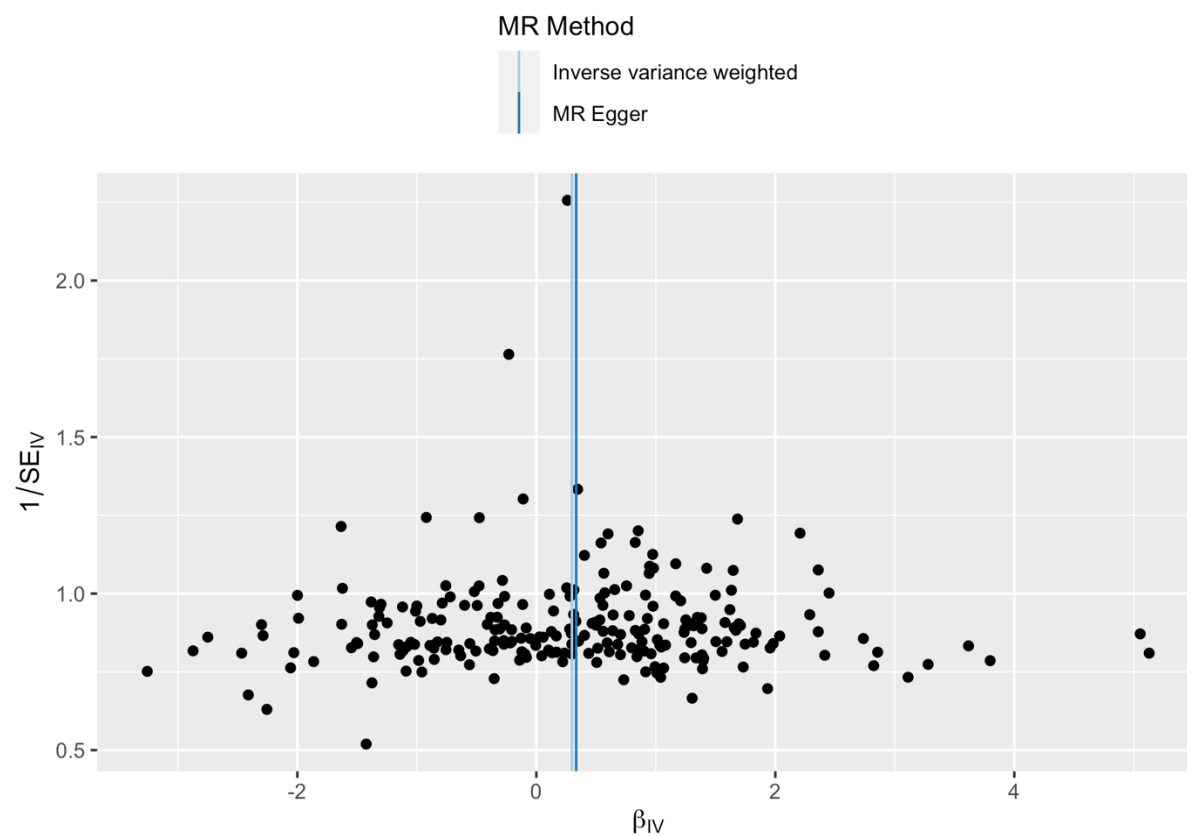

**Supplementary figure 4.** Funnel plot in the MR Egger analysis between insomnia and lung cancer.

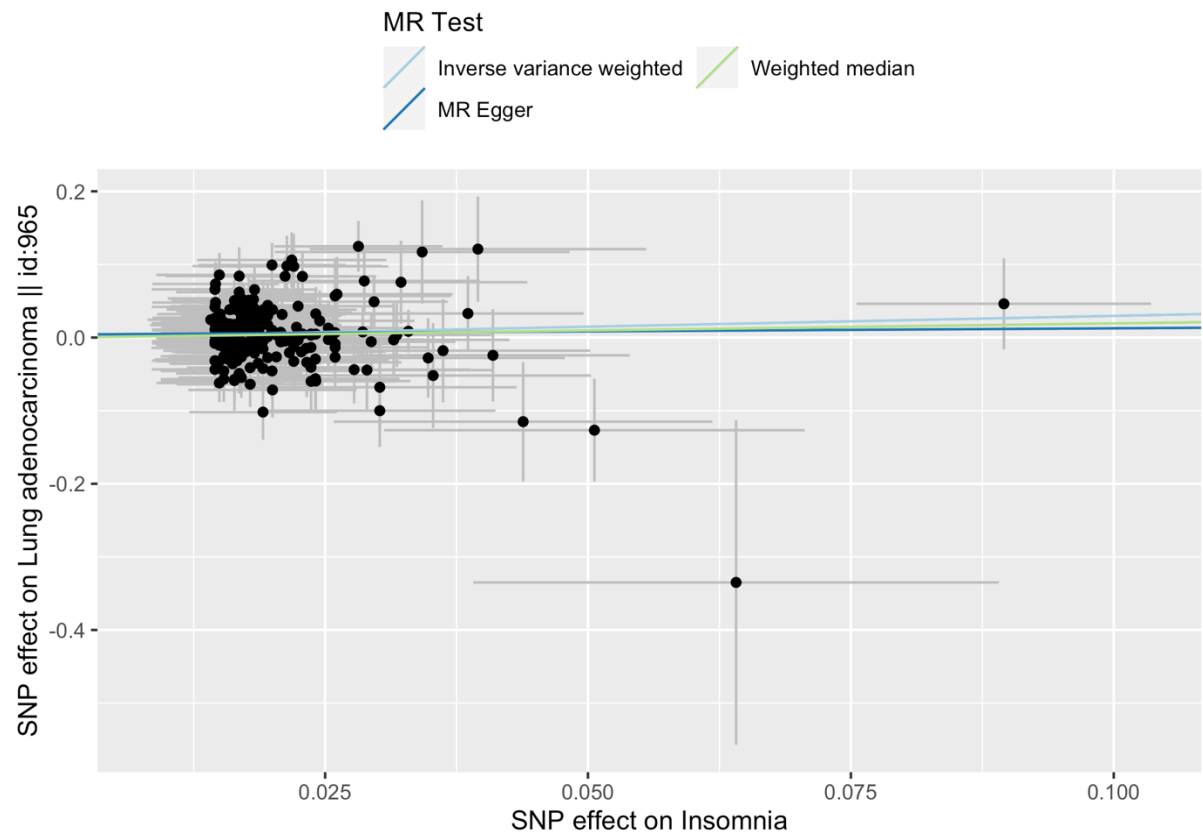

**Supplementary figure 5.** Mendelian randomization regression slopes of the MR analysis between insomnia and lung adenocarcinoma.

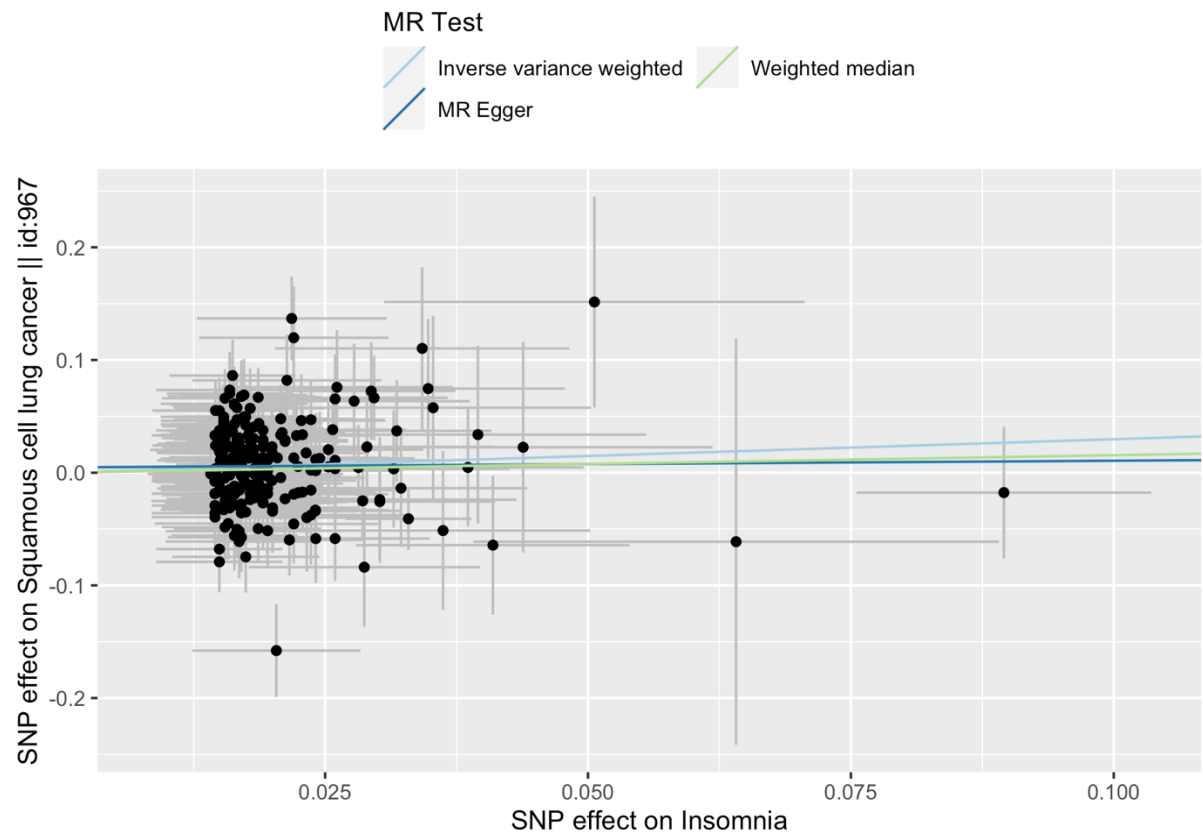

**Supplementary figure 6.** Mendelian randomization regression slopes of the MR analysis between insomnia and lung squamous cell carcinoma.



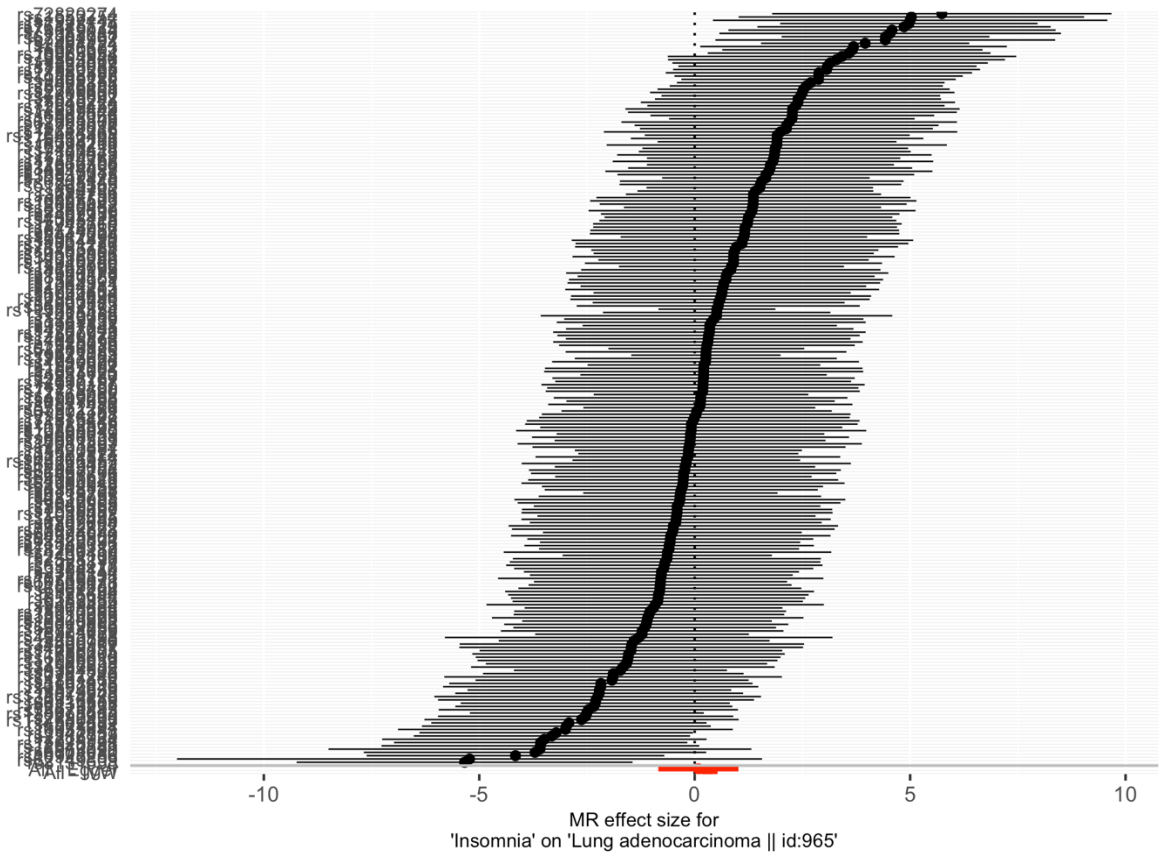

**Supplementary figure 7.** Single SNP analysis in the MR analysis between insomnia and lung adenocarcinoma.

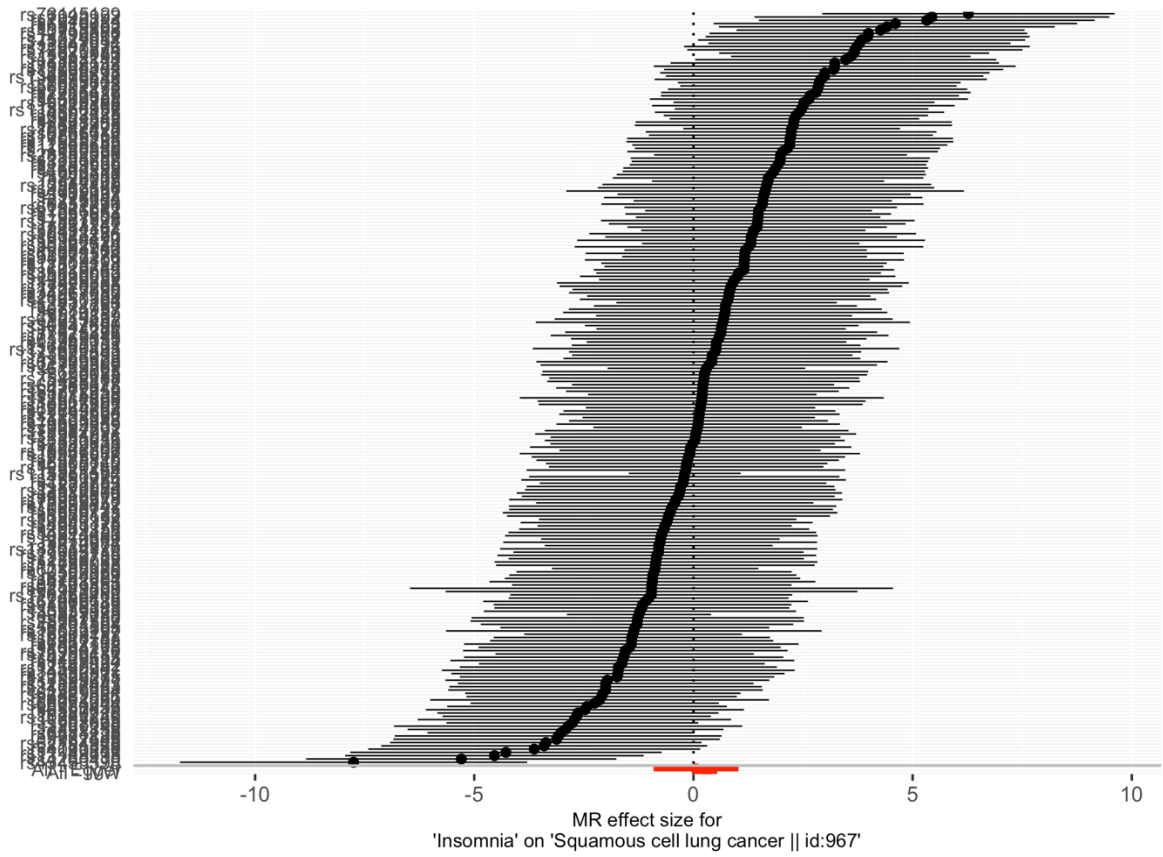

**Supplementary figure 8.** Single SNP analysis in the MR analysis between insomnia and lung squamous cell carcinoma.

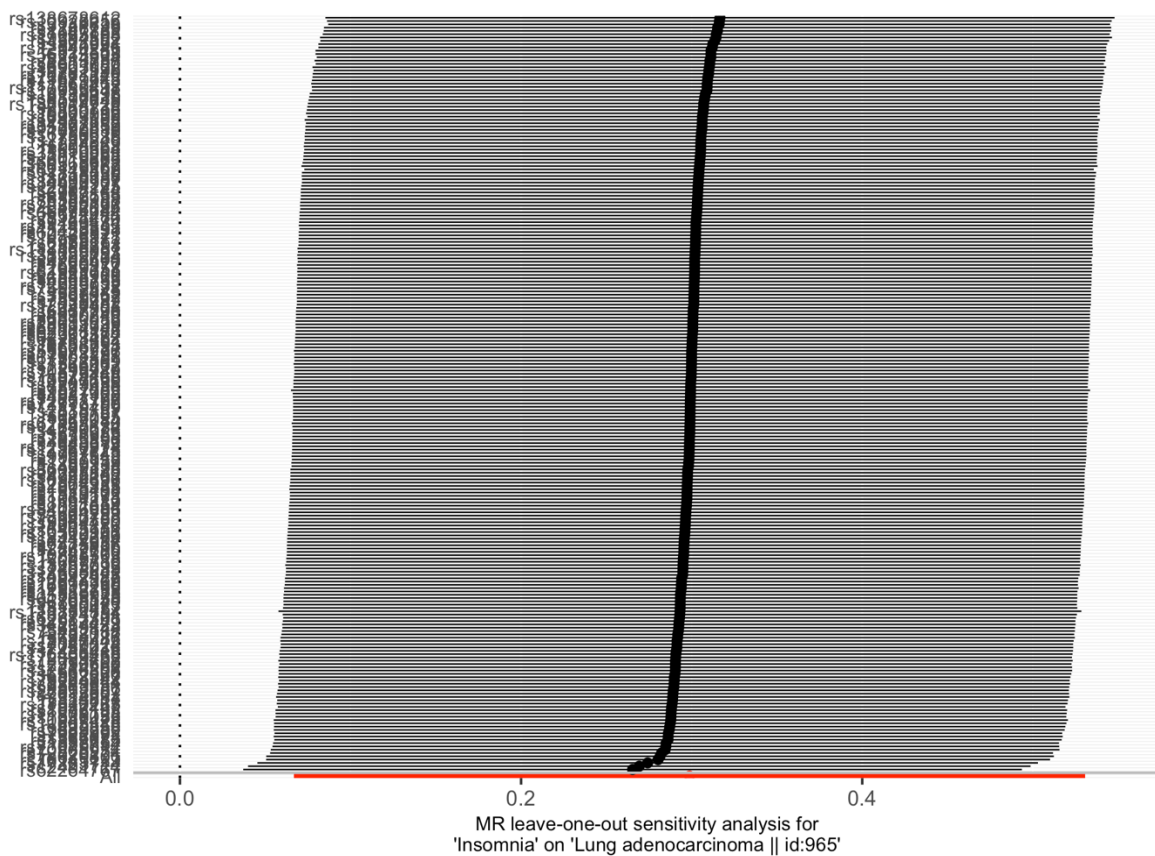

**Supplementary figure 9.** Leave-one-out analysis in the MR analysis between insomnia and lung adenocarcinoma.

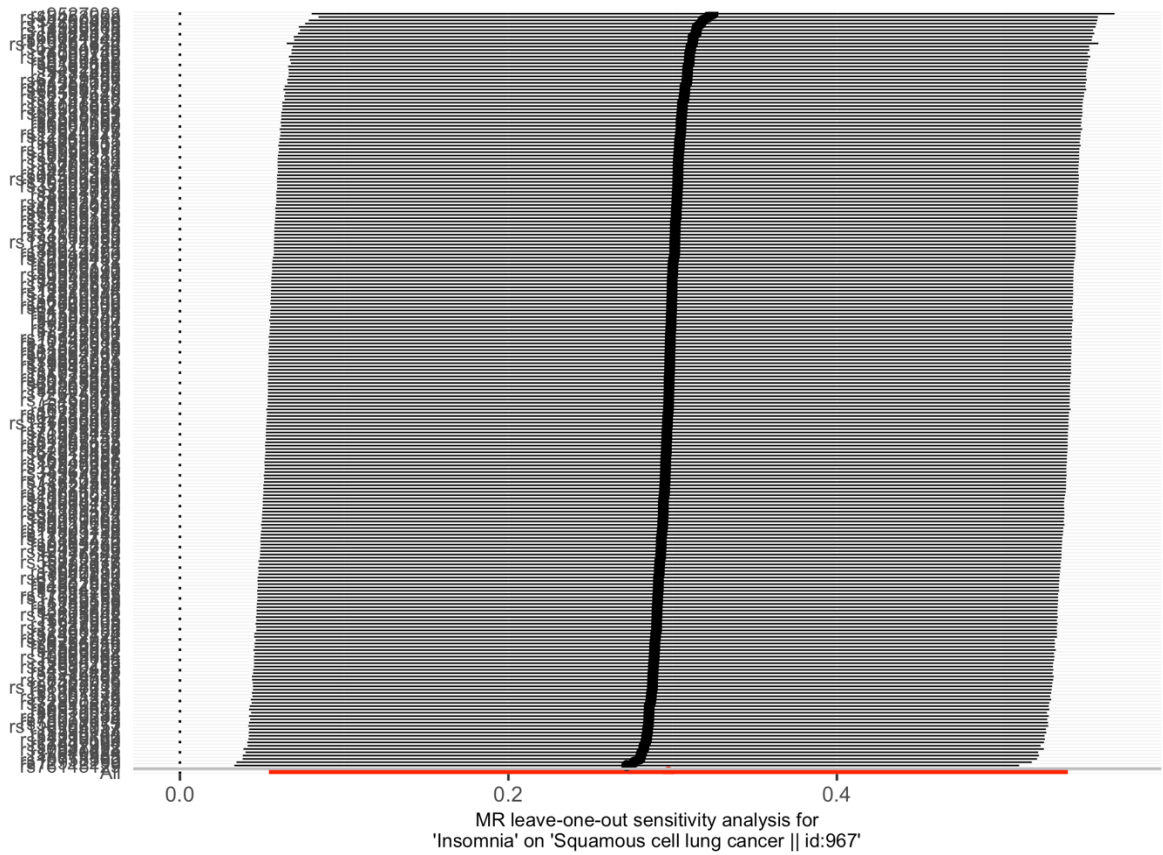

**Supplementary figure 10.** Leave-one-out analysis in the MR analysis between insomnia and lung squamous cell carcinoma.

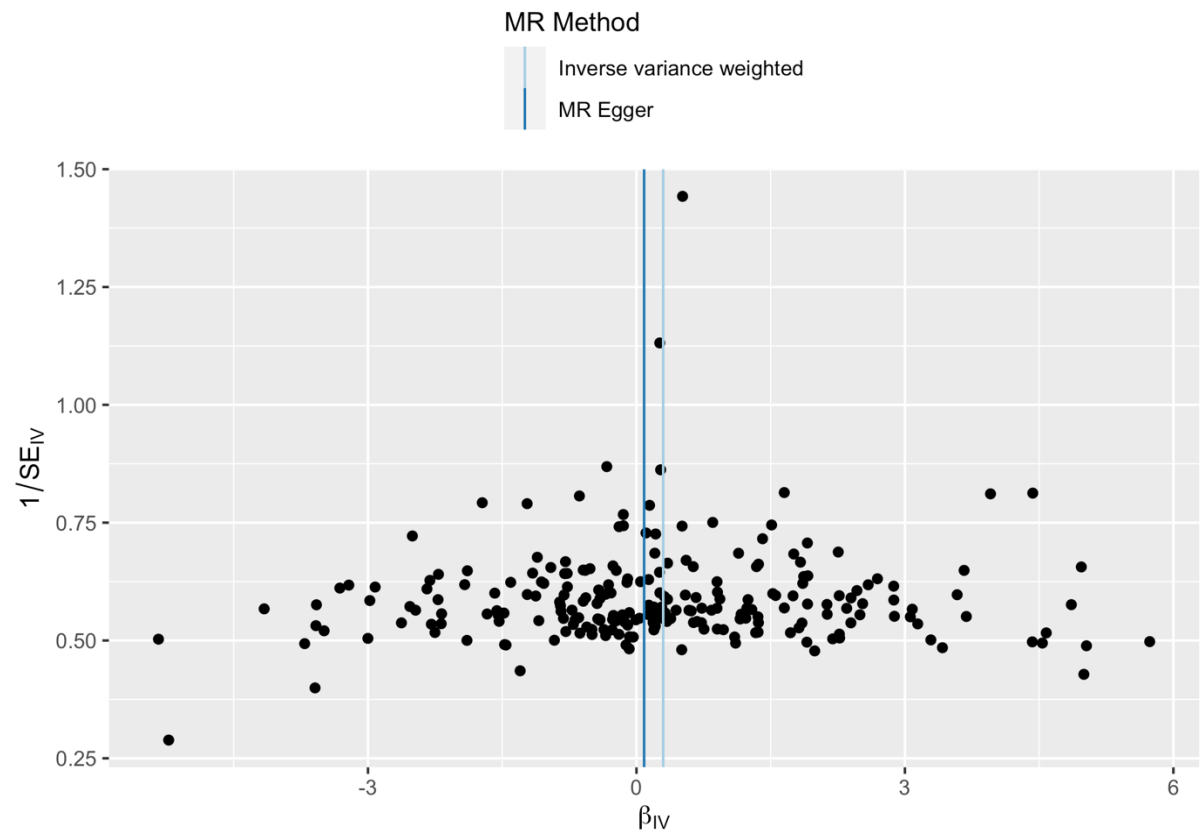

**Supplementary figure 11.** Funnel plot in the MR Egger analysis between insomnia and lung adenocarcinoma.

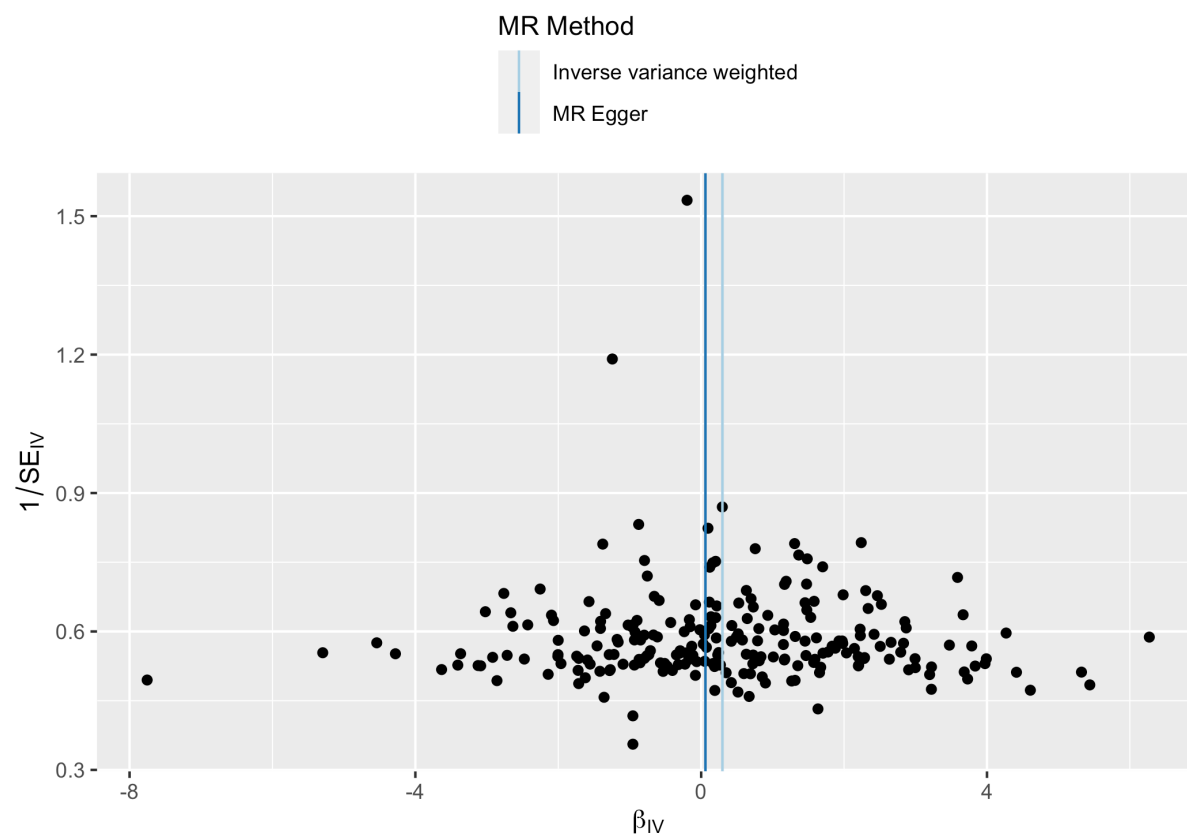

**Supplementary figure 12.** Funnel plot in the MR Egger analysis between insomnia and lung squamous cell carcinoma.
