# Supplementary material for: Genetic Liability to Insomnia and Lung Cancer Risk: A Mendelian Randomization Analysis
Source: Front Genet. 2021 Dec 1;12:756908. doi: 10.3389/fgene.2021.756908 (PMC8672094; doi:10.3389/fgene.2021.756908)
Supplement: Supplementary file 2 [file DataSheet2.xlsx]

## Sheet: Index
Index
Supplementary table 1. Effect allele, frequency of effect allele, effect on insomnia and strength of association with lung cancer of the SNPs used.
Supplementary table 2. Results of single SNP analysis in the MR of lung cancer, lung adenocarcinoma and lung squamous cell carcinoma.
Supplementary table 3. Results of leave-one-out analysis in the MR of lung cancer, lung adenocarcinoma and lung squamous cell carcinoma.

## Sheet: S table 1
S table 1. Effect allele, frequency of effect allele, effect on insomnia and strength of association with lung cancer of the SNPs used.
SNP	Effect allele	Other allele	Effect allele frequency	Effect on insomnia			Strength of association with lung cancer			Strength of association with lung adenocarcinoma			Strength of association with lung squamous cell carcinoma
				Beta	Standard error	P-value	Beta	Standard error	P-value	Beta	Standard error	P-value	Beta	Standard error	P-value
rs1015438	A	G	0.1882	0.0253059	0.008	2.509e-14	0.024636	0.02249	0.271986	0.0129093	0.034073	0.710643	0.00511987	0.033653	0.882436
rs1031654	A	C	0.7996	-0.0222764	0.007	3.881e-12	-0.0203486	0.022383	0.364028	-0.0141366	0.033924	0.682821	-0.0329308	0.034455	0.339504
rs1038093	T	C	0.6282	0.0170333	0.006	2.466e-10	-0.00557145	0.018425	0.765275	-0.0071891	0.028053	0.801806	0.00730058	0.027796	0.799855
rs10502966	A	G	0.582	-0.0168249	0.006	8.537e-11	-0.0052482	0.018026	0.773745	-0.0152324	0.027919	0.589996	0.0151116	0.026963	0.591232
rs1064213	A	G	0.4789	-0.015923	0.006	6.407e-10	0.00135408	0.017886	0.940618	-0.010602	0.026936	0.70472	0.0232017	0.027997	0.409238
rs10756571	T	C	0.6853	0.0157788	0.006	1.799e-08	0.00208016	0.019453	0.916642	-0.0124512	0.030403	0.687456	-0.0271802	0.030597	0.375663
rs10758593	A	G	0.3989	-0.0154727	0.006	4.899e-09	0.00196008	0.018041	0.914844	0.00122625	0.027675	0.965561	-0.0660351	0.025937	0.020476
rs10761240	A	G	0.3963	-0.0186345	0.006	2.122e-12	0.0372486	0.01874	0.042746	0.035204	0.028762	0.217543	0.0496498	0.029094	0.081118
rs10800992	T	C	0.4431	0.0182843	0.006	3.835e-12	-0.00876631	0.017846	0.632453	-0.0202568	0.027025	0.474928	-0.0107617	0.027405	0.705567
rs10825503	T	G	0.4873	0.0145205	0.006	1.426e-08	-0.00176255	0.017831	0.922768	0.019734	0.028054	0.485234	0.0024061	0.027376	0.931669
rs10865954	T	C	0.3344	0.0182843	0.006	1.919e-11	0.0418346	0.019604	0.028991	0.0655255	0.030624	0.02646	0.0406687	0.030224	0.173437
rs10898940	A	C	0.5173	0.0149403	0.006	8.093e-09	0.013672	0.019917	0.50693	-0.00121127	0.030979	0.969722	0.0189229	0.030325	0.552833
rs10928256	T	C	0.4192	0.0149403	0.006	1.614e-08	-0.00587321	0.018139	0.751938	-0.0621446	0.026346	0.031166	0.0202006	0.028414	0.480535
rs10944696	A	G	0.2978	-0.0163737	0.007	7.994e-09	0.00446601	0.019265	0.819303	-0.010017	0.029093	0.740684	0.0120017	0.029781	0.692125
rs10947428	T	C	0.7858	-0.0296531	0.007	9.057e-21	-0.0499238	0.02395	0.032218	-0.0489816	0.036437	0.17281	-0.0664233	0.037417	0.067068
rs10947690	A	G	0.7408	-0.0204516	0.007	4.039e-12	0.0147431	0.020667	0.491227	-0.00278711	0.032501	0.933654	-0.0131817	0.032569	0.691342
rs10947987	T	C	0.4431	-0.0141246	0.006	4.08e-08	0.00790964	0.018279	0.668424	-0.0243081	0.027351	0.399041	0.00113635	0.027976	0.968434
rs10955647	T	G	0.5321	0.0145205	0.006	1.836e-08	-0.0091946	0.018115	0.614857	-0.0435728	0.028787	0.124064	-0.00690113	0.027684	0.807072
rs11001276	A	T	0.74	-0.0163737	0.007	2.523e-08	-0.0462307	0.021274	0.025752	-0.0179656	0.032268	0.582982	-0.0610575	0.032948	0.056232
rs11090039	A	G	0.2871	0.0170333	0.007	1.822e-09	-0.00348507	0.020105	0.865563	-0.0265627	0.030243	0.40712	0.0171914	0.031268	0.587613
rs11119409	T	C	0.5866	-0.0150229	0.006	1.193e-08	-0.0233502	0.018431	0.202712	-0.00283797	0.027685	0.920329	-0.0174793	0.02791	0.535259
rs11126082	C	G	0.4398	-0.0186345	0.006	8.257e-13	-0.0146366	0.018133	0.434807	-0.0098655	0.027916	0.73375	-0.0057495	0.02809	0.843178
rs11149313	A	G	0.7297	0.0174507	0.007	2.376e-09	-0.0399089	0.020155	0.043262	-0.0103651	0.029916	0.734001	-0.0746686	0.031632	0.013543
rs113851554	T	G	0.0506	0.0895519	0.014	1.563e-51	0.0232379	0.039693	0.56455	0.04616	0.062084	0.463898	-0.0176906	0.05836	0.779389
rs1147852	A	G	0.3095	0.0170333	0.006	9.935e-10	-0.0339033	0.018488	0.081995	-0.0547466	0.027584	0.068038	-0.0278266	0.028335	0.353625
rs11588755	A	G	0.522	-0.0150229	0.006	5.142e-09	-0.0362606	0.018707	0.048373	-0.0272766	0.028518	0.339088	-0.0330479	0.02859	0.245194
rs11605348	A	G	0.3495	-0.0195421	0.006	7.011e-13	-0.00614383	0.019315	0.756503	-0.0440668	0.028419	0.149814	-0.00222848	0.029447	0.941553
rs116466468	T	C	0.7593	0.0191163	0.007	2.106e-10	0.0186651	0.01992	0.367446	0.0366111	0.03	0.25416	-0.0184144	0.031369	0.562136
rs11650304	C	G	0.9308	0.0289777	0.012	1.227e-08	0.000759288	0.033634	0.982598	-0.0444665	0.053602	0.410537	0.0228634	0.049988	0.671408
rs1167132	T	C	0.3917	0.0153598	0.006	8.732e-09	0.0160525	0.01852	0.387078	0.00588465	0.028105	0.837715	0.0495109	0.029363	0.084933
rs11679943	A	G	0.3471	0.0161974	0.006	3.155e-09	-0.0372544	0.017983	0.05011	-0.0359143	0.02761	0.222692	-0.018821	0.02807	0.522589
rs11722569	T	C	0.6586	0.0149403	0.006	2.912e-08	0.00329643	0.019092	0.865914	-0.00115234	0.029417	0.969607	0.00521859	0.029264	0.863231
rs11756035	C	G	0.1281	0.0220157	0.009	1.288e-08	-0.025364	0.026304	0.360169	-0.0325903	0.039443	0.442855	-0.0191288	0.040811	0.659369
rs117630493	C	G	0.9726	-0.0438316	0.018	3.608e-08	0.0419987	0.058475	0.517865	0.115098	0.081563	0.253761	-0.0225674	0.093523	0.822773
rs11803128	A	G	0.6541	-0.0177288	0.006	6.852e-11	-0.0238845	0.019187	0.210782	-0.0509868	0.030263	0.084989	-0.0204387	0.029448	0.49137
rs118166957	T	C	0.1591	0.0293838	0.008	1.951e-16	0.0484034	0.027354	0.07039	-0.0056982	0.039628	0.89077	0.0724676	0.04337	0.084617
rs11838830	A	G	0.9436	-0.0347983	0.013	5.196e-10	-0.0482433	0.039197	0.213571	0.0279161	0.054206	0.636273	-0.0746222	0.061797	0.219986
rs12030482	A	T	0.2201	0.0178677	0.007	8.161e-09	0.017157	0.022118	0.440002	-0.00730562	0.032918	0.831243	0.0571258	0.035275	0.097304
rs12187443	T	C	0.6681	0.0174507	0.006	1.641e-10	-0.0239567	0.019385	0.214143	0.0324354	0.028094	0.277639	-0.0349192	0.030044	0.242377
rs12251016	A	T	0.6559	-0.0168249	0.006	3.89e-10	-0.00785308	0.018593	0.676025	-0.0358226	0.029187	0.216192	-0.000768704	0.028387	0.978975
rs12310246	A	G	0.2489	0.0195317	0.007	4.744e-11	-0.00966152	0.0203	0.644244	0.0175874	0.031271	0.578934	-0.00323523	0.031221	0.920257
rs12454003	C	G	0.4821	-0.0150229	0.006	4.94e-09	0.00616695	0.01803	0.735295	0.019634	0.028085	0.487983	-0.0101342	0.02748	0.722563
rs12520974	T	C	0.4846	-0.0154727	0.006	1.685e-09	0.0115925	0.018329	0.52976	-0.00496732	0.027709	0.862278	0.00464121	0.027977	0.871237
rs12540241	A	T	0.1926	-0.0199966	0.008	1.576e-09	0.0574525	0.02447	0.015119	0.0716209	0.037631	0.048455	0.0342594	0.036913	0.354184
rs12605642	T	G	0.4864	0.0153598	0.006	2.129e-09	0.0230786	0.018142	0.200849	0.020857	0.027917	0.457958	0.033749	0.02816	0.227701
rs12614369	A	G	0.8158	0.0191163	0.008	7.214e-09	0.0139864	0.026376	0.610717	0.0380768	0.04	0.379663	0.00364664	0.040489	0.931351
rs12666306	A	G	0.5017	0.0182843	0.006	2.24e-12	0.00464577	0.017957	0.800305	0.0321421	0.026751	0.257725	-0.00143197	0.027799	0.959964
rs12790660	T	C	0.6844	-0.0172766	0.006	4.486e-10	-0.0624864	0.020738	0.001664	-0.0431428	0.031157	0.160593	-0.0689447	0.031949	0.024872
rs1289939	T	C	0.2325	-0.0177288	0.007	5.995e-09	-0.0151989	0.020364	0.471489	-0.00785376	0.031418	0.810136	-0.034193	0.030602	0.295579
rs12912299	T	C	0.4893	-0.0186345	0.006	4.416e-13	-0.0439613	0.017324	0.017098	-0.0212625	0.0272	0.456747	-0.066858	0.025986	0.019289
rs12917449	A	C	0.8061	-0.0181814	0.008	2.965e-08	-0.025194	0.022603	0.263453	-0.041283	0.035988	0.248258	-0.0304177	0.034799	0.383782
rs12924275	T	C	0.268	0.0166155	0.007	1.925e-08	-0.0142561	0.020122	0.493737	-0.0181293	0.03065	0.573523	-0.0289521	0.030409	0.37011
rs12983032	A	G	0.3434	-0.0186345	0.006	1.065e-11	-0.00203808	0.018671	0.914832	0.00420315	0.02873	0.886473	-0.00979986	0.028167	0.737767
rs12991815	C	G	0.4241	0.0174507	0.006	3.015e-11	0.0100612	0.017981	0.578719	-0.00020002	0.027239	0.994303	-0.00515828	0.027161	0.854129
rs13010288	T	G	0.1326	-0.0259491	0.009	9.257e-12	-0.0388656	0.026087	0.163106	0.0268639	0.041778	0.526206	-0.065436	0.039396	0.136023
rs13135092	A	G	0.9175	-0.0385789	0.011	2.527e-16	-0.045003	0.035224	0.196393	-0.0328814	0.051404	0.529843	-0.00462628	0.052185	0.932678
rs13138995	A	G	0.3896	0.0149403	0.006	1.974e-08	-0.0410856	0.017354	0.025656	-0.0325304	0.026838	0.253796	-0.0678346	0.025965	0.017611
rs1357685	T	C	0.4735	0.0145205	0.006	1.385e-08	0.012221	0.018185	0.503977	0.0658617	0.029364	0.019804	-0.0394334	0.026484	0.163795
rs138014720	A	T	0.9406	0.0301948	0.013	3.461e-08	-0.0344594	0.037458	0.358604	-0.0679792	0.058411	0.23886	-0.0239665	0.055732	0.677035
rs138678612	A	G	0.9783	-0.05061	0.02	1.409e-08	0.0303912	0.052574	0.595844	0.126717	0.070124	0.143103	-0.151483	0.093546	0.083366
rs1519102	C	G	0.6891	-0.015923	0.006	1.903e-08	-0.0138339	0.019311	0.476042	-0.0115787	0.029614	0.700921	-0.070259	0.031125	0.01869
rs152555	A	G	0.8544	-0.0227338	0.008	4.831e-10	0.00471409	0.025699	0.858779	0.0195111	0.039087	0.638272	-0.0462269	0.041075	0.257294
rs1530938	A	G	0.4423	0.0157788	0.006	8.823e-10	0.0111209	0.018147	0.542734	0.00446103	0.027634	0.874643	0.000463892	0.027541	0.986907
rs1536053	T	C	0.3157	-0.0163737	0.006	6.043e-09	-0.0212073	0.019415	0.294409	-0.050461	0.028911	0.10749	0.0140045	0.030769	0.654391
rs1553754	T	G	0.5621	-0.0145735	0.006	3.507e-08	-0.0180933	0.018332	0.323574	-0.0732839	0.029817	0.010124	0.00329944	0.02754	0.907508
rs1567084	A	G	0.4981	0.0145205	0.006	2.136e-08	0.00245	0.017862	0.89253	0.00304835	0.0273	0.913204	-0.0291302	0.026585	0.300446
rs1580173	A	G	0.5608	0.0145205	0.006	2.28e-08	-0.0143003	0.018464	0.440382	0.0109619	0.027711	0.703654	-0.00773798	0.028281	0.788622
rs1620977	A	G	0.2696	0.0224284	0.007	2.272e-14	0.00902119	0.019987	0.655213	-0.00326432	0.030168	0.916666	-0.0177964	0.029753	0.568723
rs16903122	T	C	0.2487	0.024075	0.007	9.038e-16	-0.0393366	0.019824	0.061651	-0.0294062	0.030463	0.363751	-0.0331701	0.030501	0.308106
rs16990210	T	C	0.8478	-0.0199966	0.008	1.965e-08	-0.0101048	0.025632	0.697839	-0.0380816	0.040279	0.344983	0.031079	0.037784	0.443386
rs17005118	A	G	0.264	0.0182843	0.007	6.128e-10	0.0226046	0.020867	0.277586	0.0225528	0.032161	0.487126	-0.0145747	0.030885	0.65227
rs17025198	A	G	0.2043	0.0178677	0.007	2.185e-08	-9.20042e-05	0.02141	0.996628	-0.0638881	0.031035	0.061789	0.039387	0.033898	0.242148
rs17083297	A	C	0.1766	-0.0190881	0.008	1.6e-08	0.0262621	0.026698	0.325158	0.00222452	0.038915	0.956052	0.0259426	0.041737	0.540461
rs17223714	A	G	0.7885	0.0199467	0.007	2.435e-10	0.0323083	0.021026	0.145423	0.0991543	0.030405	0.004316	0.0229944	0.032379	0.502077
rs1731951	A	T	0.4434	-0.0150229	0.006	1.355e-08	-0.0191288	0.017836	0.301437	-0.0093203	0.027555	0.744527	0.0121064	0.028217	0.672821
rs17367725	T	C	0.3513	-0.0154727	0.006	9.285e-09	-0.0167332	0.018518	0.383125	-0.00526986	0.028631	0.858789	-0.0226915	0.028244	0.445512
rs17520265	A	G	0.0342	-0.0395292	0.016	2.872e-08	-0.0392649	0.051574	0.488427	-0.120983	0.071856	0.170717	-0.0337812	0.078818	0.703739
rs17643634	T	C	0.165	-0.0259491	0.008	1.341e-13	-0.0302561	0.026149	0.274526	-0.00669134	0.040248	0.874049	-0.00355632	0.041068	0.934027
rs176644	T	G	0.4036	0.0153598	0.006	9.491e-09	0.0158655	0.018387	0.389223	-0.0129464	0.027323	0.649196	0.0244438	0.028464	0.392097
rs1861412	A	G	0.4338	0.0166155	0.006	1.668e-10	0.00882395	0.018141	0.629811	-0.031885	0.026865	0.263527	0.0470544	0.028925	0.097198
rs190073	A	G	0.4141	-0.0145735	0.006	2.857e-08	-0.0285116	0.017638	0.122831	-0.0269571	0.027137	0.347059	-0.00357037	0.027633	0.900325
rs1927902	T	C	0.2542	0.0228406	0.007	1.147e-14	0.0325495	0.021132	0.118959	0.00489998	0.031463	0.879456	0.0336881	0.032505	0.298989
rs1937447	C	G	0.7593	-0.0168249	0.007	2.075e-08	-0.0325592	0.024158	0.173742	-0.0841169	0.039296	0.024789	-0.0112969	0.036643	0.763728
rs2030672	C	G	0.5589	0.0149403	0.006	1.098e-08	-0.0223337	0.018811	0.233212	-0.0632696	0.029871	0.028269	0.00511606	0.028023	0.859818
rs2089358	T	C	0.7038	-0.0177288	0.007	2.745e-10	0.0172296	0.019453	0.393352	0.00723007	0.030099	0.81705	0.011853	0.029929	0.704221
rs214934	A	T	0.3123	-0.0163737	0.006	3.163e-09	0.0166899	0.01955	0.394432	0.0571428	0.031454	0.061916	0.0124304	0.029909	0.682918
rs2216427	C	G	0.6527	0.0153598	0.006	1.595e-08	0.0278945	0.01818	0.143017	-9.9995e-05	0.028246	0.99725	0.0428971	0.02767	0.149081
rs2221119	C	G	0.443	0.0157788	0.006	2.003e-09	0.0306786	0.01926	0.106908	0.017833	0.029343	0.547844	0.0334561	0.02969	0.257585
rs224029	T	C	0.3995	-0.0168249	0.006	2.507e-10	0.0134442	0.018374	0.466431	0.020523	0.028158	0.46927	0.0155623	0.028111	0.584475
rs2286729	A	G	0.0862	0.0301948	0.011	5.374e-11	-0.0491955	0.033477	0.176935	-0.100072	0.049403	0.083134	-0.0256338	0.051923	0.648689
rs2364921	T	C	0.4691	-0.0145735	0.006	2.129e-08	0.00737375	0.017848	0.682583	-0.00986045	0.026975	0.724704	-0.000727264	0.027224	0.979258
rs2388840	A	G	0.5757	-0.015923	0.006	1.368e-09	-0.0064114	0.018375	0.730241	-0.00935411	0.028225	0.744979	0.00210622	0.028036	0.941891
rs2389631	A	C	0.6666	-0.0172766	0.006	2.027e-10	-0.0292782	0.019121	0.121642	-0.0436695	0.029888	0.138032	0.00031705	0.028616	0.991409
rs2398144	A	C	0.3947	0.0166155	0.006	5.091e-10	0.0220266	0.018312	0.227038	-0.0128249	0.02707	0.6491	0.0577188	0.029131	0.04117
rs2431108	T	C	0.672	-0.0231917	0.006	7.83e-17	0.0213564	0.018655	0.271502	0.0147787	0.028752	0.622852	-0.0175452	0.029757	0.560129
rs2447094	A	C	0.4687	-0.0145735	0.006	2.503e-08	-0.0398839	0.017016	0.026921	-0.0168837	0.02671	0.545301	-0.0551872	0.025633	0.047403
rs2491124	T	C	0.5758	0.0211893	0.006	8.809e-16	0.0175338	0.018215	0.353105	0.0838295	0.026123	0.004142	0.0289295	0.027676	0.323689
rs2598293	T	C	0.4763	0.0153598	0.006	2.478e-09	-0.00855045	0.018283	0.648946	-0.00991398	0.028012	0.733392	0.046034	0.029449	0.11154
rs2737240	A	G	0.7076	0.0157788	0.007	3.373e-08	-0.0513801	0.020994	0.011566	-0.0298869	0.031544	0.343824	-0.0450957	0.031978	0.152525
rs2792990	C	G	0.8553	0.0236639	0.008	1.152e-10	-0.00901524	0.025606	0.729091	-0.0599062	0.041369	0.139392	0.00323824	0.038611	0.935918
rs2815757	T	C	0.8089	0.024075	0.008	2.238e-13	-0.0312952	0.024919	0.205892	-0.0563539	0.039504	0.146127	-0.0338834	0.038709	0.383273
rs2838787	A	G	0.3924	-0.0154727	0.006	7.654e-09	-0.0284273	0.017711	0.125501	-0.00317504	0.027701	0.911514	-0.030653	0.026951	0.283382
rs28552587	A	G	0.5641	0.0145205	0.006	3.299e-08	0.00341482	0.017928	0.852068	0.0418548	0.026339	0.138174	-0.0186078	0.028181	0.512938
rs28582096	A	G	0.205	-0.02365	0.007	1.738e-13	-0.0155117	0.023351	0.523018	0.0134975	0.036451	0.717419	-0.0469847	0.034809	0.2145
rs28611339	T	G	0.1282	0.0253059	0.009	8.456e-11	0.00364335	0.026791	0.894262	-0.00267658	0.040605	0.949685	0.0204132	0.041749	0.632134
rs2867690	T	C	0.1819	0.0182843	0.008	3.701e-08	-0.00174452	0.02266	0.940081	0.0243579	0.035398	0.495923	0.00342014	0.03489	0.92431
rs2903385	A	G	0.4844	0.0187005	0.006	4.527e-13	0.0305282	0.018501	0.094699	0.0103799	0.027904	0.714691	0.0436905	0.02878	0.122906
rs3131638	A	G	0.2261	-0.0190881	0.007	7.88e-10	0.0200653	0.022605	0.375688	0.101946	0.037969	0.004091	-0.0376718	0.032951	0.287474
rs314281	T	C	0.4531	-0.0186345	0.006	6.029e-13	-0.0175979	0.017503	0.331753	-0.0355951	0.026363	0.204872	-0.0117761	0.02705	0.675517
rs3184470	A	G	0.3507	-0.0163737	0.006	9.726e-10	-0.00456842	0.018464	0.808947	0.0117863	0.029009	0.68957	-0.0215454	0.027791	0.460861
rs324017	A	C	0.294	0.0170333	0.007	1.609e-09	0.0337664	0.020267	0.091031	0.0535341	0.031826	0.085144	0.0676605	0.03212	0.028763
rs34036083	T	C	0.6576	-0.0154727	0.006	2.066e-08	-0.00678096	0.019122	0.726094	-0.0139749	0.029513	0.64099	0.0310016	0.028141	0.299556
rs34214423	A	C	0.8087	0.0195317	0.008	3.178e-09	0.0109143	0.022206	0.634537	0.0341764	0.032844	0.331165	-0.0138842	0.03498	0.697501
rs34490907	C	G	0.8878	0.0232525	0.009	1.755e-08	-0.025348	0.030903	0.414376	-0.033897	0.047413	0.480298	-0.039859	0.047748	0.407083
rs34967082	A	G	0.4136	0.0153598	0.006	4.34e-09	-0.0127074	0.018162	0.497603	-0.0256266	0.027615	0.379303	0.0124719	0.028627	0.66808
rs35110063	A	G	0.4266	0.0170333	0.006	8.817e-11	0.0235134	0.018463	0.200298	-0.0180764	0.027287	0.526945	0.0175452	0.028231	0.538491
rs35322724	A	C	0.5774	0.0211893	0.006	3.753e-16	0.0180621	0.017648	0.323457	-0.00311315	0.027616	0.912398	0.0277042	0.026809	0.328182
rs35539975	A	G	0.7785	0.0182843	0.007	4.492e-09	0.0305293	0.020709	0.161586	0.0302108	0.032132	0.377617	-0.0223112	0.033232	0.506444
rs37445	A	G	0.3905	-0.0154727	0.006	4.882e-09	0.0137777	0.018543	0.459477	0.0066856	0.028343	0.817416	0.04831	0.029408	0.093681
rs3774751	T	G	0.4621	-0.0177288	0.006	7.322e-12	-0.0101514	0.017684	0.576713	-0.0241769	0.026787	0.39138	-0.0129292	0.02715	0.647469
rs3902952	T	C	0.1881	0.0207755	0.008	2.545e-10	0.0343976	0.023315	0.135425	-0.00590138	0.034576	0.869865	0.0335083	0.035447	0.345006
rs4090240	T	C	0.2775	-0.0168249	0.007	8.455e-09	0.0414931	0.020778	0.041303	0.00448791	0.030887	0.887446	0.0611214	0.032516	0.052677
rs4238755	A	C	0.2638	-0.0186345	0.007	2.299e-10	0.0232692	0.020559	0.256162	0.00638656	0.031154	0.841468	0.00441823	0.031081	0.889911
rs4260410	T	C	0.332	0.0149403	0.006	4.869e-08	-0.0303231	0.018415	0.116987	-0.00943436	0.028984	0.754215	-0.0791287	0.026975	0.008507
rs429358	T	C	0.8458	0.0199467	0.008	2.125e-08	0.0201221	0.02673	0.472828	0.0100928	0.041528	0.817648	0.0179339	0.040846	0.679315
rs4502882	T	C	0.6578	-0.0168249	0.006	7.961e-10	0.00691183	0.018662	0.718131	0.0491262	0.027429	0.097603	-0.0308386	0.029618	0.29679
rs45453598	A	T	0.169	0.0203613	0.008	4.422e-09	-0.0490894	0.030107	0.132625	-0.0264559	0.04674	0.599683	-0.157873	0.041152	0.001824
rs4588900	A	G	0.5164	0.0145205	0.006	1.571e-08	-0.0197771	0.018196	0.276079	-0.00805944	0.027472	0.773513	-0.00465813	0.027495	0.86846
rs4592425	T	G	0.6965	0.0174507	0.006	4.31e-10	0.0229452	0.019447	0.258247	0.021758	0.029744	0.487555	0.0422219	0.029387	0.181685
rs4643373	T	C	0.7006	0.0178677	0.007	1.582e-10	-0.00475368	0.019854	0.813508	0.00557451	0.030122	0.858305	-0.0109508	0.03038	0.723656
rs4664299	T	C	0.2349	-0.0177288	0.007	4.953e-09	-0.0179522	0.020786	0.40619	-0.0148791	0.031419	0.651399	-0.0332838	0.031448	0.321797
rs4699157	T	C	0.958	-0.0352691	0.015	3.981e-08	-0.0459891	0.05297	0.388017	0.0519693	0.071791	0.52548	-0.0576414	0.081617	0.490133
rs4702	A	G	0.5562	-0.0209071	0.006	6.777e-16	-0.0113197	0.017996	0.531997	-0.0315781	0.028059	0.258324	-0.0355418	0.028249	0.204585
rs4709655	T	C	0.1191	-0.02365	0.009	3.088e-09	-0.00135091	0.027481	0.961906	-0.00325329	0.041137	0.939727	0.0376348	0.043948	0.394343
rs4767645	T	G	0.4614	-0.015923	0.006	6.47e-10	0.00487609	0.017945	0.788492	-0.0055373	0.027109	0.843301	-0.00337469	0.027179	0.904146
rs4788203	A	G	0.4334	-0.0150229	0.006	6.323e-09	-0.00771771	0.018197	0.679443	-0.0095757	0.027922	0.741263	0.0140528	0.028496	0.626839
rs4790076	T	C	0.1742	0.0207755	0.008	1.757e-09	-0.00725727	0.024476	0.773968	0.00522433	0.037754	0.893441	-0.00436752	0.037536	0.911191
rs4858708	A	T	0.5305	-0.0145735	0.006	1.226e-08	0.0448478	0.016926	0.012824	0.0835349	0.02504	0.002836	0.0204854	0.026684	0.464266
rs492858	T	C	0.0759	-0.0287242	0.011	3.458e-09	-0.0143079	0.031938	0.669068	-0.0773574	0.045524	0.134731	0.0838318	0.052807	0.10042
rs4981170	A	G	0.1943	-0.02365	0.008	7.331e-13	0.0067154	0.022695	0.770848	-0.00485376	0.034515	0.892491	0.0155239	0.03498	0.663325
rs521484	A	G	0.7668	-0.0172766	0.007	1.53e-08	0.0258267	0.020558	0.230588	0.0140847	0.031597	0.670434	0.0030015	0.032032	0.927914
rs524859	A	G	0.3601	-0.0190881	0.006	1.478e-12	0.00991568	0.018966	0.604317	0.0422373	0.029808	0.150897	-0.0133193	0.028453	0.653646
rs55772859	A	C	0.3106	0.0182843	0.006	4.821e-11	-0.00586919	0.01888	0.761675	-0.0212155	0.028439	0.478118	0.00371609	0.029027	0.900631
rs55972276	A	C	0.1366	0.0318123	0.009	4.19e-17	0.0311924	0.029422	0.287802	0.00341118	0.043692	0.940238	0.0371098	0.045314	0.416223
rs56097173	T	C	0.6808	0.0174507	0.006	2.693e-10	0.0162219	0.018957	0.408841	0.00953229	0.029259	0.754086	0.0497324	0.028087	0.101938
rs56133505	A	G	0.5369	0.0178677	0.006	5.591e-12	-0.0246946	0.018358	0.175573	-0.0412379	0.028477	0.142006	-0.0239021	0.027975	0.394524
rs566673	T	G	0.5351	-0.0168249	0.006	1.18e-10	-0.0152452	0.018991	0.423663	-0.0620232	0.030542	0.035806	-0.00709378	0.029074	0.81134
rs5877	T	C	0.6691	0.0157788	0.006	1.228e-08	0.00935462	0.018722	0.627135	-0.0108331	0.029016	0.713863	0.00365668	0.02873	0.901919
rs6019663	T	C	0.293	0.0174507	0.007	6.474e-10	0.0111486	0.019801	0.576618	-0.0196345	0.02936	0.524594	0.020083	0.030524	0.514814
rs60565673	T	G	0.6211	-0.0186345	0.006	1.591e-12	0.0141202	0.018177	0.452067	0.0147736	0.027931	0.612487	-0.00405377	0.028436	0.889317
rs6119267	C	G	0.6891	-0.0259491	0.006	2.32e-20	-0.00896073	0.019464	0.648649	0.00859886	0.029865	0.781811	-0.00767448	0.029832	0.801324
rs61765555	T	C	0.2552	-0.0195421	0.007	3.999e-11	-0.0208131	0.021624	0.356448	-0.0297739	0.032602	0.391471	-0.0112703	0.033604	0.748636
rs61921611	T	C	0.692	-0.0190881	0.006	7.839e-12	-0.0101731	0.019371	0.602718	0.00500249	0.028998	0.867576	-0.0292578	0.030273	0.333927
rs62068188	T	C	0.8339	0.0211893	0.008	1.184e-09	-0.013755	0.025845	0.598918	-0.00481439	0.039126	0.905361	-0.0231636	0.040054	0.569468
rs62149809	A	G	0.986	0.0640834	0.025	5.713e-09	-0.0912574	0.123393	0.473332	-0.334944	0.22201	0.078356	-0.061256	0.180166	0.766153
rs62158170	A	G	0.7856	0.0285713	0.007	1.203e-19	-0.00315801	0.02194	0.887626	0.00772577	0.033138	0.822996	-0.0249921	0.034342	0.470682
rs62194948	C	G	0.275	0.0170333	0.007	4.644e-09	-0.0190197	0.020842	0.38069	-0.00462066	0.032592	0.891378	-0.0573463	0.03087	0.089639
rs62213452	T	G	0.2788	0.0161974	0.007	2.385e-08	-0.00226256	0.02057	0.91438	-0.00316801	0.031575	0.9228	0.0111714	0.031863	0.731242
rs62264767	A	C	0.8531	0.0281644	0.008	1.634e-14	0.0621574	0.02361	0.015862	0.124734	0.034656	0.002273	0.00457847	0.037616	0.907136
rs62301574	C	G	0.7996	-0.0181814	0.007	1.37e-08	0.0039779	0.021589	0.857442	0.00287312	0.032798	0.932643	-0.0212682	0.033661	0.532425
rs623025	T	C	0.2552	-0.0163737	0.007	3.159e-08	-0.0147442	0.020056	0.4778	-0.00341181	0.030936	0.915136	-0.00441272	0.03105	0.890928
rs62383308	A	G	0.0805	-0.0259491	0.011	3.975e-08	0.00916091	0.035629	0.802272	-0.0568974	0.051549	0.324169	-0.0109346	0.053058	0.846994
rs62429521	A	C	0.1456	0.0220157	0.008	1.776e-09	-0.0191747	0.023911	0.442652	-0.0124633	0.037274	0.750592	-0.0455006	0.035303	0.23545
rs6457796	T	C	0.7313	-0.0168249	0.007	1.12e-08	-0.0134136	0.020347	0.512557	0.00432534	0.030416	0.89076	-0.0264949	0.031572	0.403448
rs6465151	T	C	0.1134	0.0244857	0.009	1.902e-09	0.0120205	0.026961	0.660433	0.0228294	0.041637	0.590405	0.0126822	0.041164	0.764625
rs647905	T	C	0.5409	0.0145205	0.006	2.872e-08	0.00432936	0.017998	0.814004	-0.0052681	0.027763	0.852789	0.0331225	0.026813	0.245092
rs6510033	A	G	0.7253	-0.015923	0.007	4.661e-08	-0.022142	0.020961	0.289963	0.00547798	0.031197	0.865608	-0.0733527	0.033689	0.023204
rs6545798	A	T	0.4104	-0.0177288	0.006	1.186e-11	-0.00828119	0.018045	0.654904	-0.00841329	0.027554	0.768414	-0.0220943	0.027289	0.441258
rs6562066	T	C	0.3688	0.0170333	0.006	1.379e-10	0.0109409	0.018279	0.552306	0.0385994	0.028624	0.172741	-0.0356821	0.02681	0.211641
rs6589988	A	G	0.6757	-0.0163737	0.006	4.699e-09	-0.0286108	0.019527	0.138986	0.0139062	0.028541	0.64069	-0.0431227	0.030327	0.14931
rs6597649	T	C	0.3994	0.0145205	0.006	3.048e-08	-0.00121073	0.018236	0.948077	-0.0316806	0.027114	0.271032	-0.0359412	0.026879	0.209685
rs6601080	A	G	0.6762	0.0153598	0.006	2.211e-08	-0.0286263	0.01962	0.140686	-0.0569397	0.031136	0.060181	-0.0328911	0.030288	0.275832
rs6606731	A	T	0.1923	0.0187005	0.008	1.506e-08	-0.0141415	0.022783	0.549849	-0.00183969	0.03511	0.959723	-0.0095646	0.035239	0.795361
rs66674044	A	T	0.8573	-0.0259491	0.009	2.184e-12	-0.00730128	0.02617	0.784224	0.0134693	0.039777	0.748437	0.0584812	0.037503	0.157732
rs667730	T	C	0.5788	0.0145205	0.006	2.263e-08	0.00886114	0.017835	0.628611	0.0197926	0.027002	0.484526	-0.0184743	0.028073	0.514368
rs6702604	A	G	0.5843	-0.015923	0.006	1.303e-09	-0.002001	0.018121	0.913439	0.0070085	0.027528	0.805775	0.014867	0.027375	0.60283
rs670501	T	C	0.2133	0.0228406	0.007	7.398e-13	0.0128994	0.021445	0.550806	0.0836295	0.035208	0.012451	-0.0172245	0.031718	0.605371
rs671985	A	G	0.4516	-0.0163737	0.006	2.79e-10	-0.0127307	0.017612	0.4832	-0.0042922	0.027236	0.878635	-0.0600176	0.025737	0.03264
rs6734957	T	G	0.2388	-0.0181814	0.007	1.817e-09	-0.0123773	0.021704	0.581645	-0.0211174	0.033244	0.547859	-0.0132261	0.033126	0.703295
rs67501351	C	G	0.7451	0.0195317	0.007	5.363e-11	-0.0197467	0.020694	0.340181	0.000899404	0.031265	0.977769	-0.018596	0.031777	0.563442
rs6756610	C	G	0.6291	0.0161974	0.006	1.135e-09	0.00472816	0.018548	0.803331	-0.0250233	0.029237	0.393773	0.036076	0.027407	0.2172
rs6808140	T	C	0.5053	0.0170333	0.006	5.351e-11	0.0213064	0.018592	0.250257	0.0264968	0.028607	0.35501	-0.00263547	0.027912	0.927034
rs6888135	A	C	0.4965	0.0166155	0.006	1.207e-10	-0.0186101	0.017356	0.301038	-0.00518743	0.026874	0.851722	-0.0501855	0.025851	0.072402
rs694786	T	C	0.4605	-0.0190881	0.006	1.969e-13	-0.0180957	0.017555	0.319974	-0.0269016	0.026665	0.339314	-0.0226987	0.026932	0.422891
rs6967168	T	G	0.7544	-0.0190881	0.007	1.39e-10	0.0251578	0.020585	0.243208	0.0154294	0.031995	0.645856	0.0269016	0.03147	0.420537
rs6973090	A	G	0.25	-0.0163737	0.007	4.312e-08	0.0369287	0.025982	0.150344	0.0588084	0.041001	0.14351	0.0156529	0.039255	0.69693
rs6978112	T	C	0.4105	0.0149403	0.006	2.11e-08	0.0105185	0.018562	0.573939	-0.0105343	0.02798	0.717273	-0.00851213	0.028089	0.770238
rs699844	A	G	0.9195	0.0261245	0.011	4.11e-08	0.0452327	0.034129	0.221733	0.0592374	0.050878	0.299162	0.0758492	0.050537	0.188323
rs701394	A	G	0.6376	-0.0154727	0.006	6.826e-09	0.0135849	0.01856	0.478559	0.00205311	0.028681	0.944637	0.019917	0.028141	0.500268
rs7040224	A	G	0.3161	0.0161974	0.006	4.242e-09	0.046266	0.01993	0.017067	0.0388091	0.03014	0.193521	0.0862089	0.031642	0.003932
rs7044885	C	G	0.4417	-0.0177288	0.006	5.673e-12	-0.0368787	0.017203	0.042398	-0.0452788	0.026278	0.109147	-0.0297718	0.026685	0.292097
rs715338	A	G	0.5776	0.0178677	0.006	7.853e-12	-0.00474771	0.018028	0.794912	-0.0138329	0.027818	0.62379	0.0282431	0.026855	0.319974
rs71575448	A	G	0.8602	0.0220157	0.009	3.38e-09	0.0294113	0.027707	0.316505	-0.000785691	0.043399	0.986153	0.013144	0.043279	0.774375
rs7168238	C	G	0.0743	0.0277572	0.011	1.798e-08	0.00462728	0.032093	0.88842	-0.0439467	0.046227	0.38648	0.0634536	0.051088	0.207583
rs7214267	A	G	0.581	-0.0190881	0.006	5.093e-13	-0.0467586	0.019056	0.011585	-0.0349839	0.028654	0.218769	-0.0277426	0.028825	0.336006
rs72657797	T	C	0.1759	-0.0241089	0.008	1.522e-12	-0.019966	0.027326	0.486166	-0.00470807	0.042235	0.91535	-0.00176456	0.042626	0.968429
rs72773790	T	C	0.6732	0.0161974	0.006	3.714e-09	-0.00588565	0.019804	0.769427	0.00302156	0.030123	0.922694	0.0135494	0.029712	0.662514
rs728017	A	G	0.3864	-0.0150229	0.006	9.509e-09	-0.0239546	0.017752	0.195704	-0.0320254	0.027039	0.264652	-0.0256112	0.027169	0.371593
rs72820274	A	G	0.417	0.0149403	0.006	1.279e-08	0.0567442	0.019013	0.001925	0.0856886	0.030027	0.002502	0.0549985	0.029165	0.052641
rs72899452	T	C	0.0648	0.0322157	0.012	1.002e-09	0.0400463	0.036306	0.267679	0.0756843	0.056696	0.172445	-0.0137511	0.052016	0.804883
rs73079014	T	C	0.126	-0.0213631	0.009	3.647e-08	-0.109566	0.026383	0.000304	-0.0978245	0.041394	0.040808	-0.0819185	0.040689	0.076164
rs73163783	T	C	0.7232	-0.0163737	0.007	1.393e-08	-0.0229291	0.020637	0.265176	-0.0159068	0.031313	0.616813	0.0137004	0.030369	0.666182
rs73671843	A	G	0.1257	-0.0241089	0.009	5.492e-10	0.0326259	0.027738	0.236808	0.0594946	0.042726	0.155958	-0.0118904	0.041007	0.783531
rs7402939	T	C	0.376	-0.0154727	0.006	5.191e-09	-0.0365011	0.017618	0.049827	-0.0199425	0.027355	0.487128	-0.0411127	0.026843	0.152927
rs742760	A	T	0.8155	0.0187005	0.008	2.475e-08	0.00191483	0.02281	0.934721	0.0228521	0.034173	0.52809	-0.00117631	0.034977	0.974067
rs7432782	T	C	0.9558	-0.0362122	0.014	7.417e-09	-0.0376685	0.04944	0.451077	0.0179522	0.070636	0.816844	0.0513322	0.070501	0.52216
rs7475916	C	G	0.3533	-0.015923	0.006	6.7e-09	-0.00472515	0.018988	0.80799	-0.0186325	0.028655	0.535427	0.00184729	0.029042	0.950618
rs7486418	T	G	0.657	0.0178677	0.006	6.837e-11	0.00995539	0.018562	0.60225	0.0333996	0.028107	0.264309	-0.018272	0.029108	0.534463
rs75452188	A	G	0.878	0.0224284	0.009	1.583e-08	0.00792028	0.026442	0.772328	0.0428772	0.038853	0.310255	0.00548099	0.040471	0.897139
rs7566062	T	C	0.2248	0.0257154	0.007	1.369e-16	0.0154313	0.021595	0.47742	0.00376889	0.032684	0.910797	0.038174	0.033953	0.25835
rs7571486	A	G	0.251	-0.0168249	0.007	1.403e-08	0.026041	0.020343	0.197679	-0.00218438	0.030306	0.944369	0.0519195	0.032011	0.097528
rs75932578	T	C	0.2159	-0.0172766	0.007	4.149e-08	0.0147625	0.021875	0.502667	0.00859496	0.033014	0.799438	0.00695774	0.033512	0.839779
rs7599697	T	C	0.3583	-0.015923	0.006	4.999e-09	0.00432364	0.018994	0.82247	0.00649387	0.029262	0.828235	0.0312448	0.030026	0.297078
rs76145129	T	G	0.1238	-0.0218195	0.009	2.733e-08	-0.110267	0.025043	0.000127	-0.106034	0.037883	0.015886	-0.136843	0.037124	0.002088
rs7615602	C	G	0.2715	-0.0172766	0.007	2.589e-09	-0.0272756	0.019036	0.171474	-0.042562	0.028515	0.165031	-0.0495748	0.028433	0.107351
rs7625896	A	G	0.6545	0.0157788	0.006	5.279e-09	0.0139448	0.018641	0.469104	0.00483668	0.028916	0.871558	0.00996145	0.028655	0.738151
rs78206187	A	G	0.9442	-0.0409586	0.013	2.955e-13	0.00468094	0.042436	0.916254	0.024347	0.063067	0.724571	0.064306	0.061615	0.360602
rs79204944	A	G	0.0449	0.0342273	0.014	4.244e-08	0.106474	0.046705	0.015121	0.117026	0.070623	0.08089	0.110271	0.072107	0.110251
rs79693059	C	G	0.9158	-0.0315171	0.011	1.607e-11	0.0315319	0.032816	0.36822	0.00309478	0.04997	0.953213	-0.00338327	0.052012	0.95063
rs7992992	A	G	0.1286	0.0220157	0.009	1.152e-08	0.0721848	0.028445	0.007917	0.0973907	0.044293	0.019991	0.119742	0.045467	0.00439
rs8076183	T	C	0.4485	-0.0163737	0.006	2.754e-10	-0.00541966	0.017956	0.768128	-0.0424076	0.026486	0.135511	0.0192701	0.028098	0.496467
rs8180457	T	C	0.1573	-0.0241089	0.008	1.12e-11	0.0189797	0.024862	0.447693	-0.0323404	0.036711	0.411759	0.0585217	0.039248	0.127781
rs8180817	C	G	0.4304	-0.0213631	0.006	1.831e-16	-0.00140499	0.017845	0.938432	-0.0156295	0.026978	0.578989	8.59963e-05	0.027492	0.997578
rs8181889	A	G	0.3992	-0.0163737	0.006	8.898e-10	0.0246292	0.019409	0.201837	-0.0119592	0.028799	0.690275	0.0557705	0.031066	0.065337
rs823247	T	C	0.479	-0.015923	0.006	5.246e-10	-0.0271965	0.017732	0.142705	-0.0381745	0.026975	0.185349	-0.0231499	0.027497	0.423864
rs830716	C	G	0.7133	0.0195317	0.007	8.676e-12	-0.0256483	0.020454	0.207201	-0.027443	0.031332	0.382617	-0.0514713	0.031959	0.10004
rs871994	A	C	0.4352	0.0153598	0.006	5.498e-09	-0.000766294	0.017938	0.966536	-0.0457613	0.026268	0.105463	-0.00452623	0.027517	0.873446
rs874168	T	C	0.5254	0.0149403	0.006	7.946e-09	0.0304262	0.017279	0.093325	0.000497124	0.027306	0.985868	0.037434	0.026319	0.182495
rs908668	T	C	0.2081	0.0216027	0.007	1.411e-11	-0.0350574	0.021245	0.119071	-0.0206671	0.032988	0.553067	-0.0596693	0.031656	0.086058
rs910187	A	G	0.373	-0.0150229	0.006	1.631e-08	-0.000680231	0.01875	0.971602	-0.00292929	0.028752	0.92136	-0.0108577	0.028341	0.712713
rs9316619	T	C	0.8249	0.0199467	0.008	5.503e-09	-0.0216274	0.024016	0.368722	-0.0457054	0.037317	0.21617	-0.00691206	0.036316	0.853375
rs9373590	A	T	0.5078	0.0174507	0.006	2.18e-11	-0.00448404	0.017652	0.80375	-0.000870379	0.027148	0.975123	-0.00623339	0.026915	0.822747
rs9394502	T	C	0.3343	-0.02365	0.006	7.756e-18	0.0112851	0.019034	0.556216	0.0407455	0.029851	0.167138	-0.00225354	0.028712	0.939341
rs940780	T	C	0.3588	0.0166155	0.006	8.498e-10	-0.00572938	0.018788	0.766027	0.0149566	0.029235	0.613926	0.0295044	0.029911	0.32375
rs9469434	C	G	0.2851	-0.0154727	0.007	4.413e-08	0.0318203	0.020284	0.112274	0.0141869	0.030913	0.651699	0.0250906	0.030967	0.420262
rs9527083	A	G	0.6705	-0.0329203	0.006	1.611e-32	0.00758872	0.01866	0.69202	-0.00857315	0.029099	0.772842	0.0409293	0.027653	0.167494
rs9540729	A	T	0.4794	0.0157788	0.006	1.403e-09	0.0349752	0.018447	0.053742	0.0206483	0.027721	0.459323	0.0456596	0.028486	0.102549
rs9563886	T	C	0.6063	-0.0145735	0.006	3.078e-08	-0.0203535	0.01854	0.271192	-0.0479498	0.029077	0.09245	-0.0241364	0.02853	0.399348
rs9889282	A	C	0.6129	-0.0181814	0.006	4.697e-12	-0.0219581	0.01861	0.236212	-0.0522603	0.029549	0.070026	-0.0169486	0.028636	0.558441
rs9931543	T	C	0.7359	0.0207755	0.007	1.111e-12	0.0156783	0.020276	0.455831	0.00723209	0.031286	0.824051	0.0478372	0.030174	0.143192
rs9964420	A	C	0.301	0.0153598	0.007	4.54e-08	0.0163614	0.020152	0.418435	0.0170164	0.031067	0.589033	0.0201888	0.031091	0.520511

## Sheet: S table 2
S table 2. Results of single SNP analysis in the MR of lung cancer, lung adenocarcinoma and lung squamous cell carcinoma.
SNP	Lung cancer				Lung adenocarcinoma				Lung squamous cell carcinoma
	Result from IVW with all the SNPs		Results of single SNP analysis		Result from IVW with all the SNPs		Results of single SNP analysis		Result from IVW with all the SNPs		Results of single SNP analysis
	OR (95%CI)	P-value	OR (95%CI)	P-value	OR (95%CI)	P-value	OR (95%CI)	P-value	OR (95%CI)	P-value	OR (95%CI)	P-value
rs1015438	1.35 (1.14 - 1.59)	0.000343825	2.65 (0.46 - 15.11)	0.273332	1.35 (1.07 - 1.70)	0.0115768	1.67 (0.12 - 23.32)	0.704783	1.35 (1.06 - 1.72)	0.0165502	1.22 (0.09 - 16.59)	0.879079
rs1031654	1.35 (1.14 - 1.59)	0.000343825	2.49 (0.35 - 17.86)	0.363293	1.35 (1.07 - 1.70)	0.0115768	1.89 (0.10 - 37.32)	0.676888	1.35 (1.06 - 1.72)	0.0165502	4.39 (0.21 - 90.91)	0.339192
rs1038093	1.35 (1.14 - 1.59)	0.000343825	0.72 (0.09 - 6.01)	0.762358	1.35 (1.07 - 1.70)	0.0115768	0.66 (0.03 - 16.54)	0.797744	1.35 (1.06 - 1.72)	0.0165502	1.54 (0.06 - 37.60)	0.792821
rs10502966	1.35 (1.14 - 1.59)	0.000343825	1.37 (0.17 - 11.15)	0.770939	1.35 (1.07 - 1.70)	0.0115768	2.47 (0.10 - 63.93)	0.585346	1.35 (1.06 - 1.72)	0.0165502	0.41 (0.02 - 9.42)	0.575168
rs1064213	1.35 (1.14 - 1.59)	0.000343825	0.92 (0.10 - 8.30)	0.939653	1.35 (1.07 - 1.70)	0.0115768	1.95 (0.07 - 53.59)	0.693877	1.35 (1.06 - 1.72)	0.0165502	0.23 (0.01 - 7.31)	0.407261
rs10756571	1.35 (1.14 - 1.59)	0.000343825	1.14 (0.10 - 12.78)	0.914842	1.35 (1.07 - 1.70)	0.0115768	0.45 (0.01 - 19.84)	0.682145	1.35 (1.06 - 1.72)	0.0165502	0.18 (0.00 - 7.99)	0.374363
rs10758593	1.35 (1.14 - 1.59)	0.000343825	0.88 (0.09 - 8.66)	0.913483	1.35 (1.07 - 1.70)	0.0115768	0.92 (0.03 - 30.77)	0.964658	1.35 (1.06 - 1.72)	0.0165502	71.37 (2.67 - 1907.24)	0.0108971
rs10761240	1.35 (1.14 - 1.59)	0.000343825	0.14 (0.02 - 0.97)	0.0468503	1.35 (1.07 - 1.70)	0.0115768	0.15 (0.01 - 3.11)	0.220961	1.35 (1.06 - 1.72)	0.0165502	0.07 (0.00 - 1.49)	0.0879094
rs10800992	1.35 (1.14 - 1.59)	0.000343825	0.62 (0.09 - 4.19)	0.623271	1.35 (1.07 - 1.70)	0.0115768	0.33 (0.02 - 5.98)	0.453521	1.35 (1.06 - 1.72)	0.0165502	0.56 (0.03 - 10.48)	0.694548
rs10825503	1.35 (1.14 - 1.59)	0.000343825	0.89 (0.08 - 9.83)	0.921259	1.35 (1.07 - 1.70)	0.0115768	3.89 (0.09 - 171.71)	0.481788	1.35 (1.06 - 1.72)	0.0165502	1.18 (0.03 - 47.51)	0.929963
rs10865954	1.35 (1.14 - 1.59)	0.000343825	9.86 (1.21 - 80.60)	0.0328442	1.35 (1.07 - 1.70)	0.0115768	36.01 (1.35 - 959.55)	0.0323807	1.35 (1.06 - 1.72)	0.0165502	9.25 (0.36 - 236.07)	0.178439
rs10898940	1.35 (1.14 - 1.59)	0.000343825	2.50 (0.18 - 34.06)	0.492429	1.35 (1.07 - 1.70)	0.0115768	0.92 (0.02 - 53.68)	0.968811	1.35 (1.06 - 1.72)	0.0165502	3.55 (0.07 - 189.59)	0.532625
rs10928256	1.35 (1.14 - 1.59)	0.000343825	0.67 (0.06 - 7.29)	0.746098	1.35 (1.07 - 1.70)	0.0115768	0.02 (0.00 - 0.49)	0.0183348	1.35 (1.06 - 1.72)	0.0165502	3.87 (0.09 - 160.72)	0.477123
rs10944696	1.35 (1.14 - 1.59)	0.000343825	0.76 (0.08 - 7.64)	0.816678	1.35 (1.07 - 1.70)	0.0115768	1.84 (0.06 - 60.00)	0.730613	1.35 (1.06 - 1.72)	0.0165502	0.48 (0.01 - 16.98)	0.68695
rs10947428	1.35 (1.14 - 1.59)	0.000343825	5.38 (1.11 - 26.22)	0.0371146	1.35 (1.07 - 1.70)	0.0115768	5.22 (0.47 - 57.99)	0.178857	1.35 (1.06 - 1.72)	0.0165502	9.39 (0.79 - 111.41)	0.075862
rs10947690	1.35 (1.14 - 1.59)	0.000343825	0.49 (0.07 - 3.52)	0.475619	1.35 (1.07 - 1.70)	0.0115768	1.15 (0.05 - 25.82)	0.931661	1.35 (1.06 - 1.72)	0.0165502	1.91 (0.08 - 43.20)	0.685674
rs10947987	1.35 (1.14 - 1.59)	0.000343825	0.57 (0.05 - 7.22)	0.66522	1.35 (1.07 - 1.70)	0.0115768	5.59 (0.13 - 248.72)	0.37414	1.35 (1.06 - 1.72)	0.0165502	0.92 (0.02 - 44.77)	0.9676
rs10955647	1.35 (1.14 - 1.59)	0.000343825	0.53 (0.05 - 6.12)	0.611756	1.35 (1.07 - 1.70)	0.0115768	0.05 (0.00 - 2.42)	0.130121	1.35 (1.06 - 1.72)	0.0165502	0.62 (0.01 - 26.09)	0.803142
rs11001276	1.35 (1.14 - 1.59)	0.000343825	16.84 (1.32 - 214.87)	0.0297722	1.35 (1.07 - 1.70)	0.0115768	3.00 (0.06 - 142.57)	0.577689	1.35 (1.06 - 1.72)	0.0165502	41.64 (0.81 - 2149.53)	0.0638614
rs11090039	1.35 (1.14 - 1.59)	0.000343825	0.81 (0.08 - 8.24)	0.862382	1.35 (1.07 - 1.70)	0.0115768	0.21 (0.01 - 6.82)	0.379776	1.35 (1.06 - 1.72)	0.0165502	2.74 (0.08 - 100.21)	0.582451
rs11119409	1.35 (1.14 - 1.59)	0.000343825	4.73 (0.43 - 52.40)	0.205191	1.35 (1.07 - 1.70)	0.0115768	1.21 (0.03 - 44.74)	0.918352	1.35 (1.06 - 1.72)	0.0165502	3.20 (0.08 - 122.10)	0.531134
rs11149313	1.35 (1.14 - 1.59)	0.000343825	0.10 (0.01 - 0.98)	0.0476922	1.35 (1.07 - 1.70)	0.0115768	0.55 (0.02 - 15.90)	0.728987	1.35 (1.06 - 1.72)	0.0165502	0.01 (0.00 - 0.48)	0.0182484
rs113851554	1.35 (1.14 - 1.59)	0.000343825	1.30 (0.54 - 3.09)	0.558251	1.35 (1.07 - 1.70)	0.0115768	1.67 (0.43 - 6.52)	0.457173	1.35 (1.06 - 1.72)	0.0165502	0.82 (0.23 - 2.94)	0.761792
rs1147852	1.35 (1.14 - 1.59)	0.000343825	0.14 (0.02 - 1.15)	0.0666838	1.35 (1.07 - 1.70)	0.0115768	0.04 (0.00 - 0.96)	0.0471752	1.35 (1.06 - 1.72)	0.0165502	0.20 (0.01 - 5.09)	0.326072
rs11588755	1.35 (1.14 - 1.59)	0.000343825	11.18 (0.97 - 128.30)	0.0525815	1.35 (1.07 - 1.70)	0.0115768	6.15 (0.15 - 253.75)	0.338835	1.35 (1.06 - 1.72)	0.0165502	9.02 (0.22 - 376.12)	0.247712
rs11605348	1.35 (1.14 - 1.59)	0.000343825	1.37 (0.20 - 9.50)	0.75042	1.35 (1.07 - 1.70)	0.0115768	9.53 (0.55 - 164.89)	0.120995	1.35 (1.06 - 1.72)	0.0165502	1.12 (0.06 - 21.49)	0.939676
rs116466468	1.35 (1.14 - 1.59)	0.000343825	2.65 (0.34 - 20.47)	0.348757	1.35 (1.07 - 1.70)	0.0115768	6.79 (0.31 - 147.10)	0.222325	1.35 (1.06 - 1.72)	0.0165502	0.38 (0.02 - 9.52)	0.557186
rs11650304	1.35 (1.14 - 1.59)	0.000343825	1.03 (0.11 - 9.99)	0.981989	1.35 (1.07 - 1.70)	0.0115768	0.22 (0.01 - 8.09)	0.406783	1.35 (1.06 - 1.72)	0.0165502	2.20 (0.07 - 64.72)	0.6474
rs1167132	1.35 (1.14 - 1.59)	0.000343825	2.84 (0.27 - 30.22)	0.386071	1.35 (1.07 - 1.70)	0.0115768	1.47 (0.04 - 52.96)	0.834151	1.35 (1.06 - 1.72)	0.0165502	25.11 (0.59 - 1064.56)	0.0917641
rs11679943	1.35 (1.14 - 1.59)	0.000343825	0.10 (0.01 - 0.88)	0.0382985	1.35 (1.07 - 1.70)	0.0115768	0.11 (0.00 - 3.08)	0.193337	1.35 (1.06 - 1.72)	0.0165502	0.31 (0.01 - 9.34)	0.502537
rs11722569	1.35 (1.14 - 1.59)	0.000343825	1.25 (0.10 - 15.26)	0.862919	1.35 (1.07 - 1.70)	0.0115768	0.93 (0.02 - 43.91)	0.968753	1.35 (1.06 - 1.72)	0.0165502	1.42 (0.03 - 65.92)	0.858465
rs11756035	1.35 (1.14 - 1.59)	0.000343825	0.32 (0.03 - 3.29)	0.334914	1.35 (1.07 - 1.70)	0.0115768	0.23 (0.01 - 7.62)	0.408654	1.35 (1.06 - 1.72)	0.0165502	0.42 (0.01 - 15.87)	0.639272
rs117630493	1.35 (1.14 - 1.59)	0.000343825	0.38 (0.03 - 5.24)	0.472613	1.35 (1.07 - 1.70)	0.0115768	0.07 (0.00 - 2.78)	0.1582	1.35 (1.06 - 1.72)	0.0165502	1.67 (0.03 - 109.61)	0.80932
rs11803128	1.35 (1.14 - 1.59)	0.000343825	3.85 (0.46 - 32.09)	0.213196	1.35 (1.07 - 1.70)	0.0115768	17.74 (0.63 - 503.54)	0.0920291	1.35 (1.06 - 1.72)	0.0165502	3.17 (0.12 - 82.14)	0.487644
rs118166957	1.35 (1.14 - 1.59)	0.000343825	5.19 (0.84 - 32.20)	0.0768073	1.35 (1.07 - 1.70)	0.0115768	0.82 (0.06 - 11.58)	0.885664	1.35 (1.06 - 1.72)	0.0165502	11.78 (0.65 - 212.55)	0.0947383
rs11838830	1.35 (1.14 - 1.59)	0.000343825	4.00 (0.44 - 36.38)	0.218401	1.35 (1.07 - 1.70)	0.0115768	0.45 (0.02 - 9.50)	0.606554	1.35 (1.06 - 1.72)	0.0165502	8.54 (0.26 - 277.30)	0.227225
rs12030482	1.35 (1.14 - 1.59)	0.000343825	2.61 (0.23 - 29.56)	0.437925	1.35 (1.07 - 1.70)	0.0115768	0.66 (0.02 - 24.58)	0.824365	1.35 (1.06 - 1.72)	0.0165502	24.46 (0.51 - 1172.21)	0.105352
rs12187443	1.35 (1.14 - 1.59)	0.000343825	0.25 (0.03 - 2.24)	0.216519	1.35 (1.07 - 1.70)	0.0115768	6.42 (0.27 - 150.52)	0.248283	1.35 (1.06 - 1.72)	0.0165502	0.14 (0.00 - 3.95)	0.245127
rs12251016	1.35 (1.14 - 1.59)	0.000343825	1.59 (0.18 - 13.91)	0.672757	1.35 (1.07 - 1.70)	0.0115768	8.41 (0.28 - 251.95)	0.219691	1.35 (1.06 - 1.72)	0.0165502	1.05 (0.04 - 28.58)	0.978396
rs12310246	1.35 (1.14 - 1.59)	0.000343825	0.61 (0.08 - 4.68)	0.634119	1.35 (1.07 - 1.70)	0.0115768	2.46 (0.11 - 56.74)	0.57383	1.35 (1.06 - 1.72)	0.0165502	0.85 (0.04 - 19.44)	0.917468
rs12520974	1.35 (1.14 - 1.59)	0.000343825	0.47 (0.05 - 4.82)	0.52708	1.35 (1.07 - 1.70)	0.0115768	1.38 (0.04 - 46.11)	0.857728	1.35 (1.06 - 1.72)	0.0165502	0.74 (0.02 - 25.64)	0.86824
rs12540241	1.35 (1.14 - 1.59)	0.000343825	0.06 (0.01 - 0.62)	0.0188808	1.35 (1.07 - 1.70)	0.0115768	0.03 (0.00 - 1.11)	0.057009	1.35 (1.06 - 1.72)	0.0165502	0.18 (0.00 - 6.72)	0.35335
rs12605642	1.35 (1.14 - 1.59)	0.000343825	4.49 (0.44 - 45.49)	0.203334	1.35 (1.07 - 1.70)	0.0115768	3.89 (0.11 - 137.04)	0.454999	1.35 (1.06 - 1.72)	0.0165502	9.00 (0.25 - 327.22)	0.230732
rs12614369	1.35 (1.14 - 1.59)	0.000343825	2.08 (0.14 - 31.06)	0.595926	1.35 (1.07 - 1.70)	0.0115768	7.33 (0.12 - 442.78)	0.341137	1.35 (1.06 - 1.72)	0.0165502	1.21 (0.02 - 76.87)	0.928236
rs12666306	1.35 (1.14 - 1.59)	0.000343825	1.29 (0.19 - 8.84)	0.795854	1.35 (1.07 - 1.70)	0.0115768	5.80 (0.33 - 102.05)	0.229547	1.35 (1.06 - 1.72)	0.0165502	0.92 (0.05 - 18.20)	0.958918
rs12790660	1.35 (1.14 - 1.59)	0.000343825	37.22 (3.54 - 391.31)	0.00258563	1.35 (1.07 - 1.70)	0.0115768	12.15 (0.35 - 416.50)	0.166147	1.35 (1.06 - 1.72)	0.0165502	54.09 (1.44 - 2028.79)	0.0309308
rs1289939	1.35 (1.14 - 1.59)	0.000343825	2.36 (0.25 - 22.39)	0.455449	1.35 (1.07 - 1.70)	0.0115768	1.56 (0.05 - 50.22)	0.802606	1.35 (1.06 - 1.72)	0.0165502	6.88 (0.23 - 202.73)	0.263847
rs12912299	1.35 (1.14 - 1.59)	0.000343825	10.58 (1.71 - 65.45)	0.0111617	1.35 (1.07 - 1.70)	0.0115768	3.13 (0.18 - 54.71)	0.434386	1.35 (1.06 - 1.72)	0.0165502	36.16 (2.35 - 556.19)	0.0100866
rs12917449	1.35 (1.14 - 1.59)	0.000343825	4.00 (0.35 - 45.71)	0.26501	1.35 (1.07 - 1.70)	0.0115768	9.69 (0.20 - 468.82)	0.251327	1.35 (1.06 - 1.72)	0.0165502	5.33 (0.13 - 226.88)	0.382066
rs12924275	1.35 (1.14 - 1.59)	0.000343825	0.42 (0.04 - 4.55)	0.478644	1.35 (1.07 - 1.70)	0.0115768	0.34 (0.01 - 12.48)	0.554188	1.35 (1.06 - 1.72)	0.0165502	0.18 (0.00 - 6.33)	0.341051
rs12983032	1.35 (1.14 - 1.59)	0.000343825	1.12 (0.16 - 7.95)	0.913078	1.35 (1.07 - 1.70)	0.0115768	0.80 (0.04 - 16.38)	0.883686	1.35 (1.06 - 1.72)	0.0165502	1.69 (0.09 - 32.74)	0.7279
rs13010288	1.35 (1.14 - 1.59)	0.000343825	4.47 (0.62 - 32.08)	0.136265	1.35 (1.07 - 1.70)	0.0115768	0.36 (0.02 - 8.33)	0.520214	1.35 (1.06 - 1.72)	0.0165502	12.45 (0.64 - 244.05)	0.0967173
rs13135092	1.35 (1.14 - 1.59)	0.000343825	3.21 (0.54 - 19.22)	0.201382	1.35 (1.07 - 1.70)	0.0115768	2.35 (0.17 - 31.94)	0.522389	1.35 (1.06 - 1.72)	0.0165502	1.13 (0.08 - 15.98)	0.929359
rs13138995	1.35 (1.14 - 1.59)	0.000343825	0.06 (0.01 - 0.62)	0.0179088	1.35 (1.07 - 1.70)	0.0115768	0.11 (0.00 - 3.83)	0.225473	1.35 (1.06 - 1.72)	0.0165502	0.01 (0.00 - 0.32)	0.0089872
rs1357685	1.35 (1.14 - 1.59)	0.000343825	2.32 (0.20 - 27.01)	0.501559	1.35 (1.07 - 1.70)	0.0115768	93.29 (1.77 - 4911.58)	0.0249006	1.35 (1.06 - 1.72)	0.0165502	0.07 (0.00 - 2.36)	0.1365
rs138014720	1.35 (1.14 - 1.59)	0.000343825	0.32 (0.03 - 3.63)	0.3576	1.35 (1.07 - 1.70)	0.0115768	0.11 (0.00 - 4.67)	0.244502	1.35 (1.06 - 1.72)	0.0165502	0.45 (0.01 - 16.84)	0.667173
rs138678612	1.35 (1.14 - 1.59)	0.000343825	0.55 (0.07 - 4.20)	0.563221	1.35 (1.07 - 1.70)	0.0115768	0.08 (0.01 - 1.24)	0.0707559	1.35 (1.06 - 1.72)	0.0165502	19.95 (0.53 - 746.92)	0.105373
rs1519102	1.35 (1.14 - 1.59)	0.000343825	2.38 (0.22 - 25.68)	0.473761	1.35 (1.07 - 1.70)	0.0115768	2.07 (0.05 - 79.24)	0.695806	1.35 (1.06 - 1.72)	0.0165502	82.47 (1.79 - 3803.55)	0.0239883
rs152555	1.35 (1.14 - 1.59)	0.000343825	0.81 (0.09 - 7.45)	0.854457	1.35 (1.07 - 1.70)	0.0115768	0.42 (0.01 - 12.33)	0.617659	1.35 (1.06 - 1.72)	0.0165502	7.64 (0.22 - 263.67)	0.260408
rs1530938	1.35 (1.14 - 1.59)	0.000343825	2.02 (0.21 - 19.28)	0.539992	1.35 (1.07 - 1.70)	0.0115768	1.33 (0.04 - 41.07)	0.871753	1.35 (1.06 - 1.72)	0.0165502	1.03 (0.03 - 31.52)	0.986561
rs1536053	1.35 (1.14 - 1.59)	0.000343825	3.65 (0.36 - 37.31)	0.274695	1.35 (1.07 - 1.70)	0.0115768	21.80 (0.68 - 694.09)	0.0809168	1.35 (1.06 - 1.72)	0.0165502	0.43 (0.01 - 16.91)	0.649002
rs1553754	1.35 (1.14 - 1.59)	0.000343825	3.46 (0.29 - 40.73)	0.323652	1.35 (1.07 - 1.70)	0.0115768	152.71 (2.77 - 8422.54)	0.0139795	1.35 (1.06 - 1.72)	0.0165502	0.80 (0.02 - 32.38)	0.904637
rs1567084	1.35 (1.14 - 1.59)	0.000343825	1.18 (0.11 - 13.19)	0.890902	1.35 (1.07 - 1.70)	0.0115768	1.23 (0.03 - 49.15)	0.911092	1.35 (1.06 - 1.72)	0.0165502	0.13 (0.00 - 4.87)	0.273193
rs1580173	1.35 (1.14 - 1.59)	0.000343825	0.37 (0.03 - 4.52)	0.438639	1.35 (1.07 - 1.70)	0.0115768	2.13 (0.05 - 89.60)	0.692416	1.35 (1.06 - 1.72)	0.0165502	0.59 (0.01 - 26.70)	0.784384
rs1620977	1.35 (1.14 - 1.59)	0.000343825	1.50 (0.26 - 8.58)	0.651735	1.35 (1.07 - 1.70)	0.0115768	0.86 (0.06 - 12.07)	0.913833	1.35 (1.06 - 1.72)	0.0165502	0.45 (0.03 - 6.09)	0.549747
rs16903122	1.35 (1.14 - 1.59)	0.000343825	0.20 (0.04 - 0.98)	0.0472231	1.35 (1.07 - 1.70)	0.0115768	0.29 (0.02 - 3.52)	0.334391	1.35 (1.06 - 1.72)	0.0165502	0.25 (0.02 - 3.02)	0.276812
rs16990210	1.35 (1.14 - 1.59)	0.000343825	1.66 (0.13 - 20.44)	0.693415	1.35 (1.07 - 1.70)	0.0115768	6.72 (0.13 - 348.07)	0.344431	1.35 (1.06 - 1.72)	0.0165502	0.21 (0.01 - 8.58)	0.410768
rs17005118	1.35 (1.14 - 1.59)	0.000343825	3.44 (0.37 - 32.24)	0.278689	1.35 (1.07 - 1.70)	0.0115768	3.43 (0.11 - 107.87)	0.48315	1.35 (1.06 - 1.72)	0.0165502	0.45 (0.02 - 12.35)	0.636997
rs17025198	1.35 (1.14 - 1.59)	0.000343825	0.99 (0.10 - 10.42)	0.996571	1.35 (1.07 - 1.70)	0.0115768	0.03 (0.00 - 0.84)	0.0395344	1.35 (1.06 - 1.72)	0.0165502	9.06 (0.22 - 373.46)	0.245265
rs17083297	1.35 (1.14 - 1.59)	0.000343825	0.25 (0.02 - 3.92)	0.325276	1.35 (1.07 - 1.70)	0.0115768	0.89 (0.02 - 48.39)	0.954415	1.35 (1.06 - 1.72)	0.0165502	0.26 (0.00 - 18.66)	0.534223
rs17223714	1.35 (1.14 - 1.59)	0.000343825	5.05 (0.64 - 39.88)	0.124394	1.35 (1.07 - 1.70)	0.0115768	144.17 (7.27 - 2860.12)	0.00110974	1.35 (1.06 - 1.72)	0.0165502	3.17 (0.13 - 76.28)	0.477603
rs17367725	1.35 (1.14 - 1.59)	0.000343825	2.95 (0.28 - 30.79)	0.366197	1.35 (1.07 - 1.70)	0.0115768	1.41 (0.04 - 52.85)	0.853965	1.35 (1.06 - 1.72)	0.0165502	4.33 (0.12 - 155.14)	0.421738
rs17520265	1.35 (1.14 - 1.59)	0.000343825	2.70 (0.21 - 34.83)	0.44646	1.35 (1.07 - 1.70)	0.0115768	21.34 (0.61 - 752.56)	0.0922421	1.35 (1.06 - 1.72)	0.0165502	2.35 (0.05 - 117.06)	0.668216
rs17643634	1.35 (1.14 - 1.59)	0.000343825	3.21 (0.45 - 23.13)	0.247245	1.35 (1.07 - 1.70)	0.0115768	1.29 (0.06 - 27.06)	0.867958	1.35 (1.06 - 1.72)	0.0165502	1.15 (0.05 - 25.51)	0.930993
rs176644	1.35 (1.14 - 1.59)	0.000343825	2.81 (0.27 - 29.35)	0.388212	1.35 (1.07 - 1.70)	0.0115768	0.43 (0.01 - 14.07)	0.635621	1.35 (1.06 - 1.72)	0.0165502	4.91 (0.13 - 185.60)	0.390472
rs1861412	1.35 (1.14 - 1.59)	0.000343825	1.70 (0.20 - 14.45)	0.626677	1.35 (1.07 - 1.70)	0.0115768	0.15 (0.01 - 3.49)	0.235283	1.35 (1.06 - 1.72)	0.0165502	16.98 (0.56 - 514.91)	0.103786
rs190073	1.35 (1.14 - 1.59)	0.000343825	7.07 (0.66 - 75.83)	0.105989	1.35 (1.07 - 1.70)	0.0115768	6.36 (0.17 - 244.54)	0.320529	1.35 (1.06 - 1.72)	0.0165502	1.28 (0.03 - 52.53)	0.897194
rs1927902	1.35 (1.14 - 1.59)	0.000343825	4.16 (0.68 - 25.49)	0.123489	1.35 (1.07 - 1.70)	0.0115768	1.24 (0.08 - 18.44)	0.87624	1.35 (1.06 - 1.72)	0.0165502	4.37 (0.27 - 71.11)	0.300016
rs1937447	1.35 (1.14 - 1.59)	0.000343825	6.93 (0.42 - 115.52)	0.177736	1.35 (1.07 - 1.70)	0.0115768	148.34 (1.52 - 14433.08)	0.0323066	1.35 (1.06 - 1.72)	0.0165502	1.96 (0.03 - 139.79)	0.757856
rs2089358	1.35 (1.14 - 1.59)	0.000343825	0.38 (0.04 - 3.25)	0.375778	1.35 (1.07 - 1.70)	0.0115768	0.67 (0.02 - 18.54)	0.810168	1.35 (1.06 - 1.72)	0.0165502	0.51 (0.02 - 14.02)	0.692078
rs214934	1.35 (1.14 - 1.59)	0.000343825	0.36 (0.03 - 3.75)	0.393268	1.35 (1.07 - 1.70)	0.0115768	0.03 (0.00 - 1.32)	0.0692615	1.35 (1.06 - 1.72)	0.0165502	0.47 (0.01 - 16.79)	0.677697
rs2216427	1.35 (1.14 - 1.59)	0.000343825	6.15 (0.60 - 62.55)	0.124944	1.35 (1.07 - 1.70)	0.0115768	0.99 (0.03 - 36.52)	0.997175	1.35 (1.06 - 1.72)	0.0165502	16.33 (0.48 - 557.62)	0.121067
rs224029	1.35 (1.14 - 1.59)	0.000343825	0.45 (0.05 - 3.82)	0.464353	1.35 (1.07 - 1.70)	0.0115768	0.30 (0.01 - 7.85)	0.466093	1.35 (1.06 - 1.72)	0.0165502	0.40 (0.01 - 10.48)	0.579852
rs2286729	1.35 (1.14 - 1.59)	0.000343825	0.20 (0.02 - 1.72)	0.141689	1.35 (1.07 - 1.70)	0.0115768	0.04 (0.00 - 0.90)	0.0428025	1.35 (1.06 - 1.72)	0.0165502	0.43 (0.01 - 12.45)	0.621527
rs2364921	1.35 (1.14 - 1.59)	0.000343825	0.60 (0.05 - 6.65)	0.679503	1.35 (1.07 - 1.70)	0.0115768	1.97 (0.05 - 74.03)	0.714708	1.35 (1.06 - 1.72)	0.0165502	1.05 (0.03 - 40.91)	0.978688
rs2388840	1.35 (1.14 - 1.59)	0.000343825	1.50 (0.16 - 14.36)	0.727149	1.35 (1.07 - 1.70)	0.0115768	1.80 (0.06 - 58.08)	0.740333	1.35 (1.06 - 1.72)	0.0165502	0.88 (0.03 - 27.63)	0.940115
rs2389631	1.35 (1.14 - 1.59)	0.000343825	5.44 (0.62 - 47.65)	0.125719	1.35 (1.07 - 1.70)	0.0115768	12.52 (0.42 - 371.82)	0.143987	1.35 (1.06 - 1.72)	0.0165502	0.98 (0.04 - 25.23)	0.99116
rs2398144	1.35 (1.14 - 1.59)	0.000343825	3.76 (0.43 - 32.65)	0.229034	1.35 (1.07 - 1.70)	0.0115768	0.46 (0.02 - 11.26)	0.635666	1.35 (1.06 - 1.72)	0.0165502	32.26 (1.04 - 1002.37)	0.0475518
rs2431108	1.35 (1.14 - 1.59)	0.000343825	0.40 (0.08 - 1.93)	0.252288	1.35 (1.07 - 1.70)	0.0115768	0.53 (0.05 - 6.01)	0.607249	1.35 (1.06 - 1.72)	0.0165502	2.13 (0.17 - 26.35)	0.555449
rs2447094	1.35 (1.14 - 1.59)	0.000343825	15.44 (1.57 - 152.20)	0.019083	1.35 (1.07 - 1.70)	0.0115768	3.19 (0.09 - 115.67)	0.527313	1.35 (1.06 - 1.72)	0.0165502	44.12 (1.40 - 1386.04)	0.0313207
rs2491124	1.35 (1.14 - 1.59)	0.000343825	2.29 (0.42 - 12.33)	0.335747	1.35 (1.07 - 1.70)	0.0115768	52.26 (4.66 - 585.57)	0.00133183	1.35 (1.06 - 1.72)	0.0165502	3.92 (0.30 - 50.67)	0.295889
rs2598293	1.35 (1.14 - 1.59)	0.000343825	0.57 (0.06 - 5.91)	0.640019	1.35 (1.07 - 1.70)	0.0115768	0.52 (0.01 - 18.71)	0.7234	1.35 (1.06 - 1.72)	0.0165502	20.03 (0.47 - 858.28)	0.118011
rs2737240	1.35 (1.14 - 1.59)	0.000343825	0.04 (0.00 - 0.52)	0.0143902	1.35 (1.07 - 1.70)	0.0115768	0.15 (0.00 - 7.57)	0.343401	1.35 (1.06 - 1.72)	0.0165502	0.06 (0.00 - 3.05)	0.158477
rs2792990	1.35 (1.14 - 1.59)	0.000343825	0.68 (0.08 - 5.70)	0.724782	1.35 (1.07 - 1.70)	0.0115768	0.08 (0.00 - 2.45)	0.14759	1.35 (1.06 - 1.72)	0.0165502	1.15 (0.05 - 28.07)	0.933161
rs2815757	1.35 (1.14 - 1.59)	0.000343825	0.27 (0.04 - 2.07)	0.209161	1.35 (1.07 - 1.70)	0.0115768	0.10 (0.00 - 2.40)	0.153714	1.35 (1.06 - 1.72)	0.0165502	0.24 (0.01 - 5.72)	0.381391
rs2838787	1.35 (1.14 - 1.59)	0.000343825	6.28 (0.67 - 59.19)	0.10848	1.35 (1.07 - 1.70)	0.0115768	1.23 (0.04 - 41.03)	0.908748	1.35 (1.06 - 1.72)	0.0165502	7.25 (0.24 - 220.33)	0.255387
rs28552587	1.35 (1.14 - 1.59)	0.000343825	1.27 (0.11 - 14.23)	0.848937	1.35 (1.07 - 1.70)	0.0115768	17.86 (0.51 - 624.98)	0.112042	1.35 (1.06 - 1.72)	0.0165502	0.28 (0.01 - 12.46)	0.509064
rs28582096	1.35 (1.14 - 1.59)	0.000343825	1.93 (0.28 - 13.34)	0.506509	1.35 (1.07 - 1.70)	0.0115768	0.57 (0.03 - 11.59)	0.711165	1.35 (1.06 - 1.72)	0.0165502	7.29 (0.41 - 130.51)	0.177085
rs28611339	1.35 (1.14 - 1.59)	0.000343825	1.15 (0.14 - 9.20)	0.891828	1.35 (1.07 - 1.70)	0.0115768	0.90 (0.04 - 20.89)	0.947444	1.35 (1.06 - 1.72)	0.0165502	2.24 (0.09 - 56.84)	0.624876
rs2867690	1.35 (1.14 - 1.59)	0.000343825	0.91 (0.08 - 10.32)	0.938634	1.35 (1.07 - 1.70)	0.0115768	3.79 (0.09 - 168.46)	0.49138	1.35 (1.06 - 1.72)	0.0165502	1.21 (0.03 - 50.76)	0.921911
rs2903385	1.35 (1.14 - 1.59)	0.000343825	5.12 (0.74 - 35.57)	0.0989254	1.35 (1.07 - 1.70)	0.0115768	1.74 (0.09 - 32.45)	0.709902	1.35 (1.06 - 1.72)	0.0165502	10.34 (0.51 - 211.19)	0.128993
rs3131638	1.35 (1.14 - 1.59)	0.000343825	0.35 (0.03 - 3.56)	0.374729	1.35 (1.07 - 1.70)	0.0115768	0.00 (0.00 - 0.24)	0.00725325	1.35 (1.06 - 1.72)	0.0165502	7.20 (0.24 - 212.10)	0.252928
rs314281	1.35 (1.14 - 1.59)	0.000343825	2.57 (0.41 - 16.21)	0.314693	1.35 (1.07 - 1.70)	0.0115768	6.75 (0.42 - 108.10)	0.176955	1.35 (1.06 - 1.72)	0.0165502	1.88 (0.11 - 32.37)	0.663312
rs3184470	1.35 (1.14 - 1.59)	0.000343825	1.32 (0.14 - 12.05)	0.804581	1.35 (1.07 - 1.70)	0.0115768	0.49 (0.02 - 15.68)	0.684524	1.35 (1.06 - 1.72)	0.0165502	3.73 (0.13 - 103.81)	0.438182
rs324017	1.35 (1.14 - 1.59)	0.000343825	7.26 (0.70 - 74.77)	0.0956975	1.35 (1.07 - 1.70)	0.0115768	23.17 (0.59 - 902.41)	0.0925518	1.35 (1.06 - 1.72)	0.0165502	53.10 (1.32 - 2139.31)	0.0351617
rs34036083	1.35 (1.14 - 1.59)	0.000343825	1.55 (0.14 - 17.47)	0.722878	1.35 (1.07 - 1.70)	0.0115768	2.47 (0.06 - 103.73)	0.635845	1.35 (1.06 - 1.72)	0.0165502	0.13 (0.00 - 4.76)	0.270612
rs34214423	1.35 (1.14 - 1.59)	0.000343825	1.75 (0.19 - 16.23)	0.62307	1.35 (1.07 - 1.70)	0.0115768	5.75 (0.21 - 155.35)	0.298076	1.35 (1.06 - 1.72)	0.0165502	0.49 (0.01 - 16.43)	0.691428
rs34490907	1.35 (1.14 - 1.59)	0.000343825	0.34 (0.02 - 4.55)	0.412077	1.35 (1.07 - 1.70)	0.0115768	0.23 (0.00 - 12.66)	0.474653	1.35 (1.06 - 1.72)	0.0165502	0.18 (0.00 - 10.08)	0.403843
rs34967082	1.35 (1.14 - 1.59)	0.000343825	0.44 (0.04 - 4.44)	0.484134	1.35 (1.07 - 1.70)	0.0115768	0.19 (0.01 - 6.39)	0.35341	1.35 (1.06 - 1.72)	0.0165502	2.25 (0.06 - 86.92)	0.663077
rs35110063	1.35 (1.14 - 1.59)	0.000343825	3.98 (0.48 - 33.28)	0.202826	1.35 (1.07 - 1.70)	0.0115768	0.35 (0.01 - 7.99)	0.50768	1.35 (1.06 - 1.72)	0.0165502	2.80 (0.11 - 72.14)	0.53428
rs35322724	1.35 (1.14 - 1.59)	0.000343825	2.35 (0.46 - 12.00)	0.306087	1.35 (1.07 - 1.70)	0.0115768	0.86 (0.07 - 11.11)	0.910245	1.35 (1.06 - 1.72)	0.0165502	3.70 (0.31 - 44.14)	0.30142
rs35539975	1.35 (1.14 - 1.59)	0.000343825	5.31 (0.58 - 48.89)	0.140426	1.35 (1.07 - 1.70)	0.0115768	5.22 (0.17 - 163.48)	0.347111	1.35 (1.06 - 1.72)	0.0165502	0.30 (0.01 - 10.40)	0.50198
rs37445	1.35 (1.14 - 1.59)	0.000343825	0.41 (0.04 - 4.30)	0.457475	1.35 (1.07 - 1.70)	0.0115768	0.65 (0.02 - 23.53)	0.813524	1.35 (1.06 - 1.72)	0.0165502	0.04 (0.00 - 1.83)	0.100434
rs3774751	1.35 (1.14 - 1.59)	0.000343825	1.77 (0.25 - 12.52)	0.56594	1.35 (1.07 - 1.70)	0.0115768	3.91 (0.20 - 75.58)	0.366759	1.35 (1.06 - 1.72)	0.0165502	2.07 (0.10 - 41.71)	0.633922
rs3902952	1.35 (1.14 - 1.59)	0.000343825	5.24 (0.58 - 47.24)	0.140121	1.35 (1.07 - 1.70)	0.0115768	0.75 (0.03 - 19.65)	0.864477	1.35 (1.06 - 1.72)	0.0165502	5.02 (0.18 - 142.17)	0.344502
rs4090240	1.35 (1.14 - 1.59)	0.000343825	0.08 (0.01 - 0.96)	0.045828	1.35 (1.07 - 1.70)	0.0115768	0.77 (0.02 - 27.98)	0.884473	1.35 (1.06 - 1.72)	0.0165502	0.03 (0.00 - 1.17)	0.0601443
rs4238755	1.35 (1.14 - 1.59)	0.000343825	0.29 (0.03 - 2.49)	0.257709	1.35 (1.07 - 1.70)	0.0115768	0.71 (0.03 - 18.80)	0.837572	1.35 (1.06 - 1.72)	0.0165502	0.79 (0.03 - 20.74)	0.88696
rs4260410	1.35 (1.14 - 1.59)	0.000343825	0.13 (0.01 - 1.47)	0.0996292	1.35 (1.07 - 1.70)	0.0115768	0.53 (0.01 - 23.83)	0.744801	1.35 (1.06 - 1.72)	0.0165502	0.01 (0.00 - 0.17)	0.00335262
rs429358	1.35 (1.14 - 1.59)	0.000343825	2.74 (0.20 - 37.91)	0.451576	1.35 (1.07 - 1.70)	0.0115768	1.66 (0.03 - 98.16)	0.807978	1.35 (1.06 - 1.72)	0.0165502	2.46 (0.04 - 136.01)	0.660618
rs4502882	1.35 (1.14 - 1.59)	0.000343825	0.66 (0.08 - 5.83)	0.711107	1.35 (1.07 - 1.70)	0.0115768	0.05 (0.00 - 1.32)	0.0732884	1.35 (1.06 - 1.72)	0.0165502	6.25 (0.20 - 197.00)	0.297778
rs45453598	1.35 (1.14 - 1.59)	0.000343825	0.09 (0.00 - 1.63)	0.102996	1.35 (1.07 - 1.70)	0.0115768	0.27 (0.00 - 24.53)	0.571378	1.35 (1.06 - 1.72)	0.0165502	0.00 (0.00 - 0.02)	0.000124879
rs4588900	1.35 (1.14 - 1.59)	0.000343825	0.26 (0.02 - 2.99)	0.277083	1.35 (1.07 - 1.70)	0.0115768	0.57 (0.01 - 23.41)	0.76924	1.35 (1.06 - 1.72)	0.0165502	0.73 (0.02 - 29.68)	0.865468
rs4592425	1.35 (1.14 - 1.59)	0.000343825	3.72 (0.42 - 33.08)	0.238046	1.35 (1.07 - 1.70)	0.0115768	3.48 (0.12 - 98.25)	0.464468	1.35 (1.06 - 1.72)	0.0165502	11.24 (0.41 - 304.94)	0.150787
rs4643373	1.35 (1.14 - 1.59)	0.000343825	0.77 (0.09 - 6.77)	0.810771	1.35 (1.07 - 1.70)	0.0115768	1.37 (0.05 - 37.20)	0.853179	1.35 (1.06 - 1.72)	0.0165502	0.54 (0.02 - 15.18)	0.718502
rs4664299	1.35 (1.14 - 1.59)	0.000343825	2.75 (0.28 - 27.40)	0.387771	1.35 (1.07 - 1.70)	0.0115768	2.31 (0.07 - 74.65)	0.635805	1.35 (1.06 - 1.72)	0.0165502	6.54 (0.20 - 211.48)	0.289884
rs4699157	1.35 (1.14 - 1.59)	0.000343825	3.68 (0.19 - 69.94)	0.385279	1.35 (1.07 - 1.70)	0.0115768	0.23 (0.00 - 12.38)	0.469129	1.35 (1.06 - 1.72)	0.0165502	5.13 (0.05 - 478.19)	0.480038
rs4702	1.35 (1.14 - 1.59)	0.000343825	1.72 (0.32 - 9.29)	0.529342	1.35 (1.07 - 1.70)	0.0115768	4.53 (0.33 - 62.86)	0.260412	1.35 (1.06 - 1.72)	0.0165502	5.47 (0.39 - 77.35)	0.208333
rs4709655	1.35 (1.14 - 1.59)	0.000343825	1.06 (0.11 - 10.33)	0.960793	1.35 (1.07 - 1.70)	0.0115768	1.15 (0.04 - 34.70)	0.936966	1.35 (1.06 - 1.72)	0.0165502	0.20 (0.01 - 7.77)	0.391805
rs4767645	1.35 (1.14 - 1.59)	0.000343825	0.74 (0.08 - 6.70)	0.785834	1.35 (1.07 - 1.70)	0.0115768	1.42 (0.05 - 39.83)	0.83815	1.35 (1.06 - 1.72)	0.0165502	1.24 (0.04 - 35.07)	0.901184
rs4788203	1.35 (1.14 - 1.59)	0.000343825	1.67 (0.16 - 17.95)	0.671479	1.35 (1.07 - 1.70)	0.0115768	1.89 (0.05 - 72.26)	0.73164	1.35 (1.06 - 1.72)	0.0165502	0.39 (0.01 - 16.16)	0.621907
rs4790076	1.35 (1.14 - 1.59)	0.000343825	0.71 (0.07 - 7.10)	0.766844	1.35 (1.07 - 1.70)	0.0115768	1.29 (0.04 - 45.30)	0.889942	1.35 (1.06 - 1.72)	0.0165502	0.81 (0.02 - 27.97)	0.907371
rs492858	1.35 (1.14 - 1.59)	0.000343825	1.65 (0.19 - 14.55)	0.654161	1.35 (1.07 - 1.70)	0.0115768	14.78 (0.66 - 330.12)	0.089269	1.35 (1.06 - 1.72)	0.0165502	0.05 (0.00 - 1.98)	0.112396
rs4981170	1.35 (1.14 - 1.59)	0.000343825	0.75 (0.11 - 4.94)	0.767308	1.35 (1.07 - 1.70)	0.0115768	1.23 (0.07 - 21.45)	0.888164	1.35 (1.06 - 1.72)	0.0165502	0.52 (0.03 - 9.42)	0.657192
rs521484	1.35 (1.14 - 1.59)	0.000343825	0.22 (0.02 - 2.31)	0.209014	1.35 (1.07 - 1.70)	0.0115768	0.44 (0.01 - 15.95)	0.65577	1.35 (1.06 - 1.72)	0.0165502	0.84 (0.02 - 31.82)	0.925345
rs524859	1.35 (1.14 - 1.59)	0.000343825	0.59 (0.08 - 4.17)	0.601104	1.35 (1.07 - 1.70)	0.0115768	0.11 (0.01 - 2.33)	0.156489	1.35 (1.06 - 1.72)	0.0165502	2.01 (0.11 - 37.31)	0.639702
rs55772859	1.35 (1.14 - 1.59)	0.000343825	0.73 (0.10 - 5.49)	0.755901	1.35 (1.07 - 1.70)	0.0115768	0.31 (0.01 - 6.61)	0.455668	1.35 (1.06 - 1.72)	0.0165502	1.23 (0.05 - 27.52)	0.898132
rs55972276	1.35 (1.14 - 1.59)	0.000343825	2.67 (0.44 - 16.33)	0.289066	1.35 (1.07 - 1.70)	0.0115768	1.11 (0.08 - 16.43)	0.93777	1.35 (1.06 - 1.72)	0.0165502	3.21 (0.20 - 52.37)	0.412816
rs56097173	1.35 (1.14 - 1.59)	0.000343825	2.53 (0.30 - 21.30)	0.392153	1.35 (1.07 - 1.70)	0.0115768	1.73 (0.06 - 46.18)	0.744583	1.35 (1.06 - 1.72)	0.0165502	17.29 (0.74 - 405.25)	0.076618
rs56133505	1.35 (1.14 - 1.59)	0.000343825	0.25 (0.03 - 1.88)	0.178572	1.35 (1.07 - 1.70)	0.0115768	0.10 (0.00 - 2.26)	0.147586	1.35 (1.06 - 1.72)	0.0165502	0.26 (0.01 - 5.65)	0.392879
rs566673	1.35 (1.14 - 1.59)	0.000343825	2.47 (0.27 - 22.61)	0.422114	1.35 (1.07 - 1.70)	0.0115768	39.90 (1.14 - 1400.16)	0.0422803	1.35 (1.06 - 1.72)	0.0165502	1.52 (0.05 - 45.09)	0.807238
rs5877	1.35 (1.14 - 1.59)	0.000343825	1.81 (0.18 - 18.51)	0.617315	1.35 (1.07 - 1.70)	0.0115768	0.50 (0.01 - 18.50)	0.708888	1.35 (1.06 - 1.72)	0.0165502	1.26 (0.04 - 44.72)	0.898721
rs6019663	1.35 (1.14 - 1.59)	0.000343825	1.89 (0.20 - 17.51)	0.573412	1.35 (1.07 - 1.70)	0.0115768	0.32 (0.01 - 8.78)	0.503655	1.35 (1.06 - 1.72)	0.0165502	3.16 (0.10 - 97.43)	0.510576
rs60565673	1.35 (1.14 - 1.59)	0.000343825	0.47 (0.07 - 3.17)	0.437266	1.35 (1.07 - 1.70)	0.0115768	0.45 (0.02 - 8.54)	0.596853	1.35 (1.06 - 1.72)	0.0165502	1.24 (0.06 - 24.74)	0.886639
rs6119267	1.35 (1.14 - 1.59)	0.000343825	1.41 (0.32 - 6.14)	0.645247	1.35 (1.07 - 1.70)	0.0115768	0.72 (0.08 - 6.85)	0.773405	1.35 (1.06 - 1.72)	0.0165502	1.34 (0.14 - 12.79)	0.796981
rs61765555	1.35 (1.14 - 1.59)	0.000343825	2.90 (0.33 - 25.38)	0.335799	1.35 (1.07 - 1.70)	0.0115768	4.59 (0.17 - 120.72)	0.361109	1.35 (1.06 - 1.72)	0.0165502	1.78 (0.06 - 51.78)	0.737335
rs61921611	1.35 (1.14 - 1.59)	0.000343825	1.70 (0.23 - 12.45)	0.599465	1.35 (1.07 - 1.70)	0.0115768	0.77 (0.04 - 15.11)	0.863035	1.35 (1.06 - 1.72)	0.0165502	4.63 (0.21 - 103.68)	0.333812
rs62068188	1.35 (1.14 - 1.59)	0.000343825	0.52 (0.05 - 5.71)	0.594581	1.35 (1.07 - 1.70)	0.0115768	0.80 (0.02 - 29.72)	0.902069	1.35 (1.06 - 1.72)	0.0165502	0.34 (0.01 - 13.62)	0.563055
rs62149809	1.35 (1.14 - 1.59)	0.000343825	0.24 (0.01 - 10.49)	0.459563	1.35 (1.07 - 1.70)	0.0115768	0.01 (0.00 - 4.78)	0.131378	1.35 (1.06 - 1.72)	0.0165502	0.38 (0.00 - 95.06)	0.733859
rs62158170	1.35 (1.14 - 1.59)	0.000343825	0.90 (0.20 - 4.03)	0.885549	1.35 (1.07 - 1.70)	0.0115768	1.31 (0.13 - 12.73)	0.815653	1.35 (1.06 - 1.72)	0.0165502	0.42 (0.04 - 4.40)	0.466772
rs62194948	1.35 (1.14 - 1.59)	0.000343825	0.33 (0.03 - 3.60)	0.36147	1.35 (1.07 - 1.70)	0.0115768	0.76 (0.02 - 32.43)	0.887259	1.35 (1.06 - 1.72)	0.0165502	0.03 (0.00 - 1.20)	0.0632157
rs62213452	1.35 (1.14 - 1.59)	0.000343825	0.87 (0.07 - 10.48)	0.912415	1.35 (1.07 - 1.70)	0.0115768	0.82 (0.02 - 37.53)	0.92008	1.35 (1.06 - 1.72)	0.0165502	1.99 (0.04 - 94.19)	0.725884
rs62264767	1.35 (1.14 - 1.59)	0.000343825	9.09 (1.76 - 46.99)	0.00847164	1.35 (1.07 - 1.70)	0.0115768	83.83 (7.52 - 934.98)	0.000319206	1.35 (1.06 - 1.72)	0.0165502	1.18 (0.09 - 16.12)	0.903124
rs62301574	1.35 (1.14 - 1.59)	0.000343825	0.80 (0.08 - 8.24)	0.853813	1.35 (1.07 - 1.70)	0.0115768	0.85 (0.02 - 29.30)	0.930194	1.35 (1.06 - 1.72)	0.0165502	3.22 (0.09 - 121.33)	0.527494
rs623025	1.35 (1.14 - 1.59)	0.000343825	2.46 (0.22 - 27.15)	0.462248	1.35 (1.07 - 1.70)	0.0115768	1.23 (0.03 - 49.98)	0.912182	1.35 (1.06 - 1.72)	0.0165502	1.31 (0.03 - 53.86)	0.886988
rs62383308	1.35 (1.14 - 1.59)	0.000343825	0.70 (0.05 - 10.36)	0.797087	1.35 (1.07 - 1.70)	0.0115768	8.96 (0.18 - 439.78)	0.2697	1.35 (1.06 - 1.72)	0.0165502	1.52 (0.03 - 83.85)	0.836723
rs62429521	1.35 (1.14 - 1.59)	0.000343825	0.42 (0.05 - 3.52)	0.4226	1.35 (1.07 - 1.70)	0.0115768	0.57 (0.02 - 15.68)	0.7381	1.35 (1.06 - 1.72)	0.0165502	0.13 (0.01 - 2.93)	0.197447
rs6457796	1.35 (1.14 - 1.59)	0.000343825	2.22 (0.21 - 23.75)	0.509739	1.35 (1.07 - 1.70)	0.0115768	0.77 (0.02 - 26.74)	0.886917	1.35 (1.06 - 1.72)	0.0165502	4.83 (0.12 - 191.08)	0.401363
rs6465151	1.35 (1.14 - 1.59)	0.000343825	1.63 (0.19 - 14.14)	0.655708	1.35 (1.07 - 1.70)	0.0115768	2.54 (0.09 - 71.18)	0.583488	1.35 (1.06 - 1.72)	0.0165502	1.68 (0.06 - 45.29)	0.758013
rs647905	1.35 (1.14 - 1.59)	0.000343825	1.35 (0.12 - 15.30)	0.809907	1.35 (1.07 - 1.70)	0.0115768	0.70 (0.02 - 29.51)	0.849503	1.35 (1.06 - 1.72)	0.0165502	9.79 (0.26 - 365.16)	0.216713
rs6510033	1.35 (1.14 - 1.59)	0.000343825	4.02 (0.30 - 53.02)	0.290811	1.35 (1.07 - 1.70)	0.0115768	0.71 (0.02 - 32.99)	0.860614	1.35 (1.06 - 1.72)	0.0165502	100.16 (1.58 - 6333.39)	0.0294546
rs6562066	1.35 (1.14 - 1.59)	0.000343825	1.90 (0.23 - 15.57)	0.549472	1.35 (1.07 - 1.70)	0.0115768	9.64 (0.36 - 259.78)	0.177499	1.35 (1.06 - 1.72)	0.0165502	0.12 (0.01 - 2.69)	0.183214
rs6589988	1.35 (1.14 - 1.59)	0.000343825	5.74 (0.55 - 59.43)	0.142869	1.35 (1.07 - 1.70)	0.0115768	0.43 (0.01 - 13.03)	0.62609	1.35 (1.06 - 1.72)	0.0165502	13.92 (0.37 - 525.27)	0.155048
rs6597649	1.35 (1.14 - 1.59)	0.000343825	0.92 (0.08 - 10.78)	0.947065	1.35 (1.07 - 1.70)	0.0115768	0.11 (0.00 - 4.38)	0.242637	1.35 (1.06 - 1.72)	0.0165502	0.08 (0.00 - 3.17)	0.181174
rs6601080	1.35 (1.14 - 1.59)	0.000343825	0.16 (0.01 - 1.90)	0.144555	1.35 (1.07 - 1.70)	0.0115768	0.02 (0.00 - 1.30)	0.0674382	1.35 (1.06 - 1.72)	0.0165502	0.12 (0.00 - 5.60)	0.277503
rs6606731	1.35 (1.14 - 1.59)	0.000343825	0.47 (0.04 - 5.11)	0.534794	1.35 (1.07 - 1.70)	0.0115768	0.91 (0.02 - 35.93)	0.958212	1.35 (1.06 - 1.72)	0.0165502	0.60 (0.01 - 24.09)	0.786067
rs66674044	1.35 (1.14 - 1.59)	0.000343825	1.32 (0.18 - 9.56)	0.780249	1.35 (1.07 - 1.70)	0.0115768	0.60 (0.03 - 12.01)	0.734896	1.35 (1.06 - 1.72)	0.0165502	0.11 (0.01 - 1.78)	0.118908
rs667730	1.35 (1.14 - 1.59)	0.000343825	1.84 (0.17 - 20.44)	0.619302	1.35 (1.07 - 1.70)	0.0115768	3.91 (0.10 - 149.58)	0.463556	1.35 (1.06 - 1.72)	0.0165502	0.28 (0.01 - 12.39)	0.510486
rs6702604	1.35 (1.14 - 1.59)	0.000343825	1.13 (0.12 - 10.55)	0.912073	1.35 (1.07 - 1.70)	0.0115768	0.64 (0.02 - 19.07)	0.799036	1.35 (1.06 - 1.72)	0.0165502	0.39 (0.01 - 11.43)	0.587071
rs670501	1.35 (1.14 - 1.59)	0.000343825	1.76 (0.28 - 11.08)	0.547498	1.35 (1.07 - 1.70)	0.0115768	38.92 (1.90 - 798.48)	0.0175348	1.35 (1.06 - 1.72)	0.0165502	0.47 (0.03 - 7.15)	0.587095
rs671985	1.35 (1.14 - 1.59)	0.000343825	2.18 (0.26 - 17.92)	0.469777	1.35 (1.07 - 1.70)	0.0115768	1.30 (0.05 - 33.87)	0.874778	1.35 (1.06 - 1.72)	0.0165502	39.07 (1.79 - 850.91)	0.019703
rs6734957	1.35 (1.14 - 1.59)	0.000343825	1.98 (0.19 - 20.50)	0.56849	1.35 (1.07 - 1.70)	0.0115768	3.19 (0.09 - 115.04)	0.525282	1.35 (1.06 - 1.72)	0.0165502	2.07 (0.06 - 73.59)	0.689697
rs67501351	1.35 (1.14 - 1.59)	0.000343825	0.36 (0.05 - 2.90)	0.339969	1.35 (1.07 - 1.70)	0.0115768	1.05 (0.05 - 24.13)	0.97705	1.35 (1.06 - 1.72)	0.0165502	0.39 (0.02 - 9.36)	0.558411
rs6756610	1.35 (1.14 - 1.59)	0.000343825	1.34 (0.14 - 12.63)	0.798789	1.35 (1.07 - 1.70)	0.0115768	0.21 (0.01 - 7.34)	0.392066	1.35 (1.06 - 1.72)	0.0165502	9.27 (0.34 - 255.63)	0.188072
rs6808140	1.35 (1.14 - 1.59)	0.000343825	3.49 (0.41 - 29.67)	0.251796	1.35 (1.07 - 1.70)	0.0115768	4.74 (0.18 - 127.40)	0.354323	1.35 (1.06 - 1.72)	0.0165502	0.86 (0.03 - 21.27)	0.924775
rs6888135	1.35 (1.14 - 1.59)	0.000343825	0.33 (0.04 - 2.53)	0.283604	1.35 (1.07 - 1.70)	0.0115768	0.73 (0.03 - 17.42)	0.846937	1.35 (1.06 - 1.72)	0.0165502	0.05 (0.00 - 1.03)	0.0522175
rs694786	1.35 (1.14 - 1.59)	0.000343825	2.58 (0.43 - 15.65)	0.302633	1.35 (1.07 - 1.70)	0.0115768	4.09 (0.26 - 63.27)	0.313035	1.35 (1.06 - 1.72)	0.0165502	3.28 (0.21 - 52.17)	0.399332
rs6967168	1.35 (1.14 - 1.59)	0.000343825	0.27 (0.03 - 2.22)	0.221653	1.35 (1.07 - 1.70)	0.0115768	0.45 (0.02 - 11.91)	0.629632	1.35 (1.06 - 1.72)	0.0165502	0.24 (0.01 - 6.18)	0.392643
rs6973090	1.35 (1.14 - 1.59)	0.000343825	0.10 (0.00 - 2.35)	0.155225	1.35 (1.07 - 1.70)	0.0115768	0.03 (0.00 - 3.73)	0.151482	1.35 (1.06 - 1.72)	0.0165502	0.38 (0.00 - 42.22)	0.690079
rs6978112	1.35 (1.14 - 1.59)	0.000343825	2.02 (0.18 - 23.08)	0.57094	1.35 (1.07 - 1.70)	0.0115768	0.49 (0.01 - 19.41)	0.70655	1.35 (1.06 - 1.72)	0.0165502	0.57 (0.01 - 22.54)	0.761858
rs699844	1.35 (1.14 - 1.59)	0.000343825	5.65 (0.44 - 73.11)	0.185056	1.35 (1.07 - 1.70)	0.0115768	9.66 (0.21 - 439.06)	0.244301	1.35 (1.06 - 1.72)	0.0165502	18.24 (0.41 - 808.29)	0.133391
rs701394	1.35 (1.14 - 1.59)	0.000343825	0.42 (0.04 - 4.36)	0.464204	1.35 (1.07 - 1.70)	0.0115768	0.88 (0.02 - 33.13)	0.942933	1.35 (1.06 - 1.72)	0.0165502	0.28 (0.01 - 9.75)	0.479095
rs7040224	1.35 (1.14 - 1.59)	0.000343825	17.40 (1.56 - 194.04)	0.0202638	1.35 (1.07 - 1.70)	0.0115768	10.98 (0.29 - 421.23)	0.197876	1.35 (1.06 - 1.72)	0.0165502	204.88 (4.45 - 9426.90)	0.00643973
rs715338	1.35 (1.14 - 1.59)	0.000343825	0.77 (0.11 - 5.54)	0.792279	1.35 (1.07 - 1.70)	0.0115768	0.46 (0.02 - 9.75)	0.619003	1.35 (1.06 - 1.72)	0.0165502	4.86 (0.26 - 92.44)	0.292942
rs71575448	1.35 (1.14 - 1.59)	0.000343825	3.80 (0.32 - 44.82)	0.288457	1.35 (1.07 - 1.70)	0.0115768	0.96 (0.02 - 45.97)	0.985556	1.35 (1.06 - 1.72)	0.0165502	1.82 (0.04 - 85.63)	0.761353
rs7168238	1.35 (1.14 - 1.59)	0.000343825	1.18 (0.12 - 11.39)	0.885356	1.35 (1.07 - 1.70)	0.0115768	0.21 (0.01 - 5.37)	0.341771	1.35 (1.06 - 1.72)	0.0165502	9.84 (0.27 - 362.66)	0.21422
rs7214267	1.35 (1.14 - 1.59)	0.000343825	11.58 (1.64 - 81.97)	0.0141377	1.35 (1.07 - 1.70)	0.0115768	6.25 (0.33 - 118.51)	0.222121	1.35 (1.06 - 1.72)	0.0165502	4.28 (0.22 - 82.53)	0.335824
rs72657797	1.35 (1.14 - 1.59)	0.000343825	2.29 (0.25 - 21.11)	0.464987	1.35 (1.07 - 1.70)	0.0115768	1.22 (0.04 - 37.67)	0.911241	1.35 (1.06 - 1.72)	0.0165502	1.08 (0.03 - 34.42)	0.96698
rs72773790	1.35 (1.14 - 1.59)	0.000343825	0.70 (0.06 - 7.64)	0.766318	1.35 (1.07 - 1.70)	0.0115768	1.21 (0.03 - 46.14)	0.9201	1.35 (1.06 - 1.72)	0.0165502	2.31 (0.06 - 84.09)	0.648373
rs728017	1.35 (1.14 - 1.59)	0.000343825	4.93 (0.49 - 49.93)	0.177207	1.35 (1.07 - 1.70)	0.0115768	8.43 (0.25 - 287.00)	0.236249	1.35 (1.06 - 1.72)	0.0165502	5.50 (0.16 - 190.47)	0.345854
rs72820274	1.35 (1.14 - 1.59)	0.000343825	44.61 (3.68 - 540.41)	0.00284049	1.35 (1.07 - 1.70)	0.0115768	309.63 (6.03 - 15907.93)	0.00432109	1.35 (1.06 - 1.72)	0.0165502	39.69 (0.87 - 1821.31)	0.059326
rs72899452	1.35 (1.14 - 1.59)	0.000343825	3.47 (0.38 - 31.56)	0.270017	1.35 (1.07 - 1.70)	0.0115768	10.48 (0.33 - 329.86)	0.181904	1.35 (1.06 - 1.72)	0.0165502	0.65 (0.03 - 15.45)	0.7915
rs73079014	1.35 (1.14 - 1.59)	0.000343825	168.81 (15.00 - 1899.47)	3.28285e-05	1.35 (1.07 - 1.70)	0.0115768	97.43 (2.18 - 4345.64)	0.0181152	1.35 (1.06 - 1.72)	0.0165502	46.27 (1.11 - 1934.67)	0.0440847
rs73163783	1.35 (1.14 - 1.59)	0.000343825	4.06 (0.34 - 47.98)	0.266539	1.35 (1.07 - 1.70)	0.0115768	2.64 (0.06 - 112.14)	0.611458	1.35 (1.06 - 1.72)	0.0165502	0.43 (0.01 - 16.42)	0.651895
rs73671843	1.35 (1.14 - 1.59)	0.000343825	0.26 (0.03 - 2.46)	0.239508	1.35 (1.07 - 1.70)	0.0115768	0.08 (0.00 - 2.73)	0.163781	1.35 (1.06 - 1.72)	0.0165502	1.64 (0.06 - 45.92)	0.771846
rs7402939	1.35 (1.14 - 1.59)	0.000343825	10.58 (1.14 - 98.58)	0.0382832	1.35 (1.07 - 1.70)	0.0115768	3.63 (0.11 - 116.06)	0.465985	1.35 (1.06 - 1.72)	0.0165502	14.26 (0.48 - 427.28)	0.125622
rs742760	1.35 (1.14 - 1.59)	0.000343825	1.11 (0.10 - 12.10)	0.933099	1.35 (1.07 - 1.70)	0.0115768	3.39 (0.09 - 121.96)	0.503675	1.35 (1.06 - 1.72)	0.0165502	0.94 (0.02 - 36.71)	0.973171
rs7432782	1.35 (1.14 - 1.59)	0.000343825	2.83 (0.19 - 41.11)	0.446117	1.35 (1.07 - 1.70)	0.0115768	0.61 (0.01 - 27.87)	0.799379	1.35 (1.06 - 1.72)	0.0165502	0.24 (0.01 - 11.01)	0.466548
rs7475916	1.35 (1.14 - 1.59)	0.000343825	1.35 (0.13 - 13.93)	0.803478	1.35 (1.07 - 1.70)	0.0115768	3.22 (0.09 - 109.66)	0.51554	1.35 (1.06 - 1.72)	0.0165502	0.89 (0.02 - 31.78)	0.949283
rs7486418	1.35 (1.14 - 1.59)	0.000343825	1.75 (0.23 - 13.37)	0.591729	1.35 (1.07 - 1.70)	0.0115768	6.48 (0.30 - 141.52)	0.234714	1.35 (1.06 - 1.72)	0.0165502	0.36 (0.01 - 8.76)	0.530179
rs75452188	1.35 (1.14 - 1.59)	0.000343825	1.42 (0.14 - 14.35)	0.764532	1.35 (1.07 - 1.70)	0.0115768	6.76 (0.23 - 201.76)	0.269777	1.35 (1.06 - 1.72)	0.0165502	1.28 (0.04 - 43.86)	0.892272
rs7566062	1.35 (1.14 - 1.59)	0.000343825	1.82 (0.35 - 9.45)	0.47487	1.35 (1.07 - 1.70)	0.0115768	1.16 (0.10 - 13.98)	0.908197	1.35 (1.06 - 1.72)	0.0165502	4.41 (0.33 - 58.69)	0.260878
rs7571486	1.35 (1.14 - 1.59)	0.000343825	0.21 (0.02 - 2.28)	0.200512	1.35 (1.07 - 1.70)	0.0115768	1.14 (0.03 - 38.87)	0.94254	1.35 (1.06 - 1.72)	0.0165502	0.05 (0.00 - 1.90)	0.104819
rs75932578	1.35 (1.14 - 1.59)	0.000343825	0.43 (0.04 - 5.09)	0.499767	1.35 (1.07 - 1.70)	0.0115768	0.61 (0.01 - 25.74)	0.794599	1.35 (1.06 - 1.72)	0.0165502	0.67 (0.01 - 29.94)	0.835526
rs7599697	1.35 (1.14 - 1.59)	0.000343825	0.76 (0.07 - 7.90)	0.819932	1.35 (1.07 - 1.70)	0.0115768	0.67 (0.02 - 24.39)	0.824375	1.35 (1.06 - 1.72)	0.0165502	0.14 (0.00 - 5.66)	0.298066
rs76145129	1.35 (1.14 - 1.59)	0.000343825	156.59 (16.51 - 1484.99)	1.06712e-05	1.35 (1.07 - 1.70)	0.0115768	128.97 (4.29 - 3876.00)	0.0051263	1.35 (1.06 - 1.72)	0.0165502	529.33 (18.86 - 14859.25)	0.000227708
rs7615602	1.35 (1.14 - 1.59)	0.000343825	4.85 (0.56 - 42.03)	0.151902	1.35 (1.07 - 1.70)	0.0115768	11.75 (0.46 - 298.43)	0.135537	1.35 (1.06 - 1.72)	0.0165502	17.63 (0.70 - 443.70)	0.081235
rs7625896	1.35 (1.14 - 1.59)	0.000343825	2.42 (0.24 - 24.52)	0.454418	1.35 (1.07 - 1.70)	0.0115768	1.36 (0.04 - 49.32)	0.86716	1.35 (1.06 - 1.72)	0.0165502	1.88 (0.05 - 66.07)	0.728115
rs78206187	1.35 (1.14 - 1.59)	0.000343825	0.89 (0.12 - 6.80)	0.912167	1.35 (1.07 - 1.70)	0.0115768	0.55 (0.03 - 11.29)	0.69946	1.35 (1.06 - 1.72)	0.0165502	0.21 (0.01 - 3.97)	0.296636
rs79204944	1.35 (1.14 - 1.59)	0.000343825	22.44 (1.55 - 325.49)	0.0226247	1.35 (1.07 - 1.70)	0.0115768	30.54 (0.54 - 1742.84)	0.097508	1.35 (1.06 - 1.72)	0.0165502	25.07 (0.40 - 1557.59)	0.126197
rs79693059	1.35 (1.14 - 1.59)	0.000343825	0.37 (0.05 - 2.83)	0.336617	1.35 (1.07 - 1.70)	0.0115768	0.91 (0.04 - 20.27)	0.950616	1.35 (1.06 - 1.72)	0.0165502	1.11 (0.04 - 28.27)	0.948136
rs7992992	1.35 (1.14 - 1.59)	0.000343825	26.54 (2.11 - 334.01)	0.0111584	1.35 (1.07 - 1.70)	0.0115768	83.40 (1.62 - 4302.58)	0.0278933	1.35 (1.06 - 1.72)	0.0165502	230.20 (4.02 - 13183.58)	0.00844843
rs8076183	1.35 (1.14 - 1.59)	0.000343825	1.39 (0.16 - 11.95)	0.762782	1.35 (1.07 - 1.70)	0.0115768	13.33 (0.56 - 317.50)	0.109347	1.35 (1.06 - 1.72)	0.0165502	0.31 (0.01 - 8.90)	0.492827
rs8180457	1.35 (1.14 - 1.59)	0.000343825	0.46 (0.06 - 3.43)	0.445223	1.35 (1.07 - 1.70)	0.0115768	3.82 (0.19 - 75.64)	0.378348	1.35 (1.06 - 1.72)	0.0165502	0.09 (0.00 - 2.15)	0.135942
rs8181889	1.35 (1.14 - 1.59)	0.000343825	0.22 (0.02 - 2.27)	0.204456	1.35 (1.07 - 1.70)	0.0115768	2.08 (0.07 - 65.22)	0.677948	1.35 (1.06 - 1.72)	0.0165502	0.03 (0.00 - 1.37)	0.0726176
rs823247	1.35 (1.14 - 1.59)	0.000343825	5.52 (0.62 - 48.94)	0.125091	1.35 (1.07 - 1.70)	0.0115768	11.00 (0.40 - 304.26)	0.157016	1.35 (1.06 - 1.72)	0.0165502	4.28 (0.15 - 126.29)	0.39984
rs830716	1.35 (1.14 - 1.59)	0.000343825	0.27 (0.03 - 2.09)	0.209861	1.35 (1.07 - 1.70)	0.0115768	0.25 (0.01 - 5.69)	0.381097	1.35 (1.06 - 1.72)	0.0165502	0.07 (0.00 - 1.77)	0.107279
rs871994	1.35 (1.14 - 1.59)	0.000343825	0.95 (0.10 - 9.38)	0.965926	1.35 (1.07 - 1.70)	0.0115768	0.05 (0.00 - 1.45)	0.0814925	1.35 (1.06 - 1.72)	0.0165502	0.74 (0.02 - 24.94)	0.869347
rs874168	1.35 (1.14 - 1.59)	0.000343825	7.66 (0.79 - 73.94)	0.078259	1.35 (1.07 - 1.70)	0.0115768	1.03 (0.03 - 37.17)	0.985475	1.35 (1.06 - 1.72)	0.0165502	12.25 (0.39 - 386.96)	0.154934
rs908668	1.35 (1.14 - 1.59)	0.000343825	0.20 (0.03 - 1.36)	0.0989127	1.35 (1.07 - 1.70)	0.0115768	0.38 (0.02 - 7.66)	0.530985	1.35 (1.06 - 1.72)	0.0165502	0.06 (0.00 - 1.12)	0.0594394
rs910187	1.35 (1.14 - 1.59)	0.000343825	1.05 (0.09 - 12.08)	0.97106	1.35 (1.07 - 1.70)	0.0115768	1.22 (0.03 - 51.74)	0.918851	1.35 (1.06 - 1.72)	0.0165502	2.06 (0.05 - 83.12)	0.701638
rs9316619	1.35 (1.14 - 1.59)	0.000343825	0.34 (0.03 - 3.58)	0.367832	1.35 (1.07 - 1.70)	0.0115768	0.10 (0.00 - 3.96)	0.220655	1.35 (1.06 - 1.72)	0.0165502	0.71 (0.02 - 25.08)	0.84905
rs9394502	1.35 (1.14 - 1.59)	0.000343825	0.62 (0.13 - 3.00)	0.553254	1.35 (1.07 - 1.70)	0.0115768	0.18 (0.02 - 2.12)	0.172265	1.35 (1.06 - 1.72)	0.0165502	1.10 (0.10 - 11.88)	0.93744
rs940780	1.35 (1.14 - 1.59)	0.000343825	0.71 (0.08 - 6.50)	0.760405	1.35 (1.07 - 1.70)	0.0115768	2.46 (0.08 - 77.38)	0.608932	1.35 (1.06 - 1.72)	0.0165502	5.90 (0.17 - 201.15)	0.323933
rs9469434	1.35 (1.14 - 1.59)	0.000343825	0.13 (0.01 - 1.67)	0.116709	1.35 (1.07 - 1.70)	0.0115768	0.40 (0.01 - 20.07)	0.646285	1.35 (1.06 - 1.72)	0.0165502	0.20 (0.00 - 9.99)	0.417804
rs9527083	1.35 (1.14 - 1.59)	0.000343825	0.79 (0.26 - 2.41)	0.68424	1.35 (1.07 - 1.70)	0.0115768	1.30 (0.23 - 7.34)	0.768284	1.35 (1.06 - 1.72)	0.0165502	0.29 (0.06 - 1.50)	0.138846
rs9563886	1.35 (1.14 - 1.59)	0.000343825	4.04 (0.33 - 48.91)	0.272286	1.35 (1.07 - 1.70)	0.0115768	26.85 (0.54 - 1340.47)	0.0991347	1.35 (1.06 - 1.72)	0.0165502	5.24 (0.11 - 243.03)	0.397553
rs9889282	1.35 (1.14 - 1.59)	0.000343825	3.35 (0.45 - 24.88)	0.238036	1.35 (1.07 - 1.70)	0.0115768	17.71 (0.73 - 428.31)	0.0769608	1.35 (1.06 - 1.72)	0.0165502	2.54 (0.12 - 55.66)	0.553943
rs9931543	1.35 (1.14 - 1.59)	0.000343825	2.13 (0.31 - 14.40)	0.439379	1.35 (1.07 - 1.70)	0.0115768	1.42 (0.07 - 27.10)	0.81719	1.35 (1.06 - 1.72)	0.0165502	10.00 (0.58 - 172.30)	0.112881
rs9964420	1.35 (1.14 - 1.59)	0.000343825	2.90 (0.22 - 37.97)	0.416849	1.35 (1.07 - 1.70)	0.0115768	3.03 (0.06 - 159.52)	0.583876	1.35 (1.06 - 1.72)	0.0165502	3.72 (0.07 - 196.72)	0.516115

## Sheet: S table 3
S table 3. Results of leave-one-out analysis in the MR of lung cancer, lung adenocarcinoma and lung squamous cell carcinoma.
SNP removed	Lung cancer				Lung adenocarcinoma				Lung squamous cell carcinoma
	Result from IVW with all the SNPs		Results of leave-one-out analysis		Result from IVW with all the SNPs		Results of leave-one-out analysis		Result from IVW with all the SNPs		Results of leave-one-out analysis
	OR (95%CI)	P-value	OR (95%CI)	P-value	OR (95%CI)	P-value	OR (95%CI)	P-value	OR (95%CI)	P-value	OR (95%CI)	P-value
rs1015438	1.35 (1.14 - 1.59)	0.000343825	1.34 (1.14 - 1.58)	0.000448686	1.35 (1.07 - 1.70)	0.0115768	1.35 (1.07 - 1.70)	0.0124568	1.35 (1.06 - 1.72)	0.0165502	1.35 (1.05 - 1.72)	0.0169251
rs1031654	1.35 (1.14 - 1.59)	0.000343825	1.34 (1.14 - 1.58)	0.000421009	1.35 (1.07 - 1.70)	0.0115768	1.35 (1.07 - 1.70)	0.0124894	1.35 (1.06 - 1.72)	0.0165502	1.34 (1.05 - 1.71)	0.0193442
rs1038093	1.35 (1.14 - 1.59)	0.000343825	1.35 (1.15 - 1.59)	0.000318771	1.35 (1.07 - 1.70)	0.0115768	1.35 (1.07 - 1.71)	0.0110282	1.35 (1.06 - 1.72)	0.0165502	1.35 (1.05 - 1.72)	0.017268
rs10502966	1.35 (1.14 - 1.59)	0.000343825	1.35 (1.14 - 1.59)	0.000366582	1.35 (1.07 - 1.70)	0.0115768	1.34 (1.07 - 1.70)	0.0127129	1.35 (1.06 - 1.72)	0.0165502	1.35 (1.06 - 1.73)	0.0149372
rs1064213	1.35 (1.14 - 1.59)	0.000343825	1.35 (1.15 - 1.59)	0.000337961	1.35 (1.07 - 1.70)	0.0115768	1.35 (1.07 - 1.70)	0.0123858	1.35 (1.06 - 1.72)	0.0165502	1.36 (1.06 - 1.73)	0.014413
rs10756571	1.35 (1.14 - 1.59)	0.000343825	1.35 (1.14 - 1.59)	0.00035321	1.35 (1.07 - 1.70)	0.0115768	1.35 (1.07 - 1.71)	0.0108738	1.35 (1.06 - 1.72)	0.0165502	1.36 (1.06 - 1.73)	0.0144847
rs10758593	1.35 (1.14 - 1.59)	0.000343825	1.35 (1.15 - 1.59)	0.000336433	1.35 (1.07 - 1.70)	0.0115768	1.35 (1.07 - 1.70)	0.0115108	1.35 (1.06 - 1.72)	0.0165502	1.32 (1.04 - 1.69)	0.0232643
rs10761240	1.35 (1.14 - 1.59)	0.000343825	1.36 (1.16 - 1.60)	0.00018536	1.35 (1.07 - 1.70)	0.0115768	1.36 (1.08 - 1.72)	0.00886602	1.35 (1.06 - 1.72)	0.0165502	1.37 (1.07 - 1.74)	0.0116973
rs10800992	1.35 (1.14 - 1.59)	0.000343825	1.35 (1.15 - 1.59)	0.000297703	1.35 (1.07 - 1.70)	0.0115768	1.36 (1.08 - 1.71)	0.00979931	1.35 (1.06 - 1.72)	0.0165502	1.35 (1.06 - 1.73)	0.0153007
rs10825503	1.35 (1.14 - 1.59)	0.000343825	1.35 (1.15 - 1.59)	0.000338468	1.35 (1.07 - 1.70)	0.0115768	1.34 (1.06 - 1.70)	0.0128666	1.35 (1.06 - 1.72)	0.0165502	1.35 (1.06 - 1.72)	0.0168098
rs10865954	1.35 (1.14 - 1.59)	0.000343825	1.33 (1.13 - 1.57)	0.000510896	1.35 (1.07 - 1.70)	0.0115768	1.33 (1.05 - 1.67)	0.0158914	1.35 (1.06 - 1.72)	0.0165502	1.33 (1.05 - 1.70)	0.0202396
rs10898940	1.35 (1.14 - 1.59)	0.000343825	1.34 (1.14 - 1.58)	0.000390909	1.35 (1.07 - 1.70)	0.0115768	1.35 (1.07 - 1.70)	0.0115729	1.35 (1.06 - 1.72)	0.0165502	1.34 (1.05 - 1.71)	0.0180066
rs10928256	1.35 (1.14 - 1.59)	0.000343825	1.35 (1.15 - 1.59)	0.000321891	1.35 (1.07 - 1.70)	0.0115768	1.37 (1.09 - 1.73)	0.00704912	1.35 (1.06 - 1.72)	0.0165502	1.34 (1.05 - 1.71)	0.0182871
rs10944696	1.35 (1.14 - 1.59)	0.000343825	1.35 (1.15 - 1.59)	0.000327498	1.35 (1.07 - 1.70)	0.0115768	1.35 (1.07 - 1.70)	0.0122669	1.35 (1.06 - 1.72)	0.0165502	1.35 (1.06 - 1.73)	0.0155658
rs10947428	1.35 (1.14 - 1.59)	0.000343825	1.33 (1.13 - 1.57)	0.000580028	1.35 (1.07 - 1.70)	0.0115768	1.33 (1.06 - 1.68)	0.01541	1.35 (1.06 - 1.72)	0.0165502	1.33 (1.04 - 1.69)	0.0231486
rs10947690	1.35 (1.14 - 1.59)	0.000343825	1.35 (1.15 - 1.59)	0.000281565	1.35 (1.07 - 1.70)	0.0115768	1.35 (1.07 - 1.70)	0.0117409	1.35 (1.06 - 1.72)	0.0165502	1.34 (1.05 - 1.72)	0.0176826
rs10947987	1.35 (1.14 - 1.59)	0.000343825	1.35 (1.15 - 1.59)	0.000316759	1.35 (1.07 - 1.70)	0.0115768	1.34 (1.06 - 1.69)	0.013182	1.35 (1.06 - 1.72)	0.0165502	1.35 (1.06 - 1.72)	0.0165207
rs10955647	1.35 (1.14 - 1.59)	0.000343825	1.35 (1.15 - 1.59)	0.000309892	1.35 (1.07 - 1.70)	0.0115768	1.36 (1.08 - 1.72)	0.00891464	1.35 (1.06 - 1.72)	0.0165502	1.35 (1.06 - 1.72)	0.0160001
rs11001276	1.35 (1.14 - 1.59)	0.000343825	1.34 (1.14 - 1.57)	0.000475024	1.35 (1.07 - 1.70)	0.0115768	1.34 (1.07 - 1.70)	0.0125957	1.35 (1.06 - 1.72)	0.0165502	1.33 (1.05 - 1.70)	0.0205627
rs11090039	1.35 (1.14 - 1.59)	0.000343825	1.35 (1.15 - 1.59)	0.000331952	1.35 (1.07 - 1.70)	0.0115768	1.36 (1.08 - 1.71)	0.00987235	1.35 (1.06 - 1.72)	0.0165502	1.34 (1.05 - 1.71)	0.0179461
rs11119409	1.35 (1.14 - 1.59)	0.000343825	1.34 (1.14 - 1.58)	0.000432456	1.35 (1.07 - 1.70)	0.0115768	1.35 (1.07 - 1.70)	0.0117999	1.35 (1.06 - 1.72)	0.0165502	1.34 (1.05 - 1.71)	0.0181182
rs11149313	1.35 (1.14 - 1.59)	0.000343825	1.36 (1.16 - 1.60)	0.000200911	1.35 (1.07 - 1.70)	0.0115768	1.35 (1.07 - 1.71)	0.0108801	1.35 (1.06 - 1.72)	0.0165502	1.37 (1.08 - 1.74)	0.0106848
rs113851554	1.35 (1.14 - 1.59)	0.000343825	1.35 (1.14 - 1.59)	0.000405433	1.35 (1.07 - 1.70)	0.0115768	1.34 (1.06 - 1.70)	0.01465	1.35 (1.06 - 1.72)	0.0165502	1.37 (1.07 - 1.75)	0.0133029
rs1147852	1.35 (1.14 - 1.59)	0.000343825	1.36 (1.16 - 1.60)	0.000204229	1.35 (1.07 - 1.70)	0.0115768	1.37 (1.09 - 1.73)	0.00747168	1.35 (1.06 - 1.72)	0.0165502	1.36 (1.06 - 1.73)	0.0138681
rs11588755	1.35 (1.14 - 1.59)	0.000343825	1.34 (1.14 - 1.57)	0.000470471	1.35 (1.07 - 1.70)	0.0115768	1.34 (1.06 - 1.69)	0.0133297	1.35 (1.06 - 1.72)	0.0165502	1.34 (1.05 - 1.71)	0.0193077
rs11605348	1.35 (1.14 - 1.59)	0.000343825	1.35 (1.14 - 1.59)	0.000368995	1.35 (1.07 - 1.70)	0.0115768	1.33 (1.06 - 1.68)	0.0152907	1.35 (1.06 - 1.72)	0.0165502	1.35 (1.06 - 1.72)	0.0167173
rs116466468	1.35 (1.14 - 1.59)	0.000343825	1.34 (1.14 - 1.58)	0.000421021	1.35 (1.07 - 1.70)	0.0115768	1.34 (1.06 - 1.69)	0.0142608	1.35 (1.06 - 1.72)	0.0165502	1.35 (1.06 - 1.73)	0.0149098
rs11650304	1.35 (1.14 - 1.59)	0.000343825	1.35 (1.14 - 1.59)	0.000346208	1.35 (1.07 - 1.70)	0.0115768	1.36 (1.08 - 1.71)	0.0100366	1.35 (1.06 - 1.72)	0.0165502	1.34 (1.05 - 1.72)	0.0177686
rs1167132	1.35 (1.14 - 1.59)	0.000343825	1.34 (1.14 - 1.58)	0.00040702	1.35 (1.07 - 1.70)	0.0115768	1.35 (1.07 - 1.70)	0.0120015	1.35 (1.06 - 1.72)	0.0165502	1.33 (1.05 - 1.70)	0.0204579
rs11679943	1.35 (1.14 - 1.59)	0.000343825	1.36 (1.16 - 1.60)	0.000190695	1.35 (1.07 - 1.70)	0.0115768	1.36 (1.08 - 1.72)	0.00895589	1.35 (1.06 - 1.72)	0.0165502	1.35 (1.06 - 1.73)	0.0147943
rs11722569	1.35 (1.14 - 1.59)	0.000343825	1.35 (1.14 - 1.59)	0.000358034	1.35 (1.07 - 1.70)	0.0115768	1.35 (1.07 - 1.70)	0.0115561	1.35 (1.06 - 1.72)	0.0165502	1.35 (1.05 - 1.72)	0.0170263
rs11756035	1.35 (1.14 - 1.59)	0.000343825	1.35 (1.15 - 1.59)	0.000274581	1.35 (1.07 - 1.70)	0.0115768	1.36 (1.08 - 1.71)	0.00998936	1.35 (1.06 - 1.72)	0.0165502	1.35 (1.06 - 1.73)	0.0154278
rs117630493	1.35 (1.14 - 1.59)	0.000343825	1.35 (1.15 - 1.59)	0.000298753	1.35 (1.07 - 1.70)	0.0115768	1.36 (1.08 - 1.72)	0.00895356	1.35 (1.06 - 1.72)	0.0165502	1.35 (1.05 - 1.72)	0.0171533
rs11803128	1.35 (1.14 - 1.59)	0.000343825	1.34 (1.14 - 1.58)	0.00044282	1.35 (1.07 - 1.70)	0.0115768	1.33 (1.06 - 1.68)	0.0149391	1.35 (1.06 - 1.72)	0.0165502	1.34 (1.05 - 1.71)	0.0184491
rs118166957	1.35 (1.14 - 1.59)	0.000343825	1.34 (1.13 - 1.57)	0.000510108	1.35 (1.07 - 1.70)	0.0115768	1.35 (1.07 - 1.71)	0.0111074	1.35 (1.06 - 1.72)	0.0165502	1.33 (1.04 - 1.70)	0.0217345
rs11838830	1.35 (1.14 - 1.59)	0.000343825	1.34 (1.14 - 1.58)	0.000437881	1.35 (1.07 - 1.70)	0.0115768	1.36 (1.07 - 1.71)	0.0104083	1.35 (1.06 - 1.72)	0.0165502	1.34 (1.05 - 1.71)	0.0196327
rs12030482	1.35 (1.14 - 1.59)	0.000343825	1.34 (1.14 - 1.58)	0.000399544	1.35 (1.07 - 1.70)	0.0115768	1.35 (1.07 - 1.71)	0.0111859	1.35 (1.06 - 1.72)	0.0165502	1.33 (1.05 - 1.70)	0.0201818
rs12187443	1.35 (1.14 - 1.59)	0.000343825	1.36 (1.15 - 1.60)	0.000248972	1.35 (1.07 - 1.70)	0.0115768	1.34 (1.06 - 1.69)	0.0140505	1.35 (1.06 - 1.72)	0.0165502	1.36 (1.07 - 1.73)	0.01349
rs12251016	1.35 (1.14 - 1.59)	0.000343825	1.35 (1.14 - 1.59)	0.000376908	1.35 (1.07 - 1.70)	0.0115768	1.34 (1.06 - 1.69)	0.0140111	1.35 (1.06 - 1.72)	0.0165502	1.35 (1.06 - 1.72)	0.0166222
rs12310246	1.35 (1.14 - 1.59)	0.000343825	1.35 (1.15 - 1.59)	0.000302749	1.35 (1.07 - 1.70)	0.0115768	1.34 (1.06 - 1.70)	0.0127797	1.35 (1.06 - 1.72)	0.0165502	1.35 (1.06 - 1.72)	0.0162261
rs12520974	1.35 (1.14 - 1.59)	0.000343825	1.35 (1.15 - 1.59)	0.000298155	1.35 (1.07 - 1.70)	0.0115768	1.35 (1.07 - 1.70)	0.0119452	1.35 (1.06 - 1.72)	0.0165502	1.35 (1.06 - 1.72)	0.0161597
rs12540241	1.35 (1.14 - 1.59)	0.000343825	1.36 (1.16 - 1.60)	0.000183425	1.35 (1.07 - 1.70)	0.0115768	1.37 (1.08 - 1.72)	0.00807532	1.35 (1.06 - 1.72)	0.0165502	1.36 (1.06 - 1.73)	0.0142746
rs12605642	1.35 (1.14 - 1.59)	0.000343825	1.34 (1.14 - 1.58)	0.000436317	1.35 (1.07 - 1.70)	0.0115768	1.34 (1.06 - 1.69)	0.013016	1.35 (1.06 - 1.72)	0.0165502	1.34 (1.05 - 1.71)	0.0195134
rs12614369	1.35 (1.14 - 1.59)	0.000343825	1.35 (1.14 - 1.58)	0.000380398	1.35 (1.07 - 1.70)	0.0115768	1.34 (1.06 - 1.69)	0.0131679	1.35 (1.06 - 1.72)	0.0165502	1.35 (1.06 - 1.72)	0.016831
rs12666306	1.35 (1.14 - 1.59)	0.000343825	1.35 (1.14 - 1.59)	0.000363681	1.35 (1.07 - 1.70)	0.0115768	1.34 (1.06 - 1.69)	0.0144152	1.35 (1.06 - 1.72)	0.0165502	1.35 (1.06 - 1.72)	0.0163392
rs12790660	1.35 (1.14 - 1.59)	0.000343825	1.33 (1.13 - 1.56)	0.000530073	1.35 (1.07 - 1.70)	0.0115768	1.34 (1.06 - 1.69)	0.0142003	1.35 (1.06 - 1.72)	0.0165502	1.33 (1.04 - 1.69)	0.021643
rs1289939	1.35 (1.14 - 1.59)	0.000343825	1.34 (1.14 - 1.58)	0.000400705	1.35 (1.07 - 1.70)	0.0115768	1.35 (1.07 - 1.70)	0.0120837	1.35 (1.06 - 1.72)	0.0165502	1.34 (1.05 - 1.71)	0.0194905
rs12912299	1.35 (1.14 - 1.59)	0.000343825	1.33 (1.13 - 1.56)	0.000583016	1.35 (1.07 - 1.70)	0.0115768	1.34 (1.06 - 1.69)	0.0133971	1.35 (1.06 - 1.72)	0.0165502	1.32 (1.04 - 1.68)	0.0251808
rs12917449	1.35 (1.14 - 1.59)	0.000343825	1.34 (1.14 - 1.58)	0.000421603	1.35 (1.07 - 1.70)	0.0115768	1.34 (1.06 - 1.69)	0.0135719	1.35 (1.06 - 1.72)	0.0165502	1.34 (1.05 - 1.71)	0.0186534
rs12924275	1.35 (1.14 - 1.59)	0.000343825	1.35 (1.15 - 1.59)	0.000293916	1.35 (1.07 - 1.70)	0.0115768	1.35 (1.07 - 1.71)	0.0104846	1.35 (1.06 - 1.72)	0.0165502	1.36 (1.06 - 1.73)	0.0141939
rs12983032	1.35 (1.14 - 1.59)	0.000343825	1.35 (1.14 - 1.59)	0.000350683	1.35 (1.07 - 1.70)	0.0115768	1.35 (1.07 - 1.71)	0.0112124	1.35 (1.06 - 1.72)	0.0165502	1.34 (1.05 - 1.72)	0.0175444
rs13010288	1.35 (1.14 - 1.59)	0.000343825	1.34 (1.14 - 1.58)	0.000471677	1.35 (1.07 - 1.70)	0.0115768	1.36 (1.08 - 1.71)	0.0101835	1.35 (1.06 - 1.72)	0.0165502	1.33 (1.04 - 1.70)	0.0215428
rs13135092	1.35 (1.14 - 1.59)	0.000343825	1.34 (1.14 - 1.58)	0.000464467	1.35 (1.07 - 1.70)	0.0115768	1.34 (1.06 - 1.70)	0.0131605	1.35 (1.06 - 1.72)	0.0165502	1.35 (1.06 - 1.72)	0.0167145
rs13138995	1.35 (1.14 - 1.59)	0.000343825	1.36 (1.16 - 1.60)	0.000176667	1.35 (1.07 - 1.70)	0.0115768	1.36 (1.08 - 1.72)	0.00924965	1.35 (1.06 - 1.72)	0.0165502	1.37 (1.08 - 1.75)	0.00988904
rs1357685	1.35 (1.14 - 1.59)	0.000343825	1.34 (1.14 - 1.58)	0.000392126	1.35 (1.07 - 1.70)	0.0115768	1.33 (1.06 - 1.68)	0.0151121	1.35 (1.06 - 1.72)	0.0165502	1.36 (1.07 - 1.74)	0.0128416
rs138014720	1.35 (1.14 - 1.59)	0.000343825	1.35 (1.15 - 1.59)	0.000280376	1.35 (1.07 - 1.70)	0.0115768	1.36 (1.08 - 1.71)	0.00949586	1.35 (1.06 - 1.72)	0.0165502	1.35 (1.06 - 1.73)	0.0155181
rs138678612	1.35 (1.14 - 1.59)	0.000343825	1.35 (1.15 - 1.59)	0.000294428	1.35 (1.07 - 1.70)	0.0115768	1.37 (1.09 - 1.73)	0.00731144	1.35 (1.06 - 1.72)	0.0165502	1.33 (1.05 - 1.70)	0.020459
rs1519102	1.35 (1.14 - 1.59)	0.000343825	1.34 (1.14 - 1.58)	0.000396328	1.35 (1.07 - 1.70)	0.0115768	1.35 (1.07 - 1.70)	0.0123366	1.35 (1.06 - 1.72)	0.0165502	1.33 (1.04 - 1.69)	0.0214964
rs152555	1.35 (1.14 - 1.59)	0.000343825	1.35 (1.15 - 1.59)	0.000329806	1.35 (1.07 - 1.70)	0.0115768	1.35 (1.07 - 1.71)	0.0105749	1.35 (1.06 - 1.72)	0.0165502	1.34 (1.05 - 1.71)	0.0193806
rs1530938	1.35 (1.14 - 1.59)	0.000343825	1.34 (1.14 - 1.58)	0.000390693	1.35 (1.07 - 1.70)	0.0115768	1.35 (1.07 - 1.70)	0.0119103	1.35 (1.06 - 1.72)	0.0165502	1.35 (1.06 - 1.72)	0.0166088
rs1536053	1.35 (1.14 - 1.59)	0.000343825	1.34 (1.14 - 1.58)	0.000423671	1.35 (1.07 - 1.70)	0.0115768	1.33 (1.06 - 1.68)	0.0149198	1.35 (1.06 - 1.72)	0.0165502	1.35 (1.06 - 1.73)	0.015481
rs1553754	1.35 (1.14 - 1.59)	0.000343825	1.34 (1.14 - 1.58)	0.000412604	1.35 (1.07 - 1.70)	0.0115768	1.33 (1.06 - 1.67)	0.0153269	1.35 (1.06 - 1.72)	0.0165502	1.35 (1.06 - 1.72)	0.0163068
rs1567084	1.35 (1.14 - 1.59)	0.000343825	1.35 (1.14 - 1.59)	0.000355336	1.35 (1.07 - 1.70)	0.0115768	1.35 (1.07 - 1.70)	0.011819	1.35 (1.06 - 1.72)	0.0165502	1.36 (1.06 - 1.73)	0.0138347
rs1580173	1.35 (1.14 - 1.59)	0.000343825	1.35 (1.15 - 1.59)	0.000292155	1.35 (1.07 - 1.70)	0.0115768	1.35 (1.07 - 1.70)	0.0123331	1.35 (1.06 - 1.72)	0.0165502	1.35 (1.06 - 1.72)	0.0159623
rs1620977	1.35 (1.14 - 1.59)	0.000343825	1.35 (1.14 - 1.59)	0.000382337	1.35 (1.07 - 1.70)	0.0115768	1.35 (1.07 - 1.71)	0.0111954	1.35 (1.06 - 1.72)	0.0165502	1.36 (1.06 - 1.73)	0.0144009
rs16903122	1.35 (1.14 - 1.59)	0.000343825	1.37 (1.16 - 1.61)	0.000161671	1.35 (1.07 - 1.70)	0.0115768	1.36 (1.08 - 1.72)	0.00893538	1.35 (1.06 - 1.72)	0.0165502	1.36 (1.07 - 1.74)	0.0126681
rs16990210	1.35 (1.14 - 1.59)	0.000343825	1.35 (1.14 - 1.59)	0.000372989	1.35 (1.07 - 1.70)	0.0115768	1.34 (1.06 - 1.69)	0.013216	1.35 (1.06 - 1.72)	0.0165502	1.35 (1.06 - 1.73)	0.0145884
rs17005118	1.35 (1.14 - 1.59)	0.000343825	1.34 (1.14 - 1.58)	0.00042595	1.35 (1.07 - 1.70)	0.0115768	1.34 (1.06 - 1.70)	0.0129683	1.35 (1.06 - 1.72)	0.0165502	1.35 (1.06 - 1.73)	0.0152753
rs17025198	1.35 (1.14 - 1.59)	0.000343825	1.35 (1.14 - 1.59)	0.00034479	1.35 (1.07 - 1.70)	0.0115768	1.37 (1.09 - 1.72)	0.00755247	1.35 (1.06 - 1.72)	0.0165502	1.34 (1.05 - 1.71)	0.0193299
rs17083297	1.35 (1.14 - 1.59)	0.000343825	1.35 (1.15 - 1.59)	0.000283889	1.35 (1.07 - 1.70)	0.0115768	1.35 (1.07 - 1.70)	0.0115366	1.35 (1.06 - 1.72)	0.0165502	1.35 (1.06 - 1.73)	0.0153162
rs17223714	1.35 (1.14 - 1.59)	0.000343825	1.34 (1.14 - 1.58)	0.000468909	1.35 (1.07 - 1.70)	0.0115768	1.32 (1.05 - 1.65)	0.018835	1.35 (1.06 - 1.72)	0.0165502	1.34 (1.05 - 1.71)	0.0185307
rs17367725	1.35 (1.14 - 1.59)	0.000343825	1.34 (1.14 - 1.58)	0.000409981	1.35 (1.07 - 1.70)	0.0115768	1.35 (1.07 - 1.70)	0.0119532	1.35 (1.06 - 1.72)	0.0165502	1.34 (1.05 - 1.71)	0.0185738
rs17520265	1.35 (1.14 - 1.59)	0.000343825	1.34 (1.14 - 1.58)	0.000396389	1.35 (1.07 - 1.70)	0.0115768	1.33 (1.06 - 1.68)	0.0147018	1.35 (1.06 - 1.72)	0.0165502	1.34 (1.05 - 1.72)	0.0175913
rs17643634	1.35 (1.14 - 1.59)	0.000343825	1.34 (1.14 - 1.58)	0.000442528	1.35 (1.07 - 1.70)	0.0115768	1.35 (1.07 - 1.70)	0.0119158	1.35 (1.06 - 1.72)	0.0165502	1.35 (1.06 - 1.72)	0.016766
rs176644	1.35 (1.14 - 1.59)	0.000343825	1.34 (1.14 - 1.58)	0.000407129	1.35 (1.07 - 1.70)	0.0115768	1.35 (1.07 - 1.71)	0.0106667	1.35 (1.06 - 1.72)	0.0165502	1.34 (1.05 - 1.71)	0.0186794
rs1861412	1.35 (1.14 - 1.59)	0.000343825	1.35 (1.14 - 1.58)	0.000382191	1.35 (1.07 - 1.70)	0.0115768	1.36 (1.08 - 1.72)	0.00905788	1.35 (1.06 - 1.72)	0.0165502	1.33 (1.04 - 1.70)	0.0207476
rs190073	1.35 (1.14 - 1.59)	0.000343825	1.34 (1.14 - 1.58)	0.000455932	1.35 (1.07 - 1.70)	0.0115768	1.34 (1.06 - 1.69)	0.0134277	1.35 (1.06 - 1.72)	0.0165502	1.35 (1.05 - 1.72)	0.0169102
rs1927902	1.35 (1.14 - 1.59)	0.000343825	1.34 (1.14 - 1.57)	0.000488813	1.35 (1.07 - 1.70)	0.0115768	1.35 (1.07 - 1.70)	0.0118779	1.35 (1.06 - 1.72)	0.0165502	1.34 (1.05 - 1.71)	0.019836
rs1937447	1.35 (1.14 - 1.59)	0.000343825	1.34 (1.14 - 1.58)	0.000423204	1.35 (1.07 - 1.70)	0.0115768	1.33 (1.06 - 1.68)	0.0144024	1.35 (1.06 - 1.72)	0.0165502	1.35 (1.05 - 1.72)	0.0172868
rs2089358	1.35 (1.14 - 1.59)	0.000343825	1.35 (1.15 - 1.59)	0.00027411	1.35 (1.07 - 1.70)	0.0115768	1.35 (1.07 - 1.71)	0.0110875	1.35 (1.06 - 1.72)	0.0165502	1.35 (1.06 - 1.73)	0.0154788
rs214934	1.35 (1.14 - 1.59)	0.000343825	1.35 (1.15 - 1.59)	0.000282514	1.35 (1.07 - 1.70)	0.0115768	1.37 (1.08 - 1.72)	0.00828878	1.35 (1.06 - 1.72)	0.0165502	1.35 (1.06 - 1.73)	0.0155398
rs2216427	1.35 (1.14 - 1.59)	0.000343825	1.34 (1.14 - 1.58)	0.00045354	1.35 (1.07 - 1.70)	0.0115768	1.35 (1.07 - 1.70)	0.0115991	1.35 (1.06 - 1.72)	0.0165502	1.33 (1.05 - 1.70)	0.0204098
rs224029	1.35 (1.14 - 1.59)	0.000343825	1.35 (1.15 - 1.59)	0.000285579	1.35 (1.07 - 1.70)	0.0115768	1.36 (1.08 - 1.71)	0.0100684	1.35 (1.06 - 1.72)	0.0165502	1.35 (1.06 - 1.73)	0.0150355
rs2286729	1.35 (1.14 - 1.59)	0.000343825	1.36 (1.15 - 1.60)	0.000231889	1.35 (1.07 - 1.70)	0.0115768	1.37 (1.09 - 1.73)	0.00742606	1.35 (1.06 - 1.72)	0.0165502	1.35 (1.06 - 1.73)	0.0152466
rs2364921	1.35 (1.14 - 1.59)	0.000343825	1.35 (1.15 - 1.59)	0.000315794	1.35 (1.07 - 1.70)	0.0115768	1.35 (1.07 - 1.70)	0.0122915	1.35 (1.06 - 1.72)	0.0165502	1.35 (1.06 - 1.72)	0.0166585
rs2388840	1.35 (1.14 - 1.59)	0.000343825	1.35 (1.14 - 1.59)	0.000370796	1.35 (1.07 - 1.70)	0.0115768	1.35 (1.07 - 1.70)	0.0122426	1.35 (1.06 - 1.72)	0.0165502	1.35 (1.06 - 1.72)	0.0163734
rs2389631	1.35 (1.14 - 1.59)	0.000343825	1.34 (1.14 - 1.58)	0.000461884	1.35 (1.07 - 1.70)	0.0115768	1.34 (1.06 - 1.69)	0.0144661	1.35 (1.06 - 1.72)	0.0165502	1.35 (1.06 - 1.72)	0.0165094
rs2398144	1.35 (1.14 - 1.59)	0.000343825	1.34 (1.14 - 1.58)	0.000437836	1.35 (1.07 - 1.70)	0.0115768	1.35 (1.07 - 1.71)	0.0105583	1.35 (1.06 - 1.72)	0.0165502	1.33 (1.04 - 1.69)	0.0215717
rs2431108	1.35 (1.14 - 1.59)	0.000343825	1.36 (1.16 - 1.60)	0.000223981	1.35 (1.07 - 1.70)	0.0115768	1.36 (1.08 - 1.71)	0.0100328	1.35 (1.06 - 1.72)	0.0165502	1.34 (1.05 - 1.71)	0.0185052
rs2447094	1.35 (1.14 - 1.59)	0.000343825	1.33 (1.13 - 1.57)	0.000505142	1.35 (1.07 - 1.70)	0.0115768	1.34 (1.06 - 1.70)	0.0127931	1.35 (1.06 - 1.72)	0.0165502	1.33 (1.04 - 1.69)	0.0219561
rs2491124	1.35 (1.14 - 1.59)	0.000343825	1.34 (1.14 - 1.58)	0.000437436	1.35 (1.07 - 1.70)	0.0115768	1.31 (1.04 - 1.65)	0.0213965	1.35 (1.06 - 1.72)	0.0165502	1.34 (1.05 - 1.71)	0.0201484
rs2598293	1.35 (1.14 - 1.59)	0.000343825	1.35 (1.15 - 1.59)	0.000310523	1.35 (1.07 - 1.70)	0.0115768	1.35 (1.07 - 1.71)	0.0109256	1.35 (1.06 - 1.72)	0.0165502	1.33 (1.05 - 1.70)	0.0201817
rs2737240	1.35 (1.14 - 1.59)	0.000343825	1.36 (1.16 - 1.60)	0.000185917	1.35 (1.07 - 1.70)	0.0115768	1.36 (1.08 - 1.71)	0.00994855	1.35 (1.06 - 1.72)	0.0165502	1.36 (1.07 - 1.73)	0.0133617
rs2792990	1.35 (1.14 - 1.59)	0.000343825	1.35 (1.15 - 1.59)	0.000314827	1.35 (1.07 - 1.70)	0.0115768	1.36 (1.08 - 1.72)	0.00873081	1.35 (1.06 - 1.72)	0.0165502	1.35 (1.06 - 1.72)	0.0167671
rs2815757	1.35 (1.14 - 1.59)	0.000343825	1.36 (1.15 - 1.60)	0.000241021	1.35 (1.07 - 1.70)	0.0115768	1.36 (1.08 - 1.72)	0.00860918	1.35 (1.06 - 1.72)	0.0165502	1.36 (1.06 - 1.73)	0.0140674
rs2838787	1.35 (1.14 - 1.59)	0.000343825	1.34 (1.14 - 1.58)	0.000462587	1.35 (1.07 - 1.70)	0.0115768	1.35 (1.07 - 1.70)	0.0118199	1.35 (1.06 - 1.72)	0.0165502	1.34 (1.05 - 1.71)	0.0195153
rs28552587	1.35 (1.14 - 1.59)	0.000343825	1.35 (1.14 - 1.59)	0.000359131	1.35 (1.07 - 1.70)	0.0115768	1.34 (1.06 - 1.68)	0.0145449	1.35 (1.06 - 1.72)	0.0165502	1.35 (1.06 - 1.73)	0.0150343
rs28582096	1.35 (1.14 - 1.59)	0.000343825	1.34 (1.14 - 1.58)	0.000400067	1.35 (1.07 - 1.70)	0.0115768	1.35 (1.07 - 1.71)	0.0107128	1.35 (1.06 - 1.72)	0.0165502	1.33 (1.04 - 1.70)	0.0207291
rs28611339	1.35 (1.14 - 1.59)	0.000343825	1.35 (1.14 - 1.59)	0.000353761	1.35 (1.07 - 1.70)	0.0115768	1.35 (1.07 - 1.71)	0.0114149	1.35 (1.06 - 1.72)	0.0165502	1.34 (1.05 - 1.71)	0.0178924
rs2867690	1.35 (1.14 - 1.59)	0.000343825	1.35 (1.15 - 1.59)	0.000340239	1.35 (1.07 - 1.70)	0.0115768	1.34 (1.06 - 1.70)	0.0128379	1.35 (1.06 - 1.72)	0.0165502	1.35 (1.06 - 1.72)	0.0168361
rs2903385	1.35 (1.14 - 1.59)	0.000343825	1.34 (1.14 - 1.57)	0.000488048	1.35 (1.07 - 1.70)	0.0115768	1.35 (1.07 - 1.70)	0.0123952	1.35 (1.06 - 1.72)	0.0165502	1.33 (1.04 - 1.70)	0.0210415
rs3131638	1.35 (1.14 - 1.59)	0.000343825	1.35 (1.15 - 1.59)	0.00027949	1.35 (1.07 - 1.70)	0.0115768	1.37 (1.09 - 1.73)	0.00686463	1.35 (1.06 - 1.72)	0.0165502	1.34 (1.05 - 1.71)	0.0195571
rs314281	1.35 (1.14 - 1.59)	0.000343825	1.34 (1.14 - 1.58)	0.000434765	1.35 (1.07 - 1.70)	0.0115768	1.33 (1.06 - 1.68)	0.0148939	1.35 (1.06 - 1.72)	0.0165502	1.34 (1.05 - 1.72)	0.0178422
rs3184470	1.35 (1.14 - 1.59)	0.000343825	1.35 (1.14 - 1.59)	0.000363108	1.35 (1.07 - 1.70)	0.0115768	1.35 (1.07 - 1.71)	0.0107948	1.35 (1.06 - 1.72)	0.0165502	1.34 (1.05 - 1.71)	0.0186323
rs324017	1.35 (1.14 - 1.59)	0.000343825	1.34 (1.14 - 1.58)	0.000461294	1.35 (1.07 - 1.70)	0.0115768	1.33 (1.06 - 1.68)	0.0146015	1.35 (1.06 - 1.72)	0.0165502	1.33 (1.04 - 1.69)	0.0214149
rs34036083	1.35 (1.14 - 1.59)	0.000343825	1.35 (1.14 - 1.59)	0.000370657	1.35 (1.07 - 1.70)	0.0115768	1.35 (1.07 - 1.70)	0.0124728	1.35 (1.06 - 1.72)	0.0165502	1.36 (1.06 - 1.73)	0.0138019
rs34214423	1.35 (1.14 - 1.59)	0.000343825	1.35 (1.14 - 1.58)	0.00038181	1.35 (1.07 - 1.70)	0.0115768	1.34 (1.06 - 1.69)	0.0137136	1.35 (1.06 - 1.72)	0.0165502	1.35 (1.06 - 1.73)	0.0155602
rs34490907	1.35 (1.14 - 1.59)	0.000343825	1.35 (1.15 - 1.59)	0.000291643	1.35 (1.07 - 1.70)	0.0115768	1.36 (1.07 - 1.71)	0.0103915	1.35 (1.06 - 1.72)	0.0165502	1.35 (1.06 - 1.73)	0.0147302
rs34967082	1.35 (1.14 - 1.59)	0.000343825	1.35 (1.15 - 1.59)	0.000293114	1.35 (1.07 - 1.70)	0.0115768	1.36 (1.08 - 1.71)	0.00979856	1.35 (1.06 - 1.72)	0.0165502	1.34 (1.05 - 1.72)	0.0176549
rs35110063	1.35 (1.14 - 1.59)	0.000343825	1.34 (1.14 - 1.58)	0.000444898	1.35 (1.07 - 1.70)	0.0115768	1.36 (1.08 - 1.71)	0.0101341	1.35 (1.06 - 1.72)	0.0165502	1.34 (1.05 - 1.71)	0.018253
rs35322724	1.35 (1.14 - 1.59)	0.000343825	1.34 (1.14 - 1.58)	0.000446886	1.35 (1.07 - 1.70)	0.0115768	1.35 (1.07 - 1.71)	0.0111565	1.35 (1.06 - 1.72)	0.0165502	1.34 (1.05 - 1.71)	0.0202131
rs35539975	1.35 (1.14 - 1.59)	0.000343825	1.34 (1.14 - 1.58)	0.000454855	1.35 (1.07 - 1.70)	0.0115768	1.34 (1.06 - 1.69)	0.0134314	1.35 (1.06 - 1.72)	0.0165502	1.35 (1.06 - 1.73)	0.014886
rs37445	1.35 (1.14 - 1.59)	0.000343825	1.35 (1.15 - 1.59)	0.000290779	1.35 (1.07 - 1.70)	0.0115768	1.35 (1.07 - 1.71)	0.0111552	1.35 (1.06 - 1.72)	0.0165502	1.36 (1.07 - 1.74)	0.0126043
rs3774751	1.35 (1.14 - 1.59)	0.000343825	1.34 (1.14 - 1.58)	0.000391663	1.35 (1.07 - 1.70)	0.0115768	1.34 (1.06 - 1.69)	0.0136256	1.35 (1.06 - 1.72)	0.0165502	1.34 (1.05 - 1.72)	0.0179237
rs3902952	1.35 (1.14 - 1.59)	0.000343825	1.34 (1.14 - 1.58)	0.000456063	1.35 (1.07 - 1.70)	0.0115768	1.35 (1.07 - 1.71)	0.0112157	1.35 (1.06 - 1.72)	0.0165502	1.34 (1.05 - 1.71)	0.0190723
rs4090240	1.35 (1.14 - 1.59)	0.000343825	1.36 (1.16 - 1.60)	0.000206629	1.35 (1.07 - 1.70)	0.0115768	1.35 (1.07 - 1.71)	0.0113292	1.35 (1.06 - 1.72)	0.0165502	1.36 (1.07 - 1.74)	0.0120953
rs4238755	1.35 (1.14 - 1.59)	0.000343825	1.36 (1.15 - 1.60)	0.000256047	1.35 (1.07 - 1.70)	0.0115768	1.35 (1.07 - 1.71)	0.0111477	1.35 (1.06 - 1.72)	0.0165502	1.35 (1.06 - 1.72)	0.0161543
rs4260410	1.35 (1.14 - 1.59)	0.000343825	1.36 (1.15 - 1.60)	0.000229606	1.35 (1.07 - 1.70)	0.0115768	1.35 (1.07 - 1.71)	0.0110332	1.35 (1.06 - 1.72)	0.0165502	1.38 (1.08 - 1.75)	0.00931972
rs429358	1.35 (1.14 - 1.59)	0.000343825	1.34 (1.14 - 1.58)	0.000394787	1.35 (1.07 - 1.70)	0.0115768	1.35 (1.07 - 1.70)	0.0120438	1.35 (1.06 - 1.72)	0.0165502	1.34 (1.05 - 1.72)	0.0175962
rs4502882	1.35 (1.14 - 1.59)	0.000343825	1.35 (1.15 - 1.59)	0.000314543	1.35 (1.07 - 1.70)	0.0115768	1.37 (1.09 - 1.72)	0.00786879	1.35 (1.06 - 1.72)	0.0165502	1.34 (1.05 - 1.71)	0.0192424
rs45453598	1.35 (1.14 - 1.59)	0.000343825	1.36 (1.15 - 1.59)	0.00024637	1.35 (1.07 - 1.70)	0.0115768	1.35 (1.07 - 1.71)	0.0107788	1.35 (1.06 - 1.72)	0.0165502	1.38 (1.09 - 1.75)	0.0078882
rs4588900	1.35 (1.14 - 1.59)	0.000343825	1.35 (1.15 - 1.59)	0.000269401	1.35 (1.07 - 1.70)	0.0115768	1.35 (1.07 - 1.71)	0.0110718	1.35 (1.06 - 1.72)	0.0165502	1.35 (1.06 - 1.72)	0.0161877
rs4592425	1.35 (1.14 - 1.59)	0.000343825	1.34 (1.14 - 1.58)	0.000435087	1.35 (1.07 - 1.70)	0.0115768	1.34 (1.06 - 1.69)	0.0130664	1.35 (1.06 - 1.72)	0.0165502	1.33 (1.05 - 1.70)	0.0204087
rs4643373	1.35 (1.14 - 1.59)	0.000343825	1.35 (1.15 - 1.59)	0.000324843	1.35 (1.07 - 1.70)	0.0115768	1.35 (1.07 - 1.70)	0.011958	1.35 (1.06 - 1.72)	0.0165502	1.35 (1.06 - 1.73)	0.0155847
rs4664299	1.35 (1.14 - 1.59)	0.000343825	1.34 (1.14 - 1.58)	0.00040829	1.35 (1.07 - 1.70)	0.0115768	1.35 (1.07 - 1.70)	0.0125193	1.35 (1.06 - 1.72)	0.0165502	1.34 (1.05 - 1.71)	0.0192656
rs4699157	1.35 (1.14 - 1.59)	0.000343825	1.34 (1.14 - 1.58)	0.000396429	1.35 (1.07 - 1.70)	0.0115768	1.36 (1.07 - 1.71)	0.0103734	1.35 (1.06 - 1.72)	0.0165502	1.34 (1.05 - 1.71)	0.0180141
rs4702	1.35 (1.14 - 1.59)	0.000343825	1.34 (1.14 - 1.58)	0.000401488	1.35 (1.07 - 1.70)	0.0115768	1.34 (1.06 - 1.69)	0.0144675	1.35 (1.06 - 1.72)	0.0165502	1.33 (1.04 - 1.70)	0.0207918
rs4709655	1.35 (1.14 - 1.59)	0.000343825	1.35 (1.14 - 1.59)	0.00034823	1.35 (1.07 - 1.70)	0.0115768	1.35 (1.07 - 1.70)	0.0117457	1.35 (1.06 - 1.72)	0.0165502	1.36 (1.06 - 1.73)	0.0144686
rs4767645	1.35 (1.14 - 1.59)	0.000343825	1.35 (1.15 - 1.59)	0.000322881	1.35 (1.07 - 1.70)	0.0115768	1.35 (1.07 - 1.70)	0.011997	1.35 (1.06 - 1.72)	0.0165502	1.35 (1.05 - 1.72)	0.0168868
rs4788203	1.35 (1.14 - 1.59)	0.000343825	1.35 (1.14 - 1.58)	0.000375785	1.35 (1.07 - 1.70)	0.0115768	1.35 (1.07 - 1.70)	0.012248	1.35 (1.06 - 1.72)	0.0165502	1.35 (1.06 - 1.73)	0.0154014
rs4790076	1.35 (1.14 - 1.59)	0.000343825	1.35 (1.15 - 1.59)	0.000322732	1.35 (1.07 - 1.70)	0.0115768	1.35 (1.07 - 1.70)	0.0118667	1.35 (1.06 - 1.72)	0.0165502	1.35 (1.06 - 1.72)	0.0162847
rs492858	1.35 (1.14 - 1.59)	0.000343825	1.35 (1.14 - 1.58)	0.000378835	1.35 (1.07 - 1.70)	0.0115768	1.33 (1.06 - 1.68)	0.0152703	1.35 (1.06 - 1.72)	0.0165502	1.36 (1.07 - 1.74)	0.0126244
rs4981170	1.35 (1.14 - 1.59)	0.000343825	1.35 (1.15 - 1.59)	0.000313653	1.35 (1.07 - 1.70)	0.0115768	1.35 (1.07 - 1.70)	0.0118499	1.35 (1.06 - 1.72)	0.0165502	1.35 (1.06 - 1.73)	0.0151236
rs521484	1.35 (1.14 - 1.59)	0.000343825	1.36 (1.15 - 1.60)	0.000253424	1.35 (1.07 - 1.70)	0.0115768	1.35 (1.07 - 1.71)	0.0107524	1.35 (1.06 - 1.72)	0.0165502	1.35 (1.06 - 1.72)	0.0163586
rs524859	1.35 (1.14 - 1.59)	0.000343825	1.35 (1.15 - 1.59)	0.000296158	1.35 (1.07 - 1.70)	0.0115768	1.37 (1.08 - 1.72)	0.00849493	1.35 (1.06 - 1.72)	0.0165502	1.34 (1.05 - 1.72)	0.0179232
rs55772859	1.35 (1.14 - 1.59)	0.000343825	1.35 (1.15 - 1.59)	0.00031597	1.35 (1.07 - 1.70)	0.0115768	1.36 (1.08 - 1.71)	0.00990368	1.35 (1.06 - 1.72)	0.0165502	1.35 (1.05 - 1.72)	0.0168862
rs55972276	1.35 (1.14 - 1.59)	0.000343825	1.34 (1.14 - 1.58)	0.000441416	1.35 (1.07 - 1.70)	0.0115768	1.35 (1.07 - 1.70)	0.0116806	1.35 (1.06 - 1.72)	0.0165502	1.34 (1.05 - 1.71)	0.0191143
rs56097173	1.35 (1.14 - 1.59)	0.000343825	1.34 (1.14 - 1.58)	0.000411853	1.35 (1.07 - 1.70)	0.0115768	1.35 (1.07 - 1.70)	0.0122497	1.35 (1.06 - 1.72)	0.0165502	1.33 (1.04 - 1.70)	0.0215307
rs56133505	1.35 (1.14 - 1.59)	0.000343825	1.36 (1.15 - 1.60)	0.000233597	1.35 (1.07 - 1.70)	0.0115768	1.37 (1.08 - 1.72)	0.00848718	1.35 (1.06 - 1.72)	0.0165502	1.36 (1.06 - 1.73)	0.0140555
rs566673	1.35 (1.14 - 1.59)	0.000343825	1.34 (1.14 - 1.58)	0.000405741	1.35 (1.07 - 1.70)	0.0115768	1.33 (1.06 - 1.68)	0.0152952	1.35 (1.06 - 1.72)	0.0165502	1.35 (1.05 - 1.72)	0.0172049
rs5877	1.35 (1.14 - 1.59)	0.000343825	1.35 (1.14 - 1.58)	0.000381566	1.35 (1.07 - 1.70)	0.0115768	1.35 (1.07 - 1.71)	0.0108963	1.35 (1.06 - 1.72)	0.0165502	1.35 (1.05 - 1.72)	0.0169022
rs6019663	1.35 (1.14 - 1.59)	0.000343825	1.34 (1.14 - 1.58)	0.000387311	1.35 (1.07 - 1.70)	0.0115768	1.36 (1.07 - 1.71)	0.0101999	1.35 (1.06 - 1.72)	0.0165502	1.34 (1.05 - 1.71)	0.0182766
rs60565673	1.35 (1.14 - 1.59)	0.000343825	1.35 (1.15 - 1.60)	0.000273674	1.35 (1.07 - 1.70)	0.0115768	1.36 (1.07 - 1.71)	0.01032	1.35 (1.06 - 1.72)	0.0165502	1.35 (1.05 - 1.72)	0.0169223
rs6119267	1.35 (1.14 - 1.59)	0.000343825	1.35 (1.14 - 1.59)	0.000385205	1.35 (1.07 - 1.70)	0.0115768	1.36 (1.07 - 1.71)	0.0105251	1.35 (1.06 - 1.72)	0.0165502	1.35 (1.05 - 1.72)	0.0172981
rs61765555	1.35 (1.14 - 1.59)	0.000343825	1.34 (1.14 - 1.58)	0.000419094	1.35 (1.07 - 1.70)	0.0115768	1.34 (1.06 - 1.69)	0.0134688	1.35 (1.06 - 1.72)	0.0165502	1.34 (1.05 - 1.72)	0.0174482
rs61921611	1.35 (1.14 - 1.59)	0.000343825	1.35 (1.14 - 1.58)	0.000386936	1.35 (1.07 - 1.70)	0.0115768	1.35 (1.07 - 1.71)	0.0111417	1.35 (1.06 - 1.72)	0.0165502	1.34 (1.05 - 1.71)	0.0193107
rs62068188	1.35 (1.14 - 1.59)	0.000343825	1.35 (1.15 - 1.59)	0.000307026	1.35 (1.07 - 1.70)	0.0115768	1.35 (1.07 - 1.70)	0.0113747	1.35 (1.06 - 1.72)	0.0165502	1.35 (1.06 - 1.73)	0.0151879
rs62149809	1.35 (1.14 - 1.59)	0.000343825	1.35 (1.15 - 1.59)	0.0003141	1.35 (1.07 - 1.70)	0.0115768	1.36 (1.08 - 1.71)	0.00994735	1.35 (1.06 - 1.72)	0.0165502	1.35 (1.06 - 1.72)	0.0161329
rs62158170	1.35 (1.14 - 1.59)	0.000343825	1.35 (1.15 - 1.59)	0.000316485	1.35 (1.07 - 1.70)	0.0115768	1.35 (1.07 - 1.70)	0.0120724	1.35 (1.06 - 1.72)	0.0165502	1.36 (1.07 - 1.74)	0.0136832
rs62194948	1.35 (1.14 - 1.59)	0.000343825	1.35 (1.15 - 1.59)	0.00027996	1.35 (1.07 - 1.70)	0.0115768	1.35 (1.07 - 1.70)	0.0113588	1.35 (1.06 - 1.72)	0.0165502	1.36 (1.07 - 1.74)	0.011906
rs62213452	1.35 (1.14 - 1.59)	0.000343825	1.35 (1.15 - 1.59)	0.000338479	1.35 (1.07 - 1.70)	0.0115768	1.35 (1.07 - 1.70)	0.011443	1.35 (1.06 - 1.72)	0.0165502	1.34 (1.05 - 1.72)	0.0174223
rs62264767	1.35 (1.14 - 1.59)	0.000343825	1.33 (1.13 - 1.56)	0.000632405	1.35 (1.07 - 1.70)	0.0115768	1.30 (1.04 - 1.64)	0.0227007	1.35 (1.06 - 1.72)	0.0165502	1.35 (1.06 - 1.72)	0.0168218
rs62301574	1.35 (1.14 - 1.59)	0.000343825	1.35 (1.15 - 1.59)	0.000331328	1.35 (1.07 - 1.70)	0.0115768	1.35 (1.07 - 1.70)	0.0114306	1.35 (1.06 - 1.72)	0.0165502	1.34 (1.05 - 1.71)	0.0181359
rs623025	1.35 (1.14 - 1.59)	0.000343825	1.34 (1.14 - 1.58)	0.000397231	1.35 (1.07 - 1.70)	0.0115768	1.35 (1.07 - 1.70)	0.0118169	1.35 (1.06 - 1.72)	0.0165502	1.35 (1.05 - 1.72)	0.0169412
rs62383308	1.35 (1.14 - 1.59)	0.000343825	1.35 (1.15 - 1.59)	0.000330636	1.35 (1.07 - 1.70)	0.0115768	1.34 (1.06 - 1.69)	0.0134949	1.35 (1.06 - 1.72)	0.0165502	1.35 (1.05 - 1.72)	0.0170848
rs62429521	1.35 (1.14 - 1.59)	0.000343825	1.35 (1.15 - 1.59)	0.000279775	1.35 (1.07 - 1.70)	0.0115768	1.35 (1.07 - 1.71)	0.0108923	1.35 (1.06 - 1.72)	0.0165502	1.36 (1.07 - 1.74)	0.0129258
rs6457796	1.35 (1.14 - 1.59)	0.000343825	1.34 (1.14 - 1.58)	0.000392441	1.35 (1.07 - 1.70)	0.0115768	1.35 (1.07 - 1.71)	0.0113263	1.35 (1.06 - 1.72)	0.0165502	1.34 (1.05 - 1.71)	0.0186095
rs6465151	1.35 (1.14 - 1.59)	0.000343825	1.35 (1.14 - 1.58)	0.000378817	1.35 (1.07 - 1.70)	0.0115768	1.34 (1.07 - 1.70)	0.0126981	1.35 (1.06 - 1.72)	0.0165502	1.35 (1.05 - 1.72)	0.0173843
rs647905	1.35 (1.14 - 1.59)	0.000343825	1.35 (1.14 - 1.59)	0.000362661	1.35 (1.07 - 1.70)	0.0115768	1.35 (1.07 - 1.71)	0.0112704	1.35 (1.06 - 1.72)	0.0165502	1.34 (1.05 - 1.71)	0.0195783
rs6510033	1.35 (1.14 - 1.59)	0.000343825	1.34 (1.14 - 1.58)	0.000413991	1.35 (1.07 - 1.70)	0.0115768	1.35 (1.07 - 1.70)	0.0113106	1.35 (1.06 - 1.72)	0.0165502	1.33 (1.04 - 1.70)	0.0208922
rs6562066	1.35 (1.14 - 1.59)	0.000343825	1.34 (1.14 - 1.58)	0.00039166	1.35 (1.07 - 1.70)	0.0115768	1.34 (1.06 - 1.69)	0.0143353	1.35 (1.06 - 1.72)	0.0165502	1.36 (1.07 - 1.74)	0.0127464
rs6589988	1.35 (1.14 - 1.59)	0.000343825	1.34 (1.14 - 1.58)	0.000448145	1.35 (1.07 - 1.70)	0.0115768	1.35 (1.07 - 1.71)	0.0106159	1.35 (1.06 - 1.72)	0.0165502	1.34 (1.05 - 1.70)	0.0200005
rs6597649	1.35 (1.14 - 1.59)	0.000343825	1.35 (1.14 - 1.59)	0.000341274	1.35 (1.07 - 1.70)	0.0115768	1.36 (1.08 - 1.72)	0.00941531	1.35 (1.06 - 1.72)	0.0165502	1.36 (1.07 - 1.73)	0.0132656
rs6601080	1.35 (1.14 - 1.59)	0.000343825	1.36 (1.15 - 1.60)	0.000245436	1.35 (1.07 - 1.70)	0.0115768	1.36 (1.08 - 1.72)	0.00840876	1.35 (1.06 - 1.72)	0.0165502	1.36 (1.06 - 1.73)	0.0140514
rs6606731	1.35 (1.14 - 1.59)	0.000343825	1.35 (1.15 - 1.59)	0.000300588	1.35 (1.07 - 1.70)	0.0115768	1.35 (1.07 - 1.70)	0.0115148	1.35 (1.06 - 1.72)	0.0165502	1.35 (1.06 - 1.72)	0.0159348
rs66674044	1.35 (1.14 - 1.59)	0.000343825	1.35 (1.14 - 1.59)	0.000365548	1.35 (1.07 - 1.70)	0.0115768	1.35 (1.07 - 1.71)	0.0107769	1.35 (1.06 - 1.72)	0.0165502	1.37 (1.07 - 1.74)	0.01178
rs667730	1.35 (1.14 - 1.59)	0.000343825	1.35 (1.14 - 1.58)	0.000380671	1.35 (1.07 - 1.70)	0.0115768	1.34 (1.06 - 1.69)	0.0129624	1.35 (1.06 - 1.72)	0.0165502	1.35 (1.06 - 1.73)	0.0150328
rs6702604	1.35 (1.14 - 1.59)	0.000343825	1.35 (1.14 - 1.59)	0.000352601	1.35 (1.07 - 1.70)	0.0115768	1.35 (1.07 - 1.71)	0.0110733	1.35 (1.06 - 1.72)	0.0165502	1.35 (1.06 - 1.73)	0.0151153
rs670501	1.35 (1.14 - 1.59)	0.000343825	1.34 (1.14 - 1.58)	0.000395943	1.35 (1.07 - 1.70)	0.0115768	1.33 (1.05 - 1.67)	0.0168783	1.35 (1.06 - 1.72)	0.0165502	1.36 (1.06 - 1.73)	0.0146874
rs671985	1.35 (1.14 - 1.59)	0.000343825	1.34 (1.14 - 1.58)	0.000401671	1.35 (1.07 - 1.70)	0.0115768	1.35 (1.07 - 1.70)	0.0119008	1.35 (1.06 - 1.72)	0.0165502	1.32 (1.04 - 1.69)	0.0232595
rs6734957	1.35 (1.14 - 1.59)	0.000343825	1.34 (1.14 - 1.58)	0.00038652	1.35 (1.07 - 1.70)	0.0115768	1.34 (1.06 - 1.70)	0.0128012	1.35 (1.06 - 1.72)	0.0165502	1.34 (1.05 - 1.72)	0.0175809
rs67501351	1.35 (1.14 - 1.59)	0.000343825	1.35 (1.15 - 1.60)	0.000266126	1.35 (1.07 - 1.70)	0.0115768	1.35 (1.07 - 1.70)	0.0116189	1.35 (1.06 - 1.72)	0.0165502	1.35 (1.06 - 1.73)	0.0148979
rs6756610	1.35 (1.14 - 1.59)	0.000343825	1.35 (1.14 - 1.59)	0.000363697	1.35 (1.07 - 1.70)	0.0115768	1.36 (1.08 - 1.71)	0.0099449	1.35 (1.06 - 1.72)	0.0165502	1.34 (1.05 - 1.70)	0.0200736
rs6808140	1.35 (1.14 - 1.59)	0.000343825	1.34 (1.14 - 1.58)	0.000434336	1.35 (1.07 - 1.70)	0.0115768	1.34 (1.06 - 1.69)	0.0134836	1.35 (1.06 - 1.72)	0.0165502	1.35 (1.06 - 1.72)	0.0162716
rs6888135	1.35 (1.14 - 1.59)	0.000343825	1.36 (1.15 - 1.60)	0.000255841	1.35 (1.07 - 1.70)	0.0115768	1.35 (1.07 - 1.71)	0.011147	1.35 (1.06 - 1.72)	0.0165502	1.37 (1.07 - 1.74)	0.0110584
rs694786	1.35 (1.14 - 1.59)	0.000343825	1.34 (1.14 - 1.58)	0.000438993	1.35 (1.07 - 1.70)	0.0115768	1.34 (1.06 - 1.69)	0.0140529	1.35 (1.06 - 1.72)	0.0165502	1.34 (1.05 - 1.71)	0.0192153
rs6967168	1.35 (1.14 - 1.59)	0.000343825	1.36 (1.15 - 1.60)	0.000247339	1.35 (1.07 - 1.70)	0.0115768	1.35 (1.07 - 1.71)	0.0105772	1.35 (1.06 - 1.72)	0.0165502	1.36 (1.06 - 1.73)	0.0141882
rs6973090	1.35 (1.14 - 1.59)	0.000343825	1.35 (1.15 - 1.59)	0.000264651	1.35 (1.07 - 1.70)	0.0115768	1.36 (1.08 - 1.71)	0.00953216	1.35 (1.06 - 1.72)	0.0165502	1.35 (1.06 - 1.72)	0.0158921
rs6978112	1.35 (1.14 - 1.59)	0.000343825	1.34 (1.14 - 1.58)	0.00038523	1.35 (1.07 - 1.70)	0.0115768	1.35 (1.07 - 1.71)	0.0109078	1.35 (1.06 - 1.72)	0.0165502	1.35 (1.06 - 1.72)	0.015855
rs699844	1.35 (1.14 - 1.59)	0.000343825	1.34 (1.14 - 1.58)	0.000430296	1.35 (1.07 - 1.70)	0.0115768	1.34 (1.06 - 1.69)	0.0136332	1.35 (1.06 - 1.72)	0.0165502	1.33 (1.05 - 1.70)	0.0200133
rs701394	1.35 (1.14 - 1.59)	0.000343825	1.35 (1.15 - 1.59)	0.000291639	1.35 (1.07 - 1.70)	0.0115768	1.35 (1.07 - 1.70)	0.0114736	1.35 (1.06 - 1.72)	0.0165502	1.35 (1.06 - 1.73)	0.0147953
rs7040224	1.35 (1.14 - 1.59)	0.000343825	1.33 (1.13 - 1.57)	0.000492589	1.35 (1.07 - 1.70)	0.0115768	1.34 (1.06 - 1.69)	0.0139456	1.35 (1.06 - 1.72)	0.0165502	1.32 (1.04 - 1.69)	0.0223597
rs715338	1.35 (1.14 - 1.59)	0.000343825	1.35 (1.15 - 1.59)	0.00031888	1.35 (1.07 - 1.70)	0.0115768	1.36 (1.07 - 1.71)	0.0104463	1.35 (1.06 - 1.72)	0.0165502	1.34 (1.05 - 1.71)	0.0197164
rs71575448	1.35 (1.14 - 1.59)	0.000343825	1.34 (1.14 - 1.58)	0.000417333	1.35 (1.07 - 1.70)	0.0115768	1.35 (1.07 - 1.70)	0.0115938	1.35 (1.06 - 1.72)	0.0165502	1.35 (1.05 - 1.72)	0.017315
rs7168238	1.35 (1.14 - 1.59)	0.000343825	1.35 (1.14 - 1.59)	0.000355338	1.35 (1.07 - 1.70)	0.0115768	1.36 (1.08 - 1.71)	0.00960628	1.35 (1.06 - 1.72)	0.0165502	1.34 (1.05 - 1.71)	0.0196042
rs7214267	1.35 (1.14 - 1.59)	0.000343825	1.33 (1.13 - 1.57)	0.000553095	1.35 (1.07 - 1.70)	0.0115768	1.34 (1.06 - 1.69)	0.0143873	1.35 (1.06 - 1.72)	0.0165502	1.34 (1.05 - 1.71)	0.0194276
rs72657797	1.35 (1.14 - 1.59)	0.000343825	1.34 (1.14 - 1.58)	0.000400089	1.35 (1.07 - 1.70)	0.0115768	1.35 (1.07 - 1.70)	0.0118113	1.35 (1.06 - 1.72)	0.0165502	1.35 (1.06 - 1.72)	0.0166774
rs72773790	1.35 (1.14 - 1.59)	0.000343825	1.35 (1.15 - 1.59)	0.000324078	1.35 (1.07 - 1.70)	0.0115768	1.35 (1.07 - 1.70)	0.0117968	1.35 (1.06 - 1.72)	0.0165502	1.34 (1.05 - 1.72)	0.0177165
rs728017	1.35 (1.14 - 1.59)	0.000343825	1.34 (1.14 - 1.58)	0.000441494	1.35 (1.07 - 1.70)	0.0115768	1.34 (1.06 - 1.69)	0.0138416	1.35 (1.06 - 1.72)	0.0165502	1.34 (1.05 - 1.71)	0.0189326
rs72820274	1.35 (1.14 - 1.59)	0.000343825	1.33 (1.13 - 1.56)	0.000512011	1.35 (1.07 - 1.70)	0.0115768	1.33 (1.05 - 1.67)	0.0158948	1.35 (1.06 - 1.72)	0.0165502	1.33 (1.04 - 1.70)	0.020774
rs72899452	1.35 (1.14 - 1.59)	0.000343825	1.34 (1.14 - 1.58)	0.000428396	1.35 (1.07 - 1.70)	0.0115768	1.34 (1.06 - 1.69)	0.0141773	1.35 (1.06 - 1.72)	0.0165502	1.35 (1.06 - 1.72)	0.0157814
rs73079014	1.35 (1.14 - 1.59)	0.000343825	1.32 (1.13 - 1.55)	0.000548396	1.35 (1.07 - 1.70)	0.0115768	1.33 (1.06 - 1.67)	0.0154829	1.35 (1.06 - 1.72)	0.0165502	1.33 (1.04 - 1.70)	0.0211641
rs73163783	1.35 (1.14 - 1.59)	0.000343825	1.34 (1.14 - 1.58)	0.000420361	1.35 (1.07 - 1.70)	0.0115768	1.35 (1.07 - 1.70)	0.0125326	1.35 (1.06 - 1.72)	0.0165502	1.35 (1.06 - 1.73)	0.0154723
rs73671843	1.35 (1.14 - 1.59)	0.000343825	1.36 (1.15 - 1.60)	0.00025633	1.35 (1.07 - 1.70)	0.0115768	1.36 (1.08 - 1.72)	0.00887188	1.35 (1.06 - 1.72)	0.0165502	1.35 (1.05 - 1.72)	0.0173313
rs7402939	1.35 (1.14 - 1.59)	0.000343825	1.34 (1.13 - 1.57)	0.000494206	1.35 (1.07 - 1.70)	0.0115768	1.34 (1.06 - 1.69)	0.0130159	1.35 (1.06 - 1.72)	0.0165502	1.33 (1.05 - 1.70)	0.020526
rs742760	1.35 (1.14 - 1.59)	0.000343825	1.35 (1.14 - 1.59)	0.000351455	1.35 (1.07 - 1.70)	0.0115768	1.34 (1.06 - 1.70)	0.0128641	1.35 (1.06 - 1.72)	0.0165502	1.35 (1.06 - 1.72)	0.0165112
rs7432782	1.35 (1.14 - 1.59)	0.000343825	1.34 (1.14 - 1.58)	0.000394597	1.35 (1.07 - 1.70)	0.0115768	1.35 (1.07 - 1.71)	0.0111665	1.35 (1.06 - 1.72)	0.0165502	1.35 (1.06 - 1.73)	0.0148775
rs7475916	1.35 (1.14 - 1.59)	0.000343825	1.35 (1.14 - 1.59)	0.000363254	1.35 (1.07 - 1.70)	0.0115768	1.34 (1.06 - 1.70)	0.0128454	1.35 (1.06 - 1.72)	0.0165502	1.35 (1.06 - 1.72)	0.0164239
rs7486418	1.35 (1.14 - 1.59)	0.000343825	1.35 (1.14 - 1.58)	0.000387356	1.35 (1.07 - 1.70)	0.0115768	1.34 (1.06 - 1.69)	0.0141835	1.35 (1.06 - 1.72)	0.0165502	1.35 (1.06 - 1.73)	0.0147829
rs75452188	1.35 (1.14 - 1.59)	0.000343825	1.35 (1.14 - 1.59)	0.000366995	1.35 (1.07 - 1.70)	0.0115768	1.34 (1.06 - 1.69)	0.0137752	1.35 (1.06 - 1.72)	0.0165502	1.35 (1.05 - 1.72)	0.016922
rs7566062	1.35 (1.14 - 1.59)	0.000343825	1.34 (1.14 - 1.58)	0.000411704	1.35 (1.07 - 1.70)	0.0115768	1.35 (1.07 - 1.70)	0.0117517	1.35 (1.06 - 1.72)	0.0165502	1.34 (1.05 - 1.70)	0.0204007
rs7571486	1.35 (1.14 - 1.59)	0.000343825	1.36 (1.15 - 1.60)	0.000253087	1.35 (1.07 - 1.70)	0.0115768	1.35 (1.07 - 1.70)	0.0117384	1.35 (1.06 - 1.72)	0.0165502	1.36 (1.07 - 1.74)	0.0126581
rs75932578	1.35 (1.14 - 1.59)	0.000343825	1.35 (1.15 - 1.59)	0.000298869	1.35 (1.07 - 1.70)	0.0115768	1.35 (1.07 - 1.71)	0.0111405	1.35 (1.06 - 1.72)	0.0165502	1.35 (1.06 - 1.72)	0.0161153
rs7599697	1.35 (1.14 - 1.59)	0.000343825	1.35 (1.15 - 1.59)	0.000328277	1.35 (1.07 - 1.70)	0.0115768	1.35 (1.07 - 1.71)	0.0111841	1.35 (1.06 - 1.72)	0.0165502	1.36 (1.06 - 1.73)	0.0140487
rs76145129	1.35 (1.14 - 1.59)	0.000343825	1.32 (1.13 - 1.55)	0.000586802	1.35 (1.07 - 1.70)	0.0115768	1.32 (1.05 - 1.67)	0.0168194	1.35 (1.06 - 1.72)	0.0165502	1.31 (1.03 - 1.67)	0.0256599
rs7615602	1.35 (1.14 - 1.59)	0.000343825	1.34 (1.14 - 1.58)	0.000455188	1.35 (1.07 - 1.70)	0.0115768	1.34 (1.06 - 1.68)	0.0146832	1.35 (1.06 - 1.72)	0.0165502	1.33 (1.04 - 1.70)	0.0213327
rs7625896	1.35 (1.14 - 1.59)	0.000343825	1.34 (1.14 - 1.58)	0.000399631	1.35 (1.07 - 1.70)	0.0115768	1.35 (1.07 - 1.70)	0.0119218	1.35 (1.06 - 1.72)	0.0165502	1.34 (1.05 - 1.72)	0.0174541
rs78206187	1.35 (1.14 - 1.59)	0.000343825	1.35 (1.15 - 1.59)	0.000332796	1.35 (1.07 - 1.70)	0.0115768	1.35 (1.07 - 1.71)	0.0106767	1.35 (1.06 - 1.72)	0.0165502	1.36 (1.07 - 1.74)	0.0133998
rs79204944	1.35 (1.14 - 1.59)	0.000343825	1.34 (1.14 - 1.57)	0.000470806	1.35 (1.07 - 1.70)	0.0115768	1.34 (1.06 - 1.68)	0.0142378	1.35 (1.06 - 1.72)	0.0165502	1.34 (1.05 - 1.70)	0.0197588
rs79693059	1.35 (1.14 - 1.59)	0.000343825	1.36 (1.15 - 1.60)	0.000264187	1.35 (1.07 - 1.70)	0.0115768	1.35 (1.07 - 1.71)	0.0114171	1.35 (1.06 - 1.72)	0.0165502	1.35 (1.06 - 1.72)	0.0167181
rs7992992	1.35 (1.14 - 1.59)	0.000343825	1.33 (1.13 - 1.57)	0.000491835	1.35 (1.07 - 1.70)	0.0115768	1.33 (1.06 - 1.68)	0.0150771	1.35 (1.06 - 1.72)	0.0165502	1.33 (1.04 - 1.69)	0.0217904
rs8076183	1.35 (1.14 - 1.59)	0.000343825	1.35 (1.14 - 1.59)	0.000367401	1.35 (1.07 - 1.70)	0.0115768	1.33 (1.06 - 1.68)	0.01498	1.35 (1.06 - 1.72)	0.0165502	1.35 (1.06 - 1.73)	0.0147338
rs8180457	1.35 (1.14 - 1.59)	0.000343825	1.35 (1.15 - 1.59)	0.000279018	1.35 (1.07 - 1.70)	0.0115768	1.34 (1.06 - 1.69)	0.0135611	1.35 (1.06 - 1.72)	0.0165502	1.36 (1.07 - 1.74)	0.0124365
rs8181889	1.35 (1.14 - 1.59)	0.000343825	1.36 (1.15 - 1.60)	0.000252205	1.35 (1.07 - 1.70)	0.0115768	1.35 (1.07 - 1.70)	0.0124099	1.35 (1.06 - 1.72)	0.0165502	1.36 (1.07 - 1.74)	0.01223
rs823247	1.35 (1.14 - 1.59)	0.000343825	1.34 (1.14 - 1.58)	0.000461256	1.35 (1.07 - 1.70)	0.0115768	1.34 (1.06 - 1.69)	0.0144431	1.35 (1.06 - 1.72)	0.0165502	1.34 (1.05 - 1.71)	0.0187753
rs830716	1.35 (1.14 - 1.59)	0.000343825	1.36 (1.15 - 1.60)	0.000242265	1.35 (1.07 - 1.70)	0.0115768	1.36 (1.08 - 1.71)	0.00968609	1.35 (1.06 - 1.72)	0.0165502	1.36 (1.07 - 1.74)	0.0121398
rs871994	1.35 (1.14 - 1.59)	0.000343825	1.35 (1.14 - 1.59)	0.000341421	1.35 (1.07 - 1.70)	0.0115768	1.37 (1.08 - 1.72)	0.0081049	1.35 (1.06 - 1.72)	0.0165502	1.35 (1.06 - 1.72)	0.0161556
rs874168	1.35 (1.14 - 1.59)	0.000343825	1.34 (1.14 - 1.57)	0.000471496	1.35 (1.07 - 1.70)	0.0115768	1.35 (1.07 - 1.70)	0.0116386	1.35 (1.06 - 1.72)	0.0165502	1.33 (1.05 - 1.70)	0.0201914
rs908668	1.35 (1.14 - 1.59)	0.000343825	1.36 (1.16 - 1.60)	0.000206547	1.35 (1.07 - 1.70)	0.0115768	1.36 (1.08 - 1.71)	0.0101323	1.35 (1.06 - 1.72)	0.0165502	1.37 (1.08 - 1.75)	0.0109383
rs910187	1.35 (1.14 - 1.59)	0.000343825	1.35 (1.14 - 1.59)	0.00034837	1.35 (1.07 - 1.70)	0.0115768	1.35 (1.07 - 1.70)	0.0118028	1.35 (1.06 - 1.72)	0.0165502	1.34 (1.05 - 1.72)	0.0175206
rs9316619	1.35 (1.14 - 1.59)	0.000343825	1.35 (1.15 - 1.59)	0.000279708	1.35 (1.07 - 1.70)	0.0115768	1.36 (1.08 - 1.72)	0.0093138	1.35 (1.06 - 1.72)	0.0165502	1.35 (1.06 - 1.72)	0.0161037
rs9394502	1.35 (1.14 - 1.59)	0.000343825	1.36 (1.15 - 1.60)	0.00027422	1.35 (1.07 - 1.70)	0.0115768	1.37 (1.09 - 1.73)	0.00797458	1.35 (1.06 - 1.72)	0.0165502	1.35 (1.06 - 1.72)	0.0166199
rs940780	1.35 (1.14 - 1.59)	0.000343825	1.35 (1.15 - 1.59)	0.000320455	1.35 (1.07 - 1.70)	0.0115768	1.34 (1.07 - 1.70)	0.0125984	1.35 (1.06 - 1.72)	0.0165502	1.34 (1.05 - 1.71)	0.0190505
rs9469434	1.35 (1.14 - 1.59)	0.000343825	1.36 (1.15 - 1.60)	0.000240338	1.35 (1.07 - 1.70)	0.0115768	1.35 (1.07 - 1.71)	0.0108204	1.35 (1.06 - 1.72)	0.0165502	1.35 (1.06 - 1.73)	0.0147364
rs9527083	1.35 (1.14 - 1.59)	0.000343825	1.36 (1.15 - 1.60)	0.000260091	1.35 (1.07 - 1.70)	0.0115768	1.35 (1.07 - 1.71)	0.0122568	1.35 (1.06 - 1.72)	0.0165502	1.38 (1.08 - 1.77)	0.00924409
rs9563886	1.35 (1.14 - 1.59)	0.000343825	1.34 (1.14 - 1.58)	0.000418857	1.35 (1.07 - 1.70)	0.0115768	1.34 (1.06 - 1.68)	0.014331	1.35 (1.06 - 1.72)	0.0165502	1.34 (1.05 - 1.71)	0.0185481
rs9889282	1.35 (1.14 - 1.59)	0.000343825	1.34 (1.14 - 1.58)	0.000442999	1.35 (1.07 - 1.70)	0.0115768	1.33 (1.06 - 1.68)	0.0153071	1.35 (1.06 - 1.72)	0.0165502	1.34 (1.05 - 1.71)	0.0182357
rs9931543	1.35 (1.14 - 1.59)	0.000343825	1.34 (1.14 - 1.58)	0.000410467	1.35 (1.07 - 1.70)	0.0115768	1.35 (1.07 - 1.70)	0.0120641	1.35 (1.06 - 1.72)	0.0165502	1.33 (1.04 - 1.70)	0.0215517
rs9964420	1.35 (1.14 - 1.59)	0.000343825	1.34 (1.14 - 1.58)	0.000399311	1.35 (1.07 - 1.70)	0.0115768	1.34 (1.07 - 1.70)	0.0125608	1.35 (1.06 - 1.72)	0.0165502	1.34 (1.05 - 1.71)	0.0180649
